# Supplementary material for: Catalyst-Free Trans-Selective Oxyiodination and Oxychlorination of Alkynes Employing N–X (Halogen) Reagents
Source: MDPI journal article supplement (doi:10.3390/molecules28217420), 2023-11-03
Supplement: s1 [file s1]

# **Catalyst-free Trans-selective Oxyiodination and Oxychlorination of Alkynes Employing N–X (Halogen) Reagents**

Jiaqiong Sun<sup>1,†,\*</sup>, Yunliang Guo<sup>1,†</sup>, Jiuli Xia<sup>2</sup>, Guangfan Zheng<sup>2,\*</sup> and Qian Zhang<sup>2,3</sup>

## **Table of Contents**

|                                           |           |
|-------------------------------------------|-----------|
| <b>I. List for the Starting Materials</b> | <b>S2</b> |
| <b>II. Optimization Conditions</b>        | <b>S3</b> |
| <b>III. X-ray Crystallographic Data</b>   | <b>S4</b> |
| <b>IV. NMR Spectra of New Compounds</b>   | <b>S6</b> |

## I. List for the Starting Materials

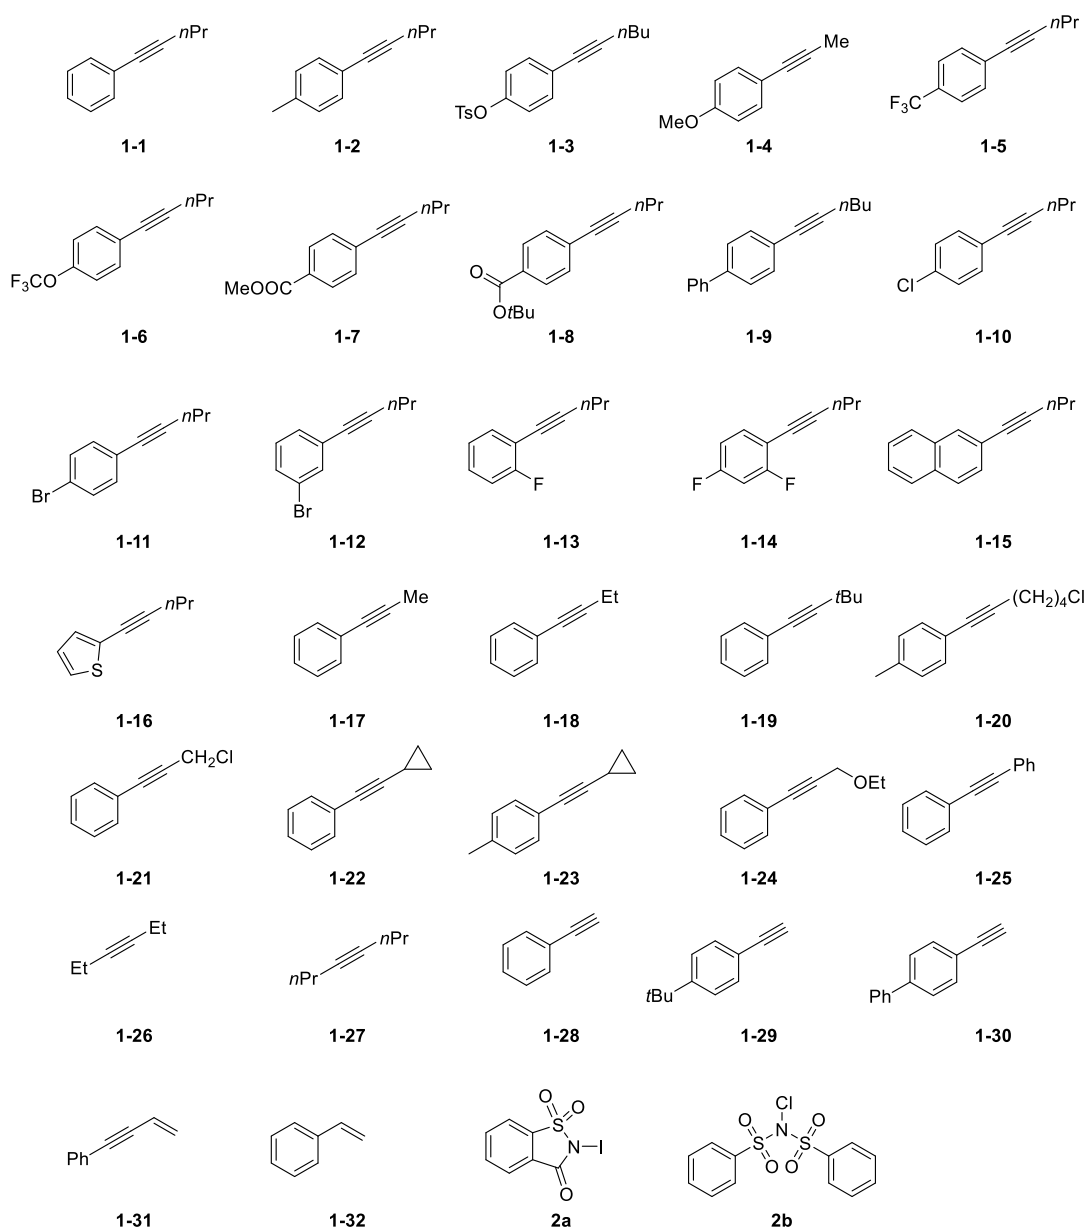

**Scheme S1** List for the Starting Materials.

## II. Optimization Conditions

**Table S1.** Optimization of intermolecular oxyiodination of alkynes.

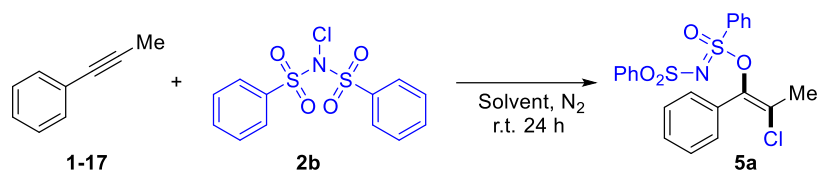

| Entry           | Solvent            | T (°C) | Yield (%) <sup>a</sup> |
|-----------------|--------------------|--------|------------------------|
| 1               | DCM                | 25     | 66                     |
| 2               | DCE                | 25     | 70                     |
| 3               | CHCl <sub>3</sub>  | 25     | 86                     |
| 4               | THF                | 25     | 16                     |
| 5               | Dioxane            | 25     | 22                     |
| 6               | Toluene            | 25     | 35                     |
| 7               | CH <sub>3</sub> CN | 25     | 29                     |
| 8               | CHCl <sub>3</sub>  | 50     | 70                     |
| 9               | CHCl <sub>3</sub>  | 70     | 33                     |
| 10 <sup>b</sup> | CHCl <sub>3</sub>  | 25     | 77                     |
| 11 <sup>c</sup> | CHCl <sub>3</sub>  | 25     | 85                     |

Reaction conditions: **1-17** (0.2 mmol), **2b** (2.0 equiv), Solvents (2 mL), 25 °C, under N<sub>2</sub> atmosphere (g) for 24 h. <sup>a</sup>Yield of the isolated product based on **1-17**. <sup>b</sup> **2b** (1.5 equiv) was employed. <sup>c</sup> Employing Schlenk technical instead of glove box.

### III. X-ray Crystallographic Data

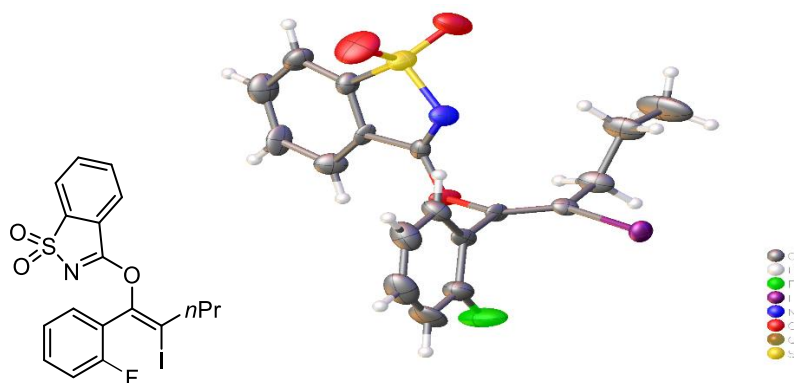

#### Crystal data and structure refinement for 3i

|                                             |                                                               |
|---------------------------------------------|---------------------------------------------------------------|
| Identification code                         | CCDC_2304082                                                  |
| Empirical formula                           | C <sub>18</sub> H <sub>16</sub> FINO <sub>3</sub> S           |
| Formula weight                              | 472.28                                                        |
| Temperature/K                               | 293.01                                                        |
| Crystal system                              | triclinic                                                     |
| Space group                                 | P-1                                                           |
| a/Å                                         | 9.532(3)                                                      |
| b/Å                                         | 9.899(4)                                                      |
| c/Å                                         | 10.483(4)                                                     |
| α/°                                         | 111.72(3)                                                     |
| β/°                                         | 90.99(2)                                                      |
| γ/°                                         | 95.57(3)                                                      |
| Volume/Å <sup>3</sup>                       | 913.1(6)                                                      |
| Z                                           | 2                                                             |
| ρ <sub>calc</sub> /g/cm <sup>3</sup>        | 1.718                                                         |
| μ/mm <sup>-1</sup>                          | 15.088                                                        |
| F(000)                                      | 466.0                                                         |
| Crystal size/mm <sup>3</sup>                | 0.21 × 0.21 × 0.15                                            |
| Radiation                                   | CuKα (λ = 1.54178)                                            |
| 2θ range for data collection/°              | 9.096 to 127.34                                               |
| Index ranges                                | -8 ≤ h ≤ 11, -11 ≤ k ≤ 11, -12 ≤ l ≤ 12                       |
| Reflections collected                       | 5908                                                          |
| Independent reflections                     | 2868 [R <sub>int</sub> = 0.0636, R <sub>sigma</sub> = 0.0773] |
| Data/restraints/parameters                  | 2868/72/227                                                   |
| Goodness-of-fit on F <sup>2</sup>           | 1.131                                                         |
| Final R indexes [I > 2σ (I)]                | R <sub>1</sub> = 0.0996, wR <sub>2</sub> = 0.2432             |
| Final R indexes [all data]                  | R <sub>1</sub> = 0.1033, wR <sub>2</sub> = 0.2494             |
| Largest diff. peak/hole / e Å <sup>-3</sup> | 2.35/-4.73                                                    |

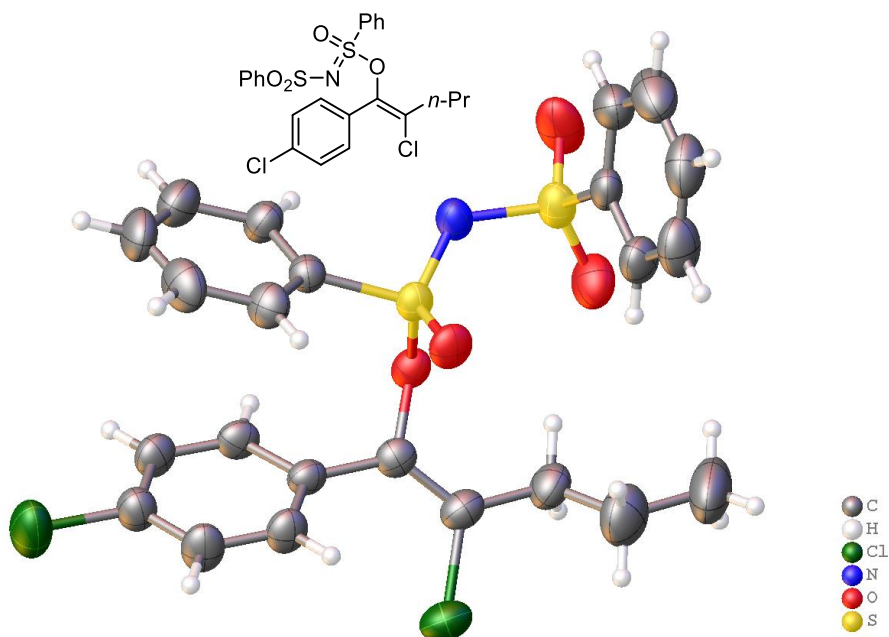

Crystal data and structure refinement for 5j

|                                                                                                          |                                                                                                          |
|----------------------------------------------------------------------------------------------------------|----------------------------------------------------------------------------------------------------------|
| CCDC number                                                                                              | 1829383                                                                                                  |
| Empirical formula                                                                                        | C <sub>27</sub> H <sub>20</sub> Br N O <sub>3</sub> S                                                    |
| Formula weight                                                                                           | 518.41                                                                                                   |
| Temperature                                                                                              | 293(2) K                                                                                                 |
| Wavelength                                                                                               | 0.71073 Å                                                                                                |
| Crystal system, space group                                                                              | Monoclinic, P2 <sub>1</sub> /C                                                                           |
| Unit cell dimensions                                                                                     | a = 12.857 Å    alpha = 90 deg.<br>b = 15.123 Å    beta = 102.04 deg.<br>c = 12.073 Å    gamma = 90 deg. |
| Volume                                                                                                   | 2295.8 Å <sup>3</sup>                                                                                    |
| Z, Calculated density                                                                                    | 4, 1.500 Mg/m <sup>3</sup>                                                                               |
| Reflections collected / unique                                                                           | 12707 / 4058 [R(int) = 0.0561]                                                                           |
| F(000)                                                                                                   | 1056                                                                                                     |
| Absorption correction                                                                                    | Semi-empirical from equivalents                                                                          |
| Max. and min. transmission                                                                               | 0.7625 and 0.5626                                                                                        |
| Refinement method                                                                                        | Full-matrix least-squares on F <sup>2</sup>                                                              |
| Data / restraints / parameters                                                                           | 4058 / 0 / 298                                                                                           |
| Goodness-of-fit on F <sup>2</sup>                                                                        | 1.007                                                                                                    |
| Final R indices [I > 2sigma(I)]                                                                          | R <sub>1</sub> = 0.0490, wR <sub>2</sub> = 0.1117                                                        |
| R indices (all data)                                                                                     | R <sub>1</sub> = 0.0805, wR <sub>2</sub> = 0.1268                                                        |
| Largest diff. peak and hole                                                                              | 0.540 and -0.288 e.Å <sup>-3</sup>                                                                       |
| $R_1 = \sum   F_o  -  F_c   / \sum  F_o $ ; $wR_2 = \sum [w(F_o^2 - F_c^2)^2] / \sum [w(F_o^2)^2]^{1/2}$ |                                                                                                          |

#### IV. NMR Spectra of New Compounds

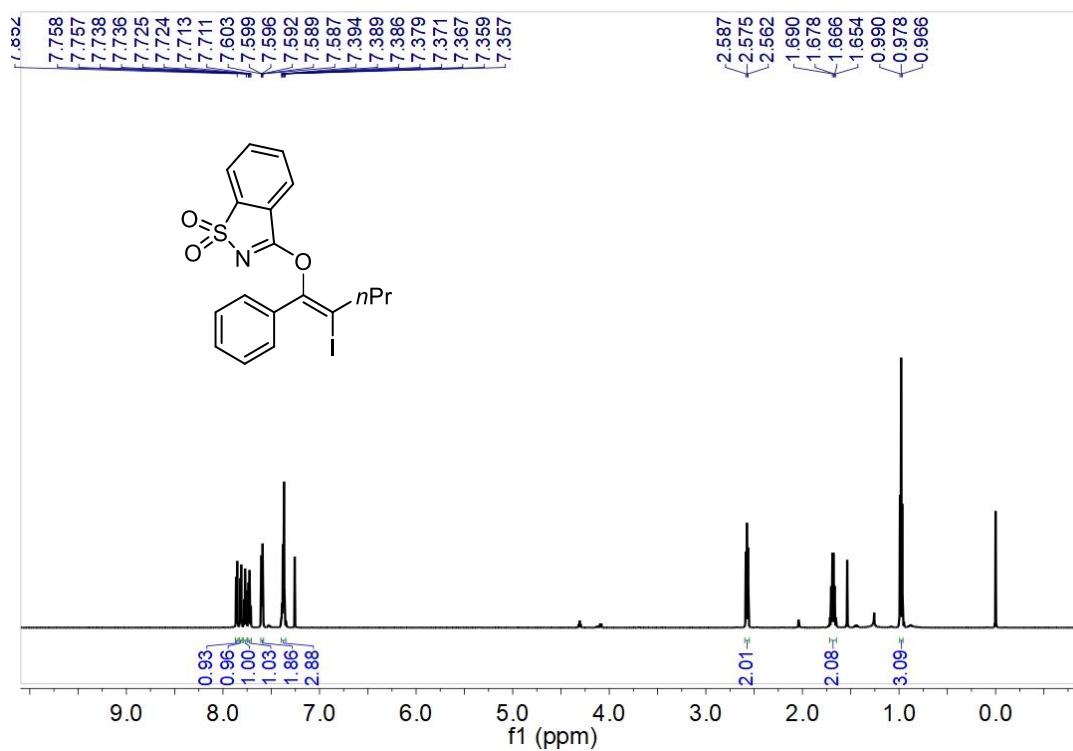

<sup>1</sup>H NMR (600 MHz, CDCl<sub>3</sub>) spectrum of 3a.

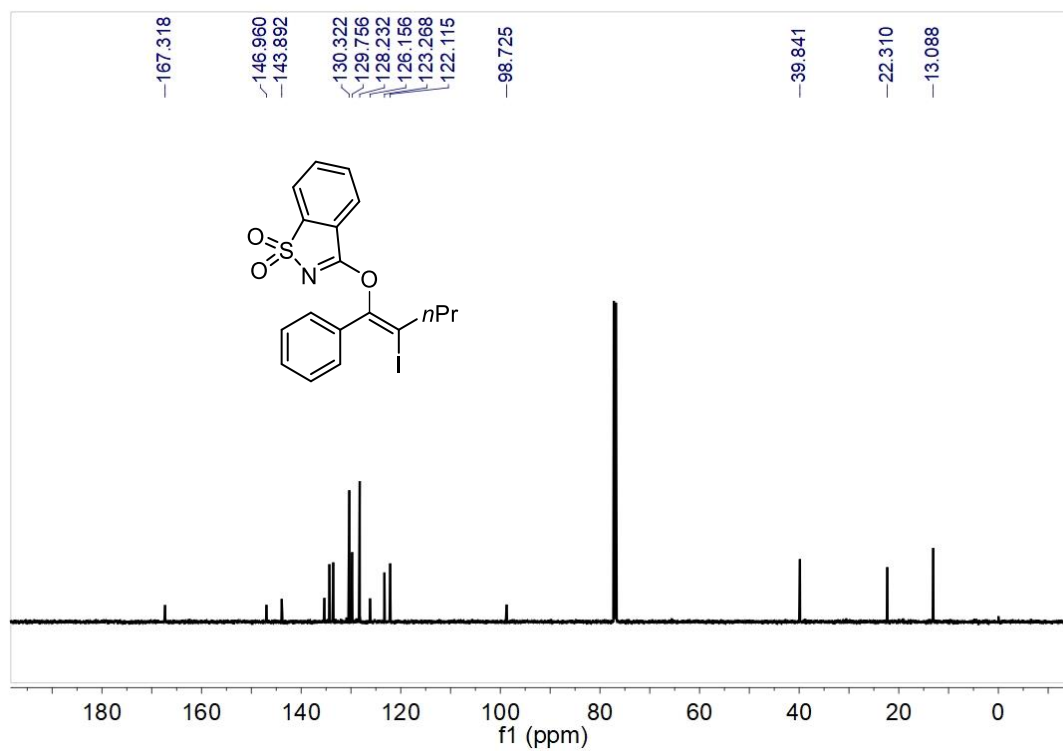

<sup>13</sup>C NMR (150 MHz, CDCl<sub>3</sub>) spectrum of 3a.

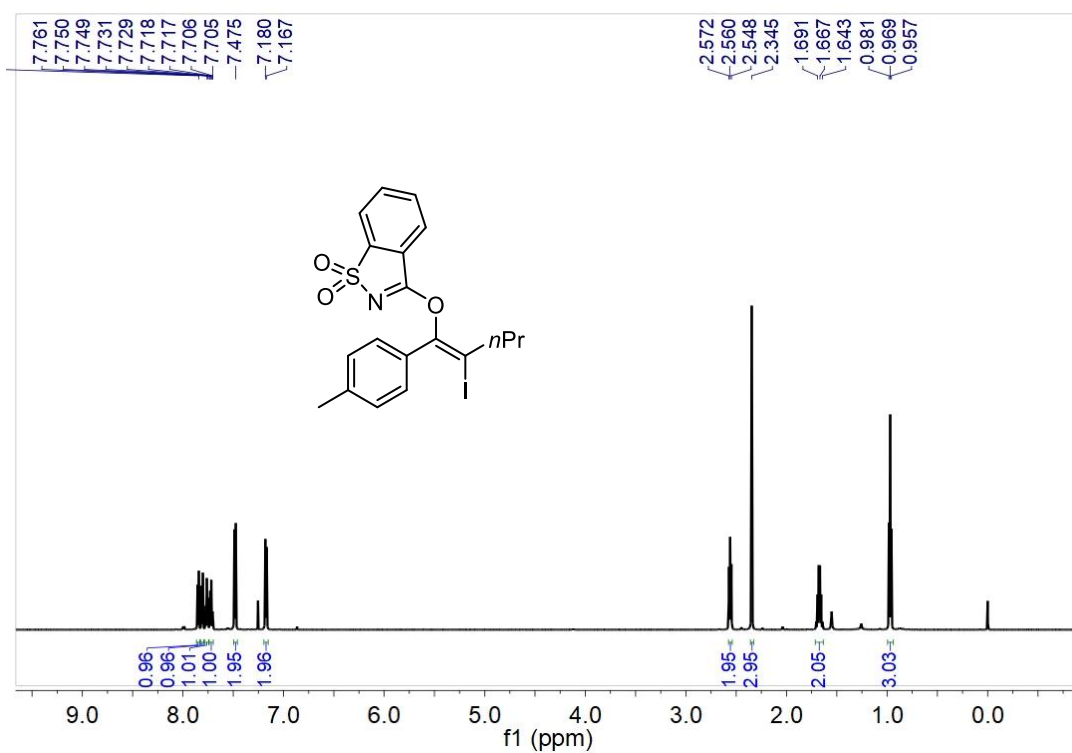

**<sup>1</sup>H NMR (600 MHz, CDCl<sub>3</sub>) spectrum of 3b.**

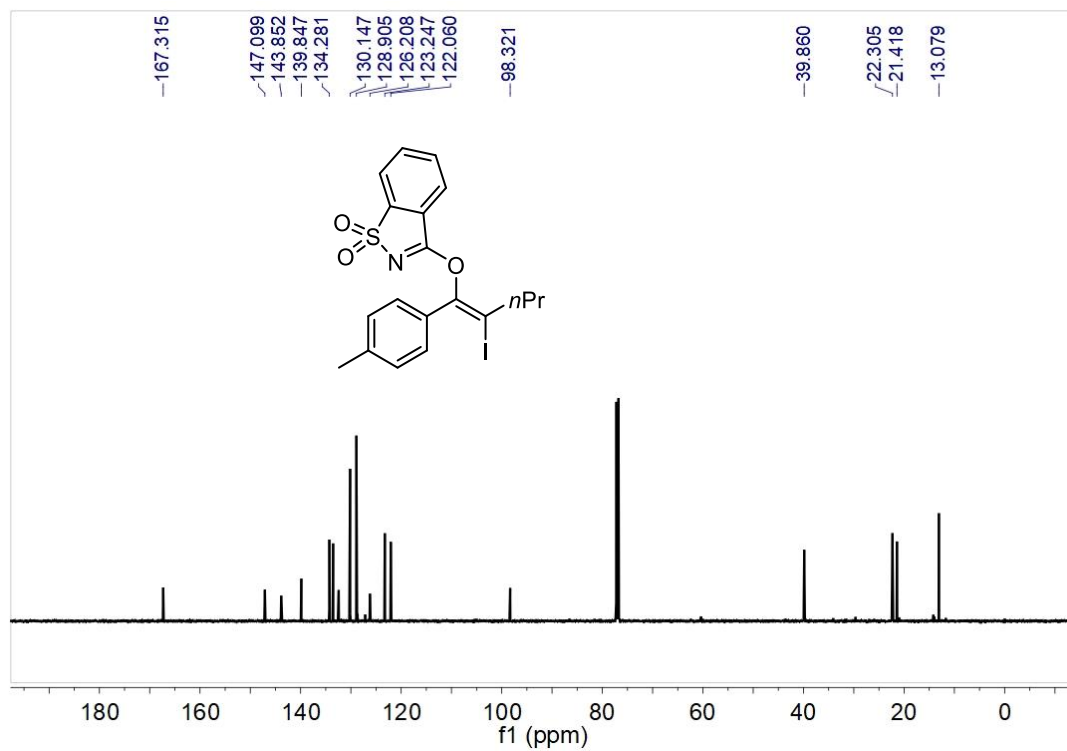

**<sup>13</sup>C NMR (150 MHz, CDCl<sub>3</sub>) spectrum of 3b.**

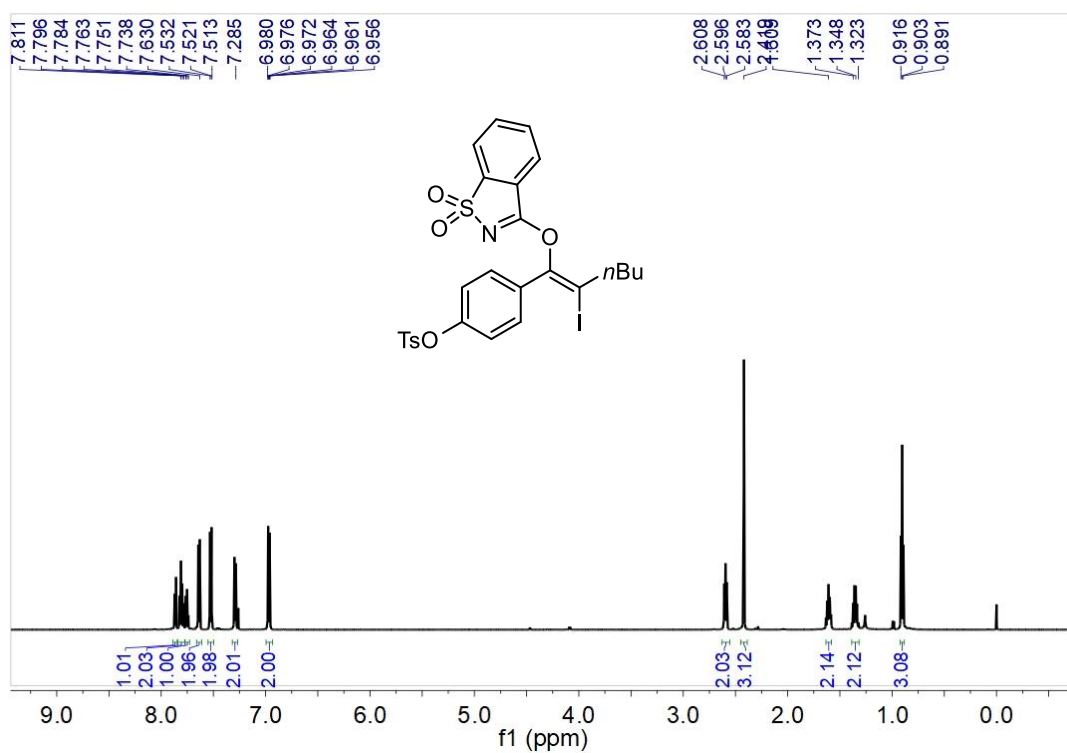

**<sup>1</sup>H NMR (600 MHz, CDCl<sub>3</sub>) spectrum of 3c.**

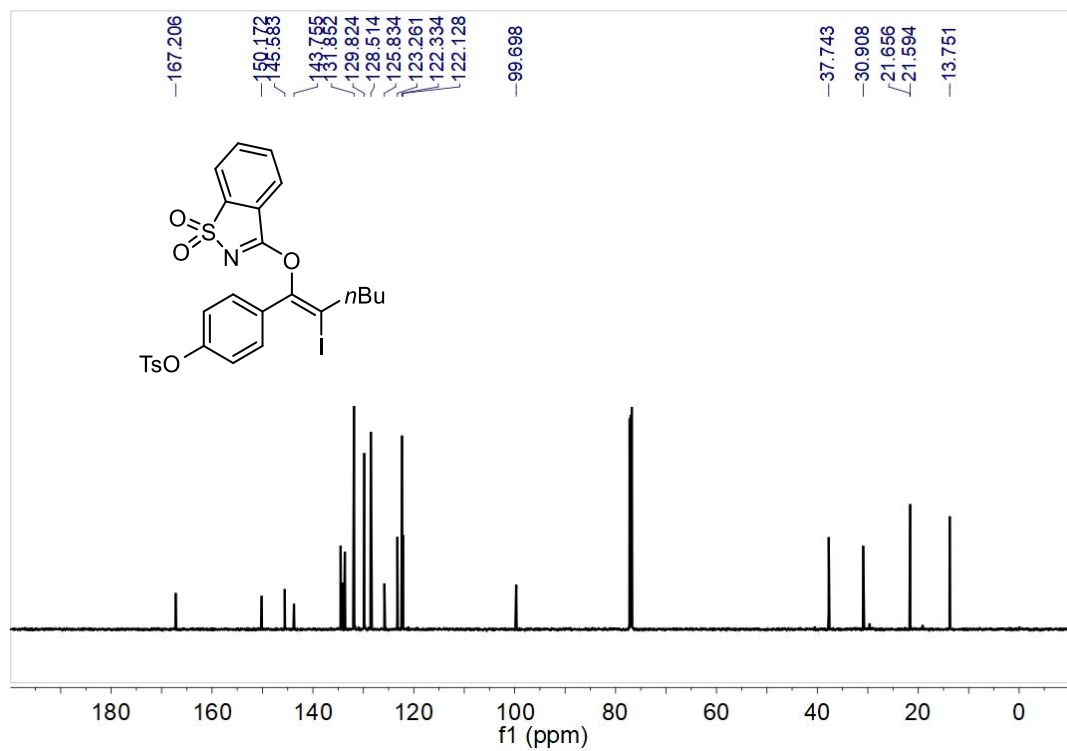

**<sup>13</sup>C NMR (150 MHz, CDCl<sub>3</sub>) spectrum of 3c.**



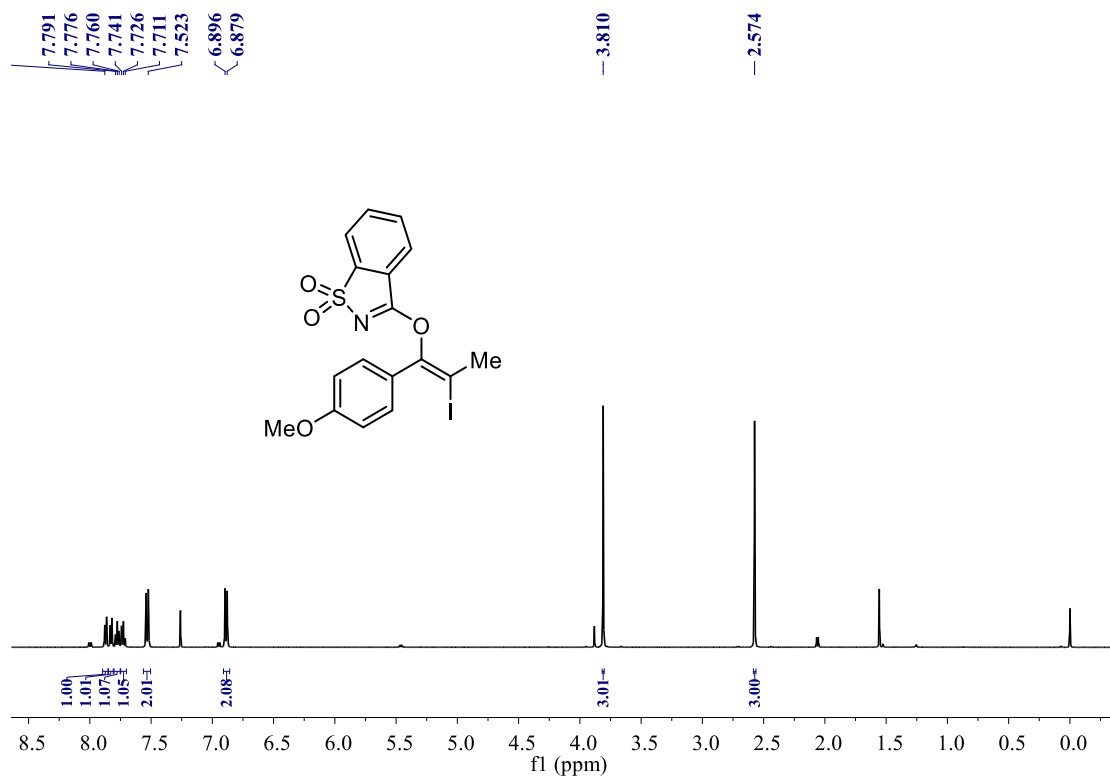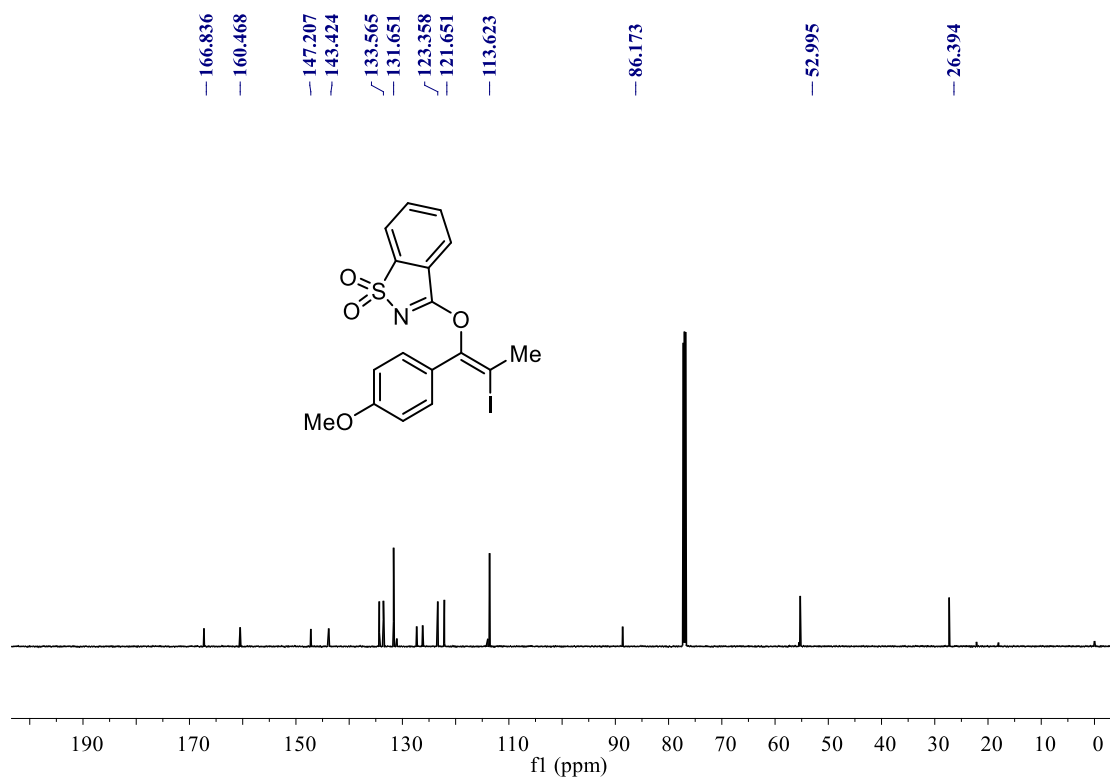

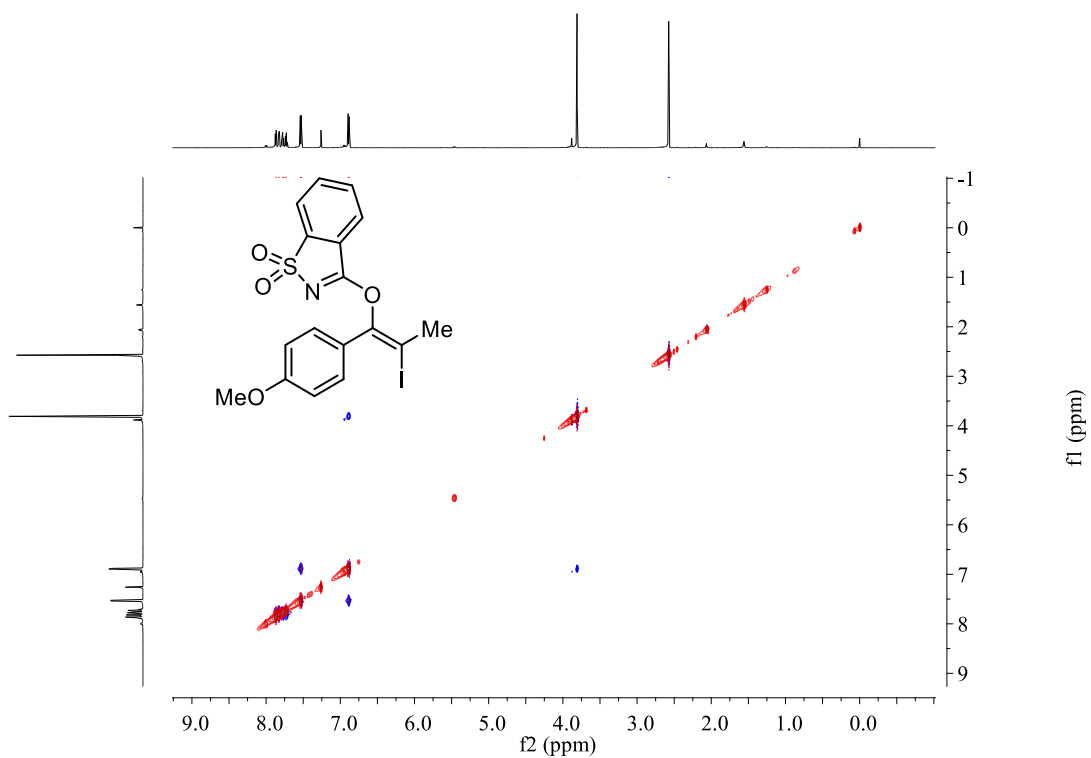

**$^1\text{H}$ - $^1\text{H}$  NOE spectrum of **3d**.**

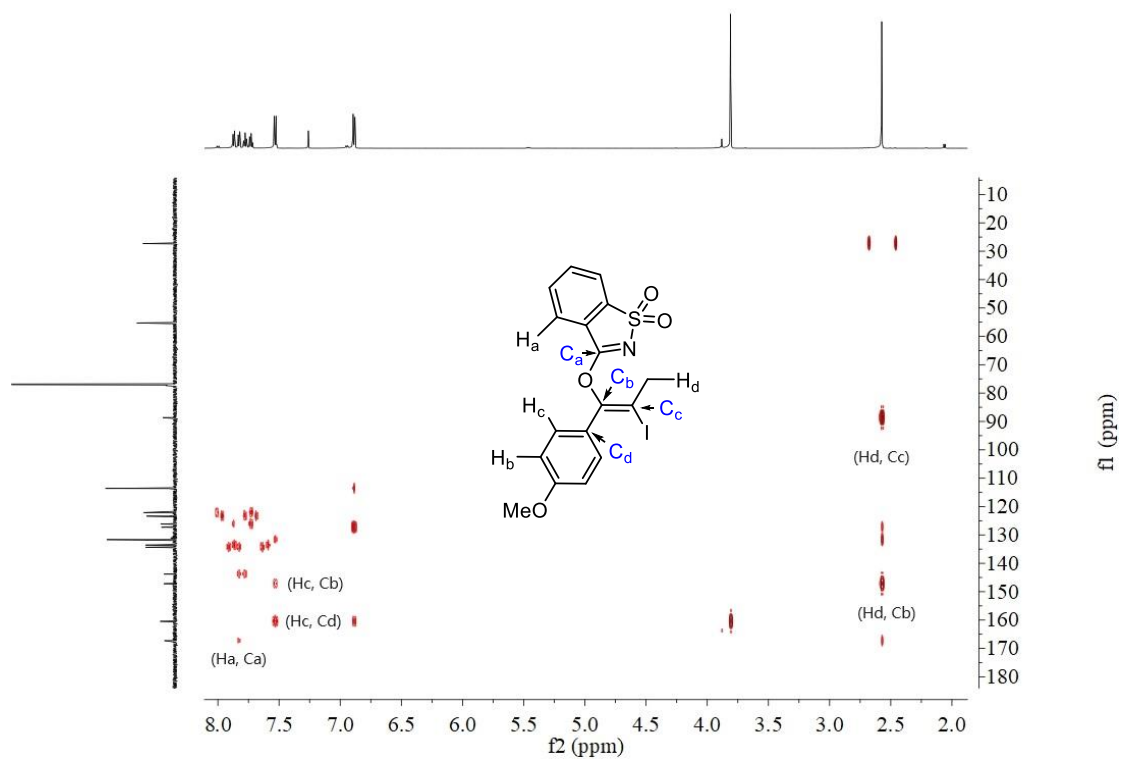

**$^1\text{H}$ - $^{13}\text{C}$  HMQC spectrum of **3d**.**

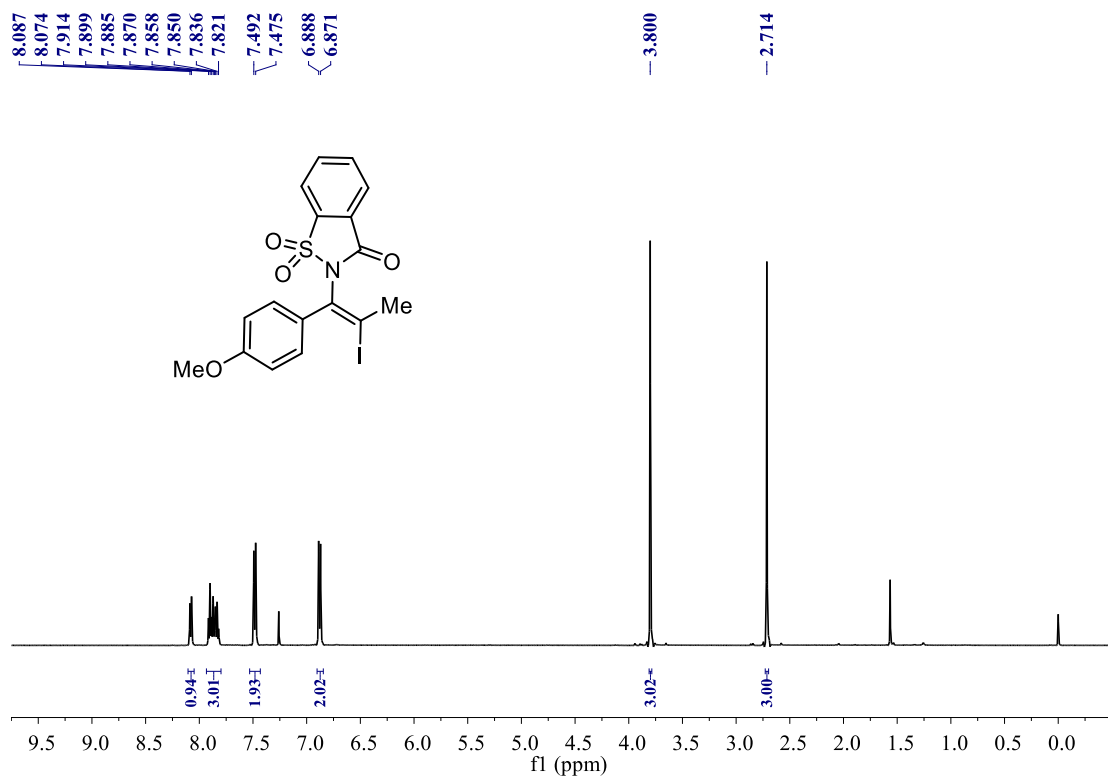

**<sup>1</sup>H NMR (500 MHz, CDCl<sub>3</sub>) spectrum of **3d'**.**

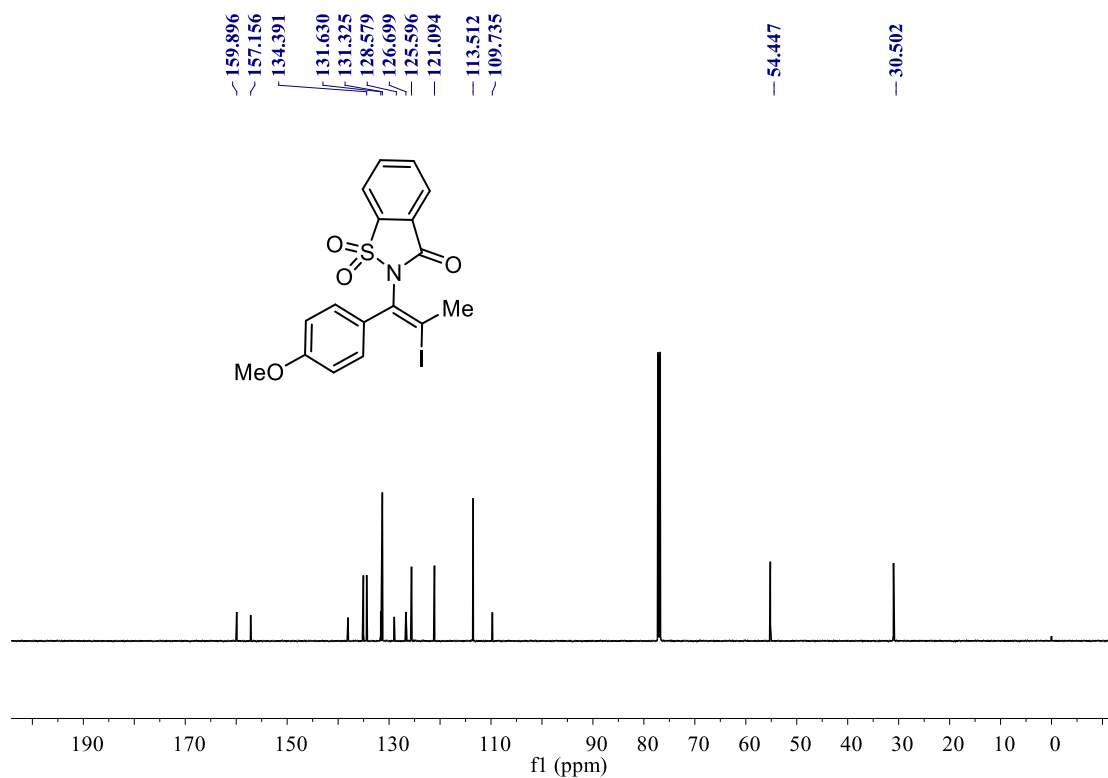

**<sup>13</sup>C NMR (150 MHz, CDCl<sub>3</sub>) spectrum of **3d'**.**

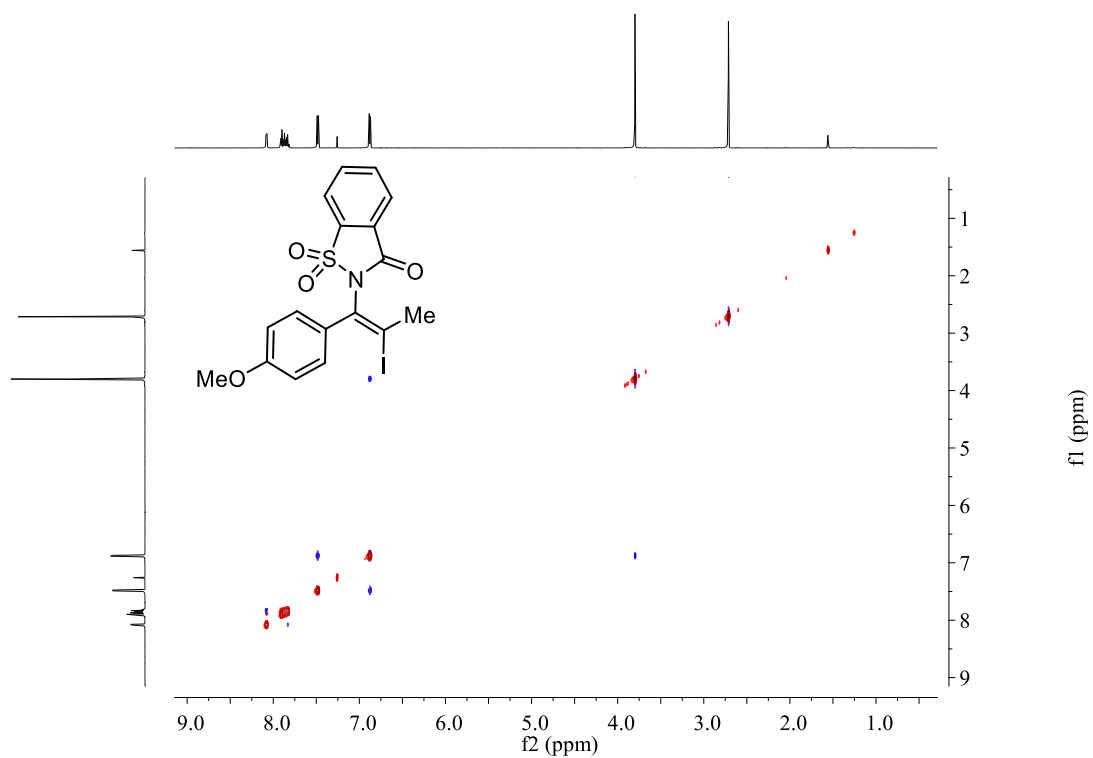

**$^1\text{H}$ - $^1\text{H}$  NOESY spectrum of **3d'**.**

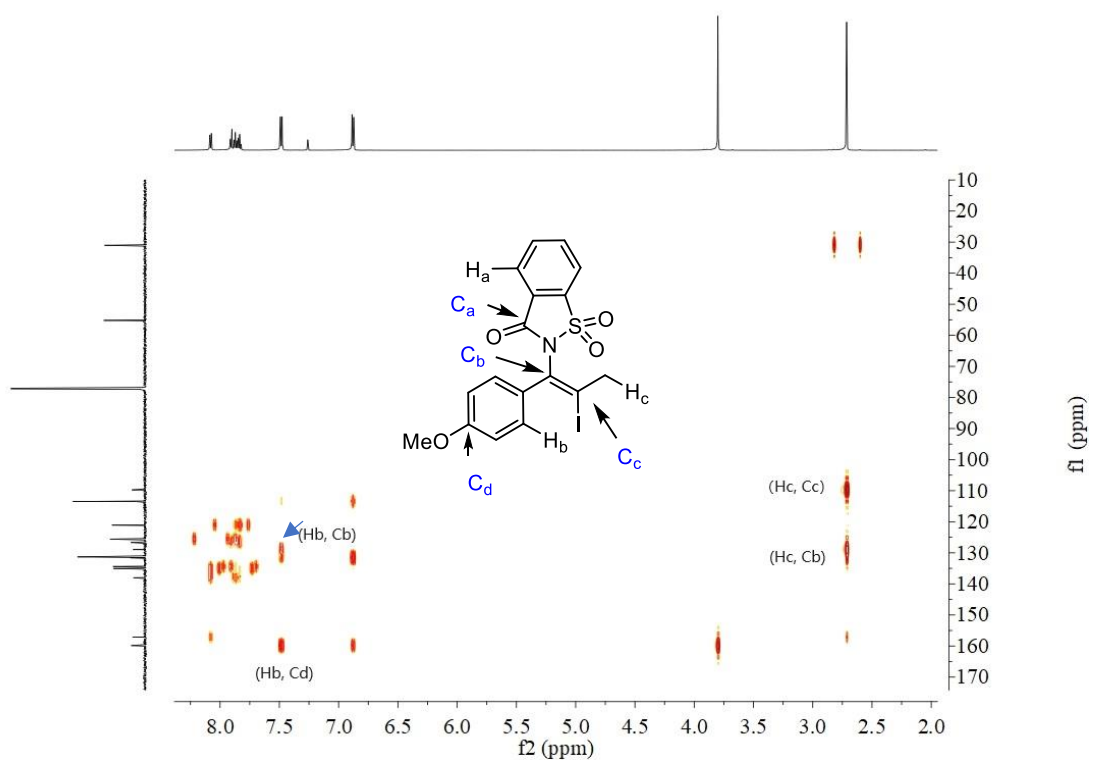

**$^1\text{H}$ - $^{13}\text{C}$  HMQC spectrum of **3d'**.**

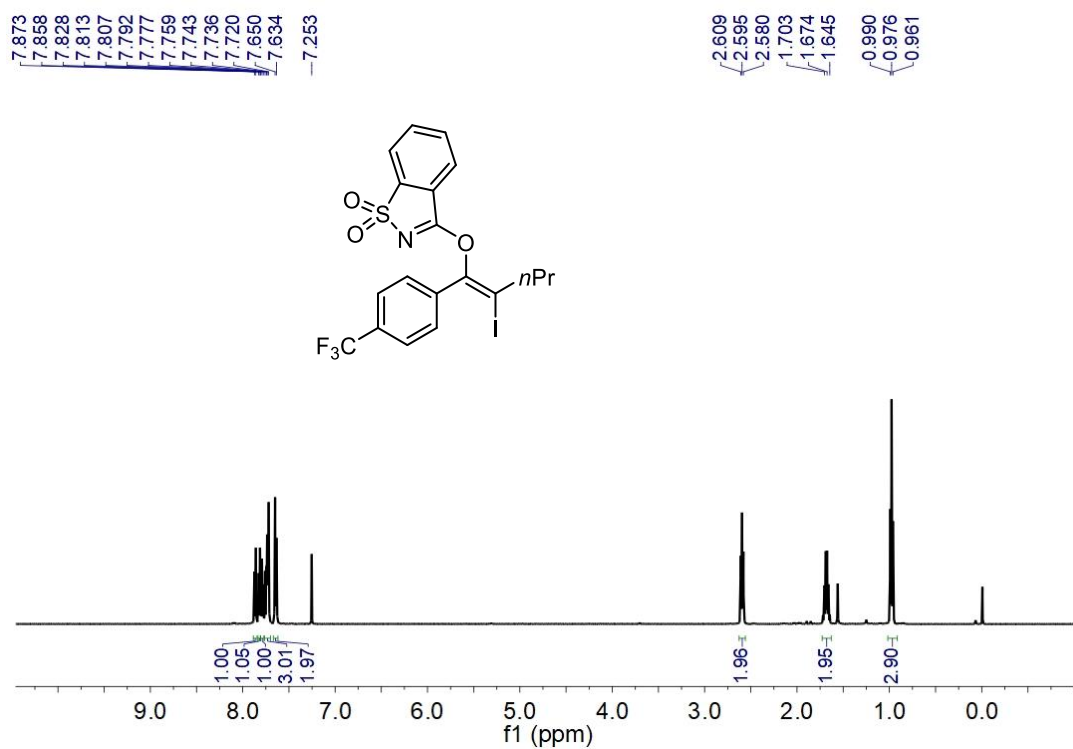

**<sup>1</sup>H NMR (500 MHz, CDCl<sub>3</sub>) spectrum of 3e.**

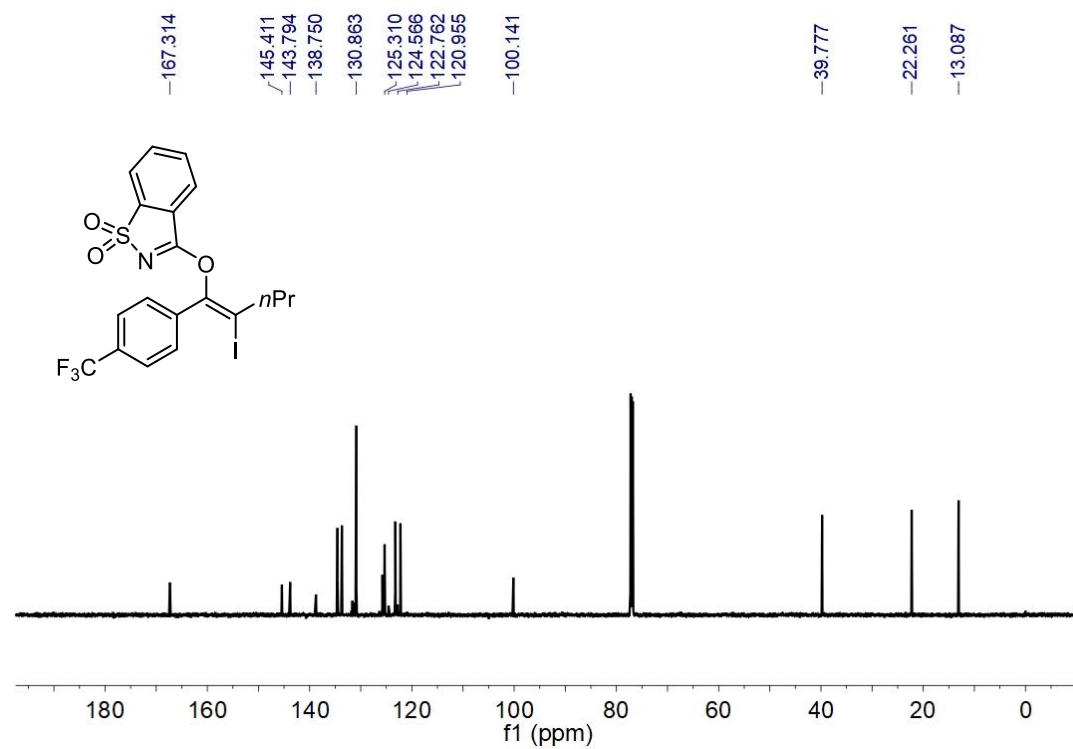

**<sup>13</sup>C NMR (150 MHz, CDCl<sub>3</sub>) spectrum of 3e.**

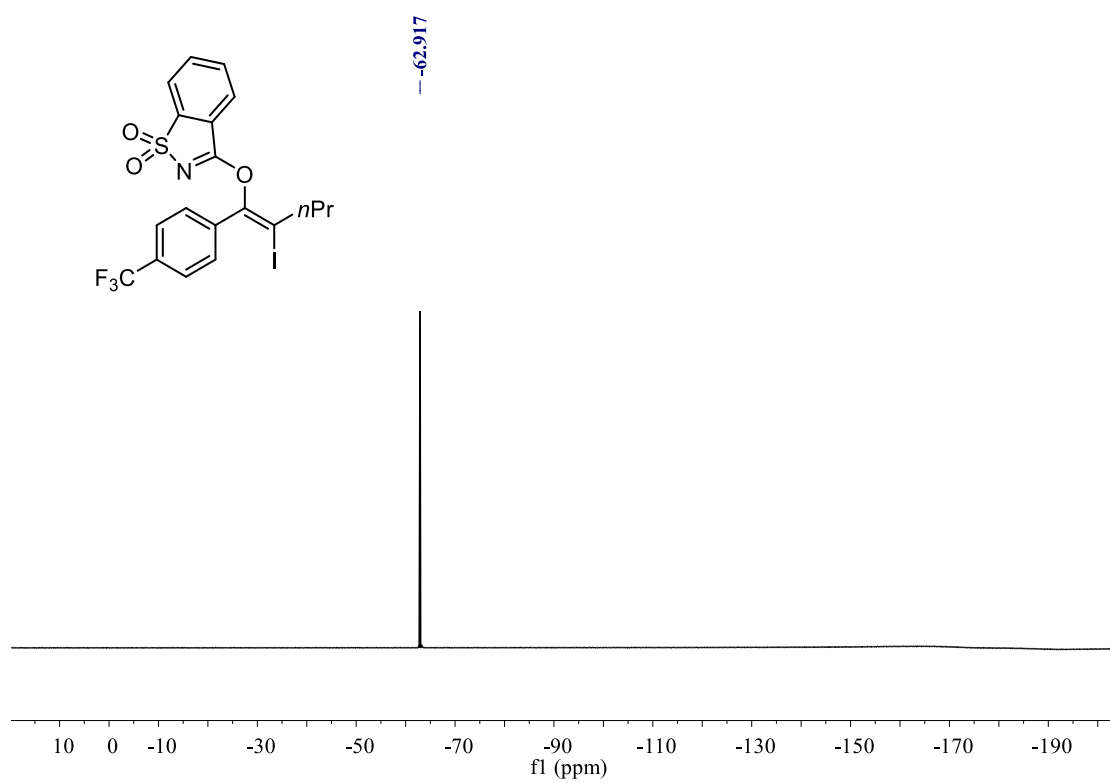

**$^{19}\text{F}$  NMR (565 MHz,  $\text{CDCl}_3$ ) spectrum of 3e.**

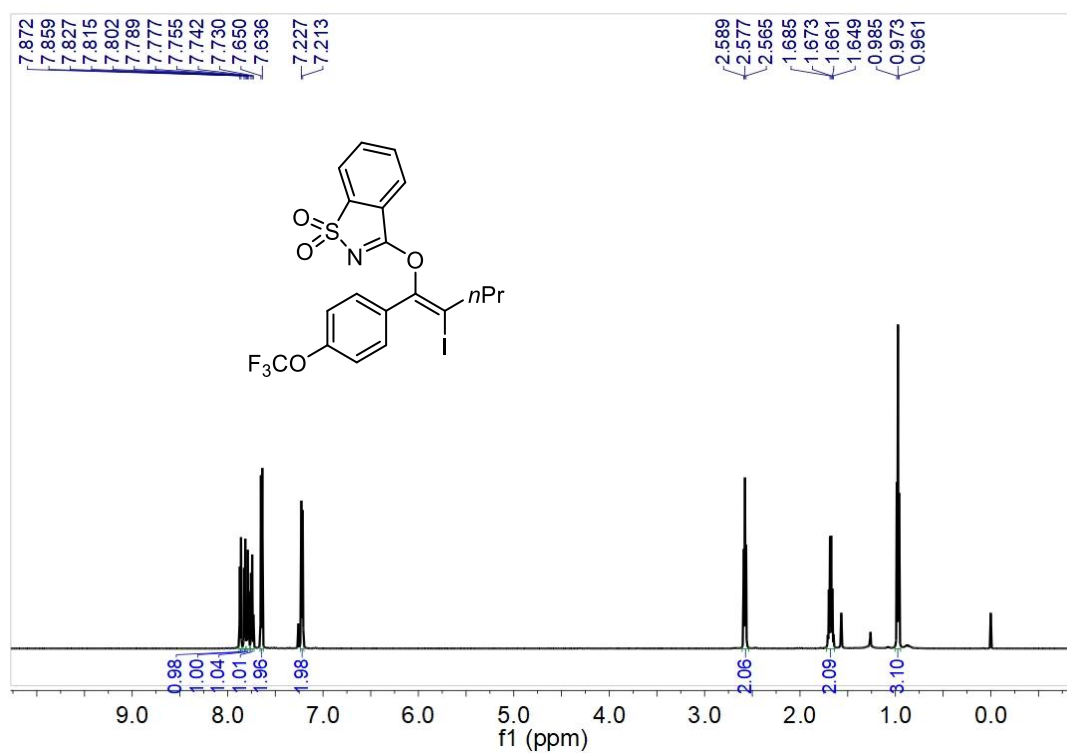

**<sup>1</sup>H NMR (600 MHz, CDCl<sub>3</sub>) spectrum of 3f.**

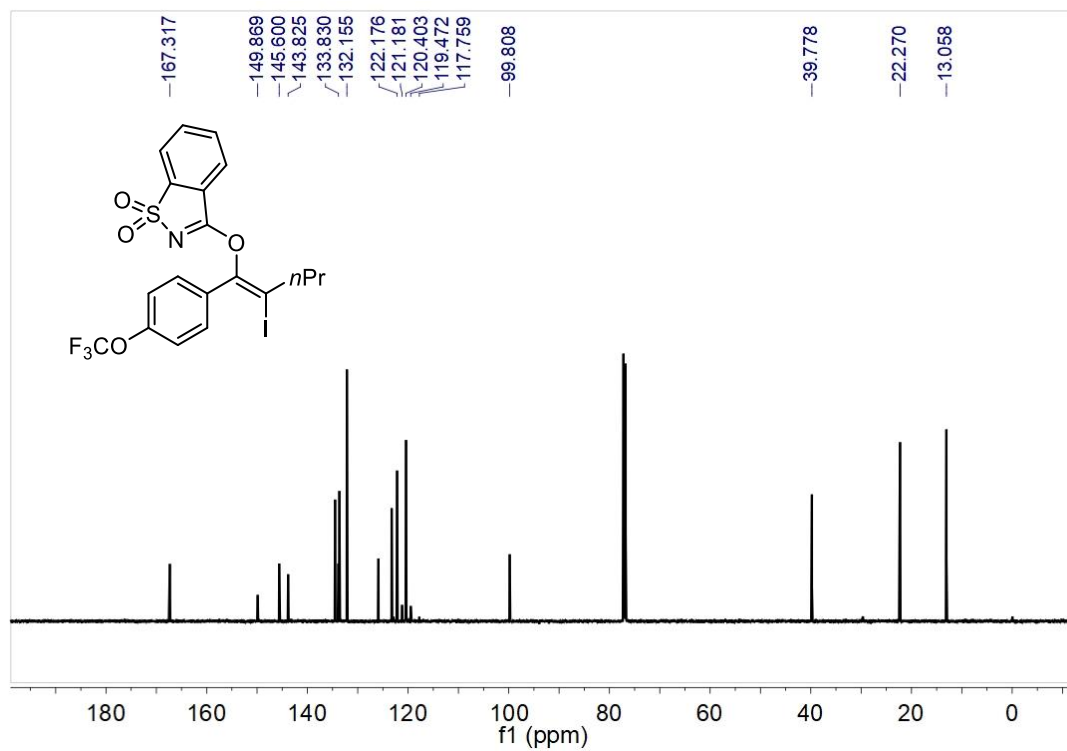

**<sup>13</sup>C NMR (150 MHz, CDCl<sub>3</sub>) spectrum of 3f.**

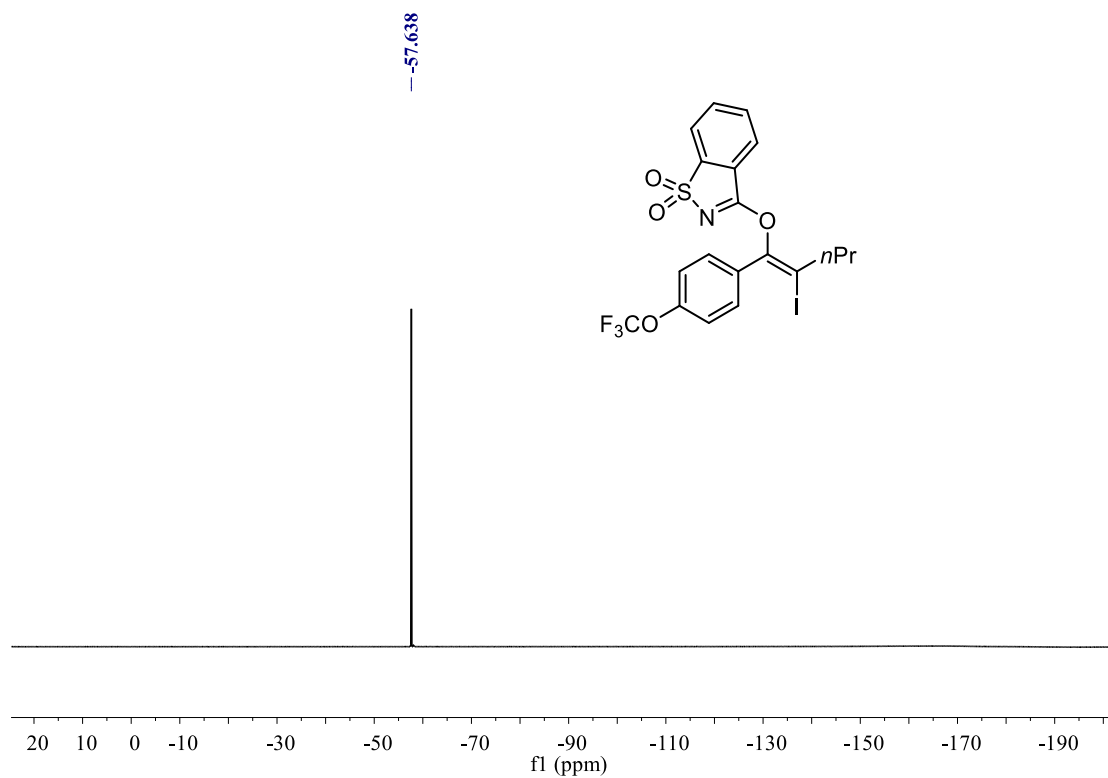

**$^{19}\text{F}$  NMR (565 MHz,  $\text{CDCl}_3$ ) spectrum of 3f.**

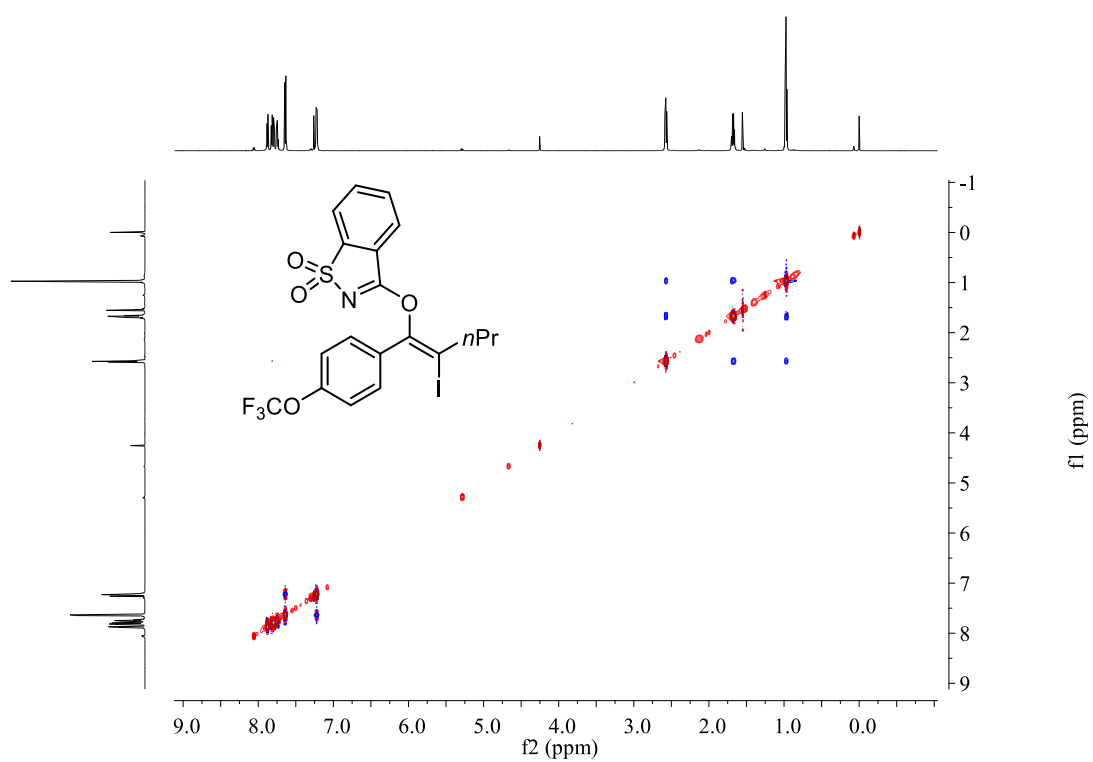

**$^1\text{H}$ - $^1\text{H}$  NOESY spectrum of 3f.**



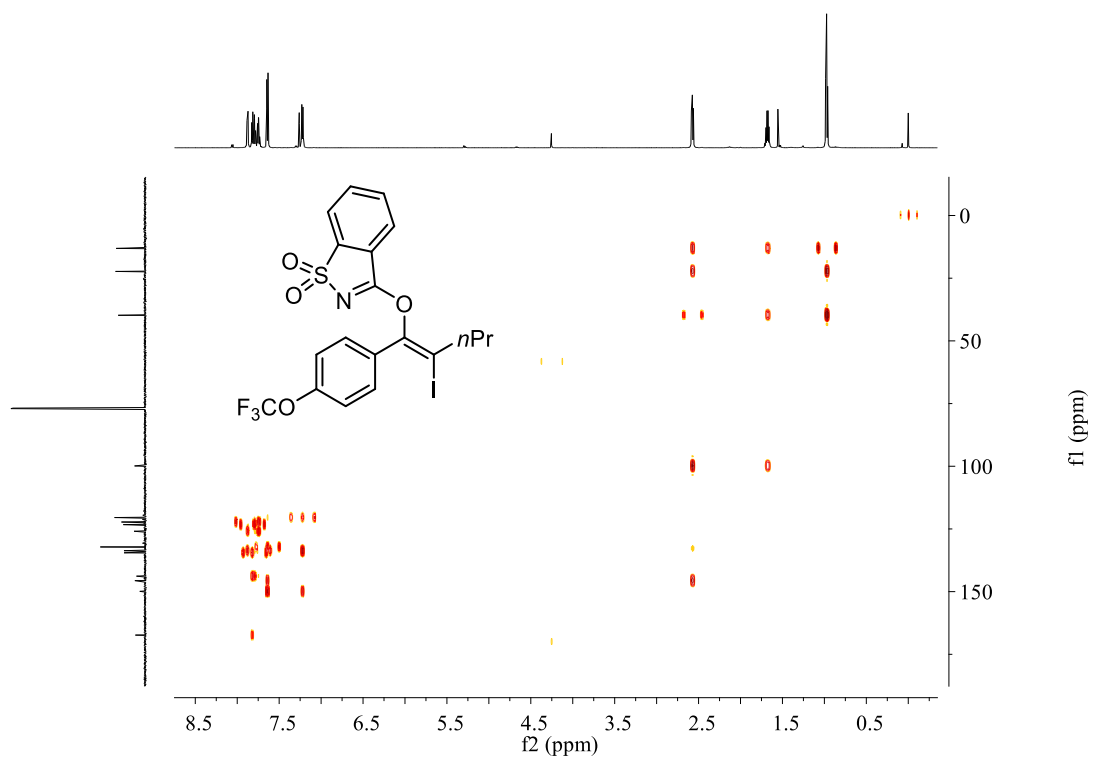

**$^1\text{H}$ - $^{13}\text{C}$  HMQC spectrum of **3f**.**

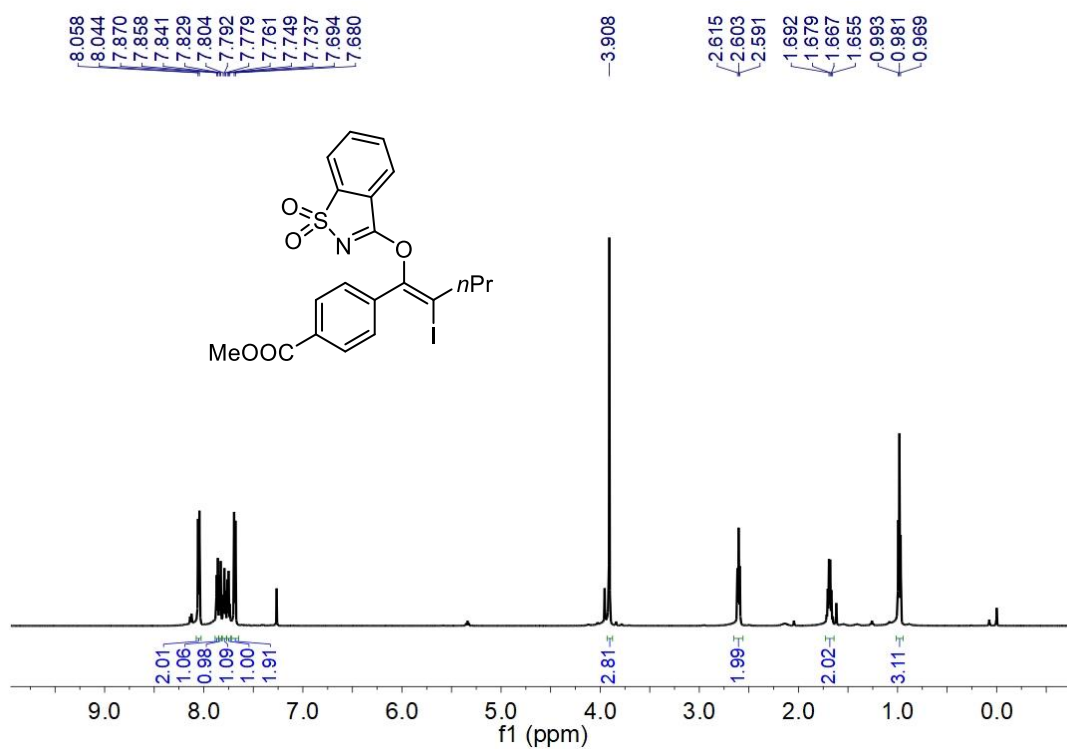

<sup>1</sup>H NMR (600 MHz, CDCl<sub>3</sub>) spectrum of 3g.

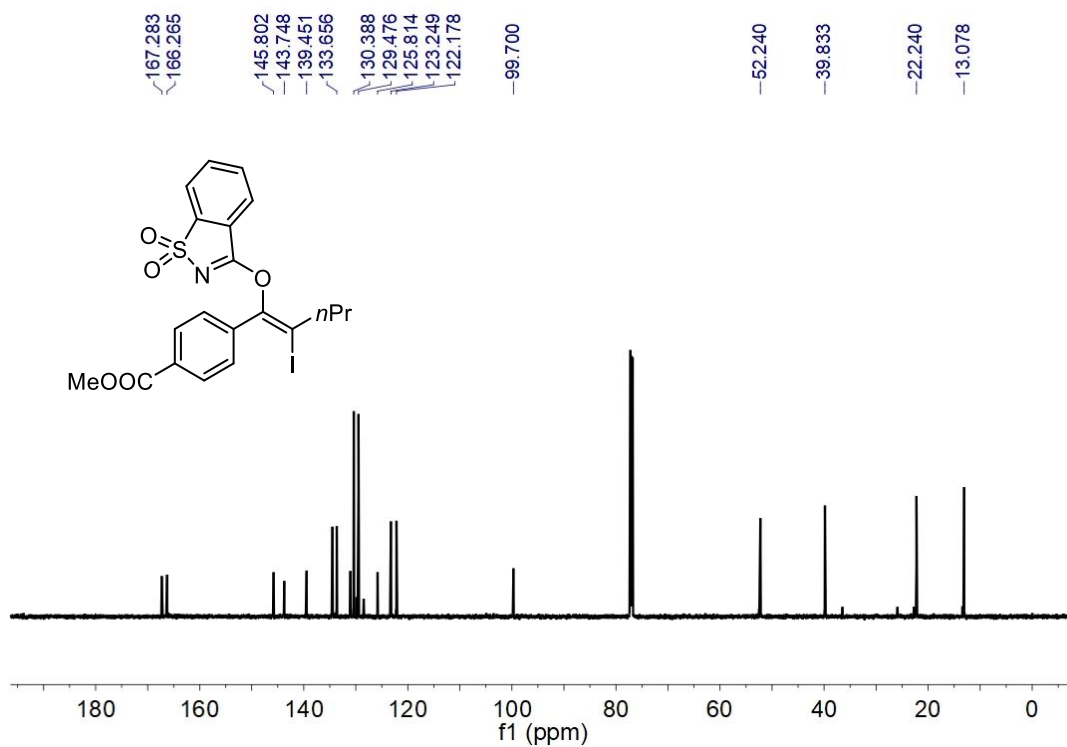

<sup>13</sup>C NMR (150 MHz, CDCl<sub>3</sub>) spectrum of 3g.

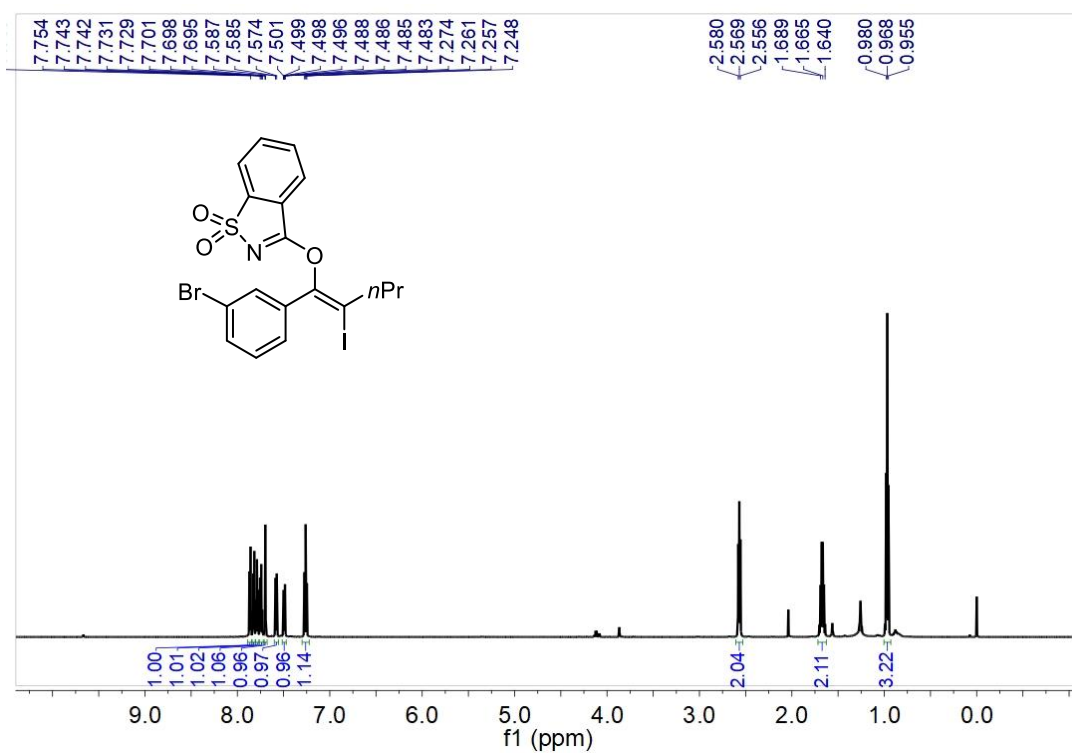

**<sup>1</sup>H NMR (600 MHz, CDCl<sub>3</sub>) spectrum of 3h.**

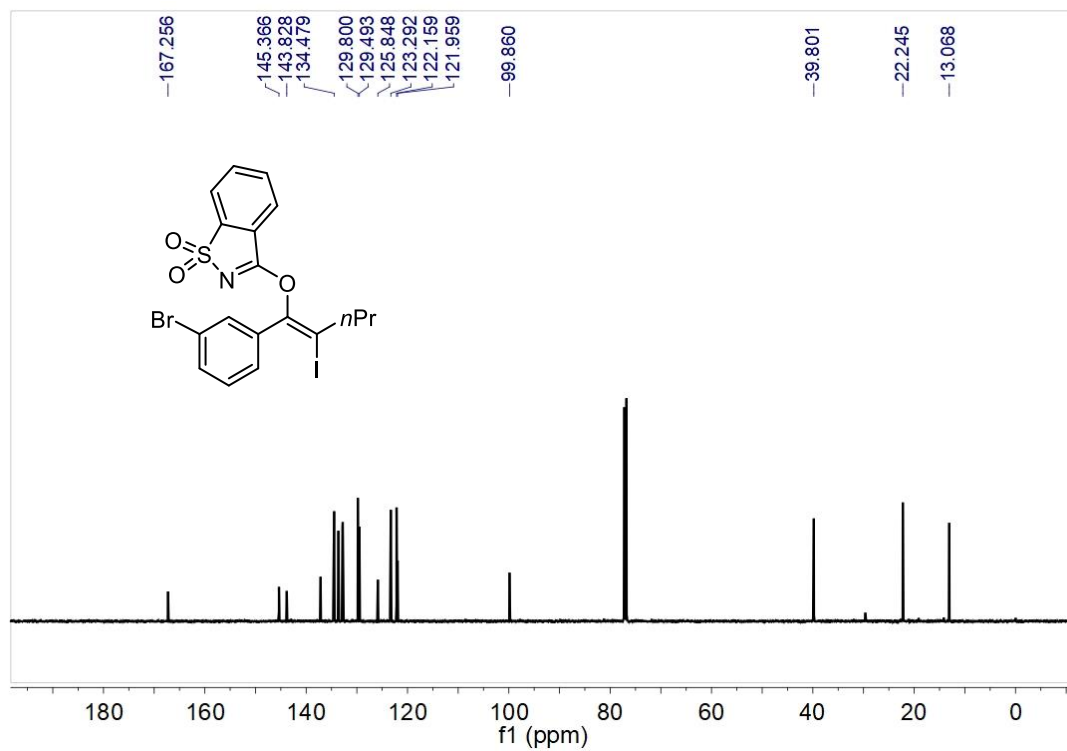

**<sup>13</sup>C NMR (150 MHz, CDCl<sub>3</sub>) spectrum of 3h.**

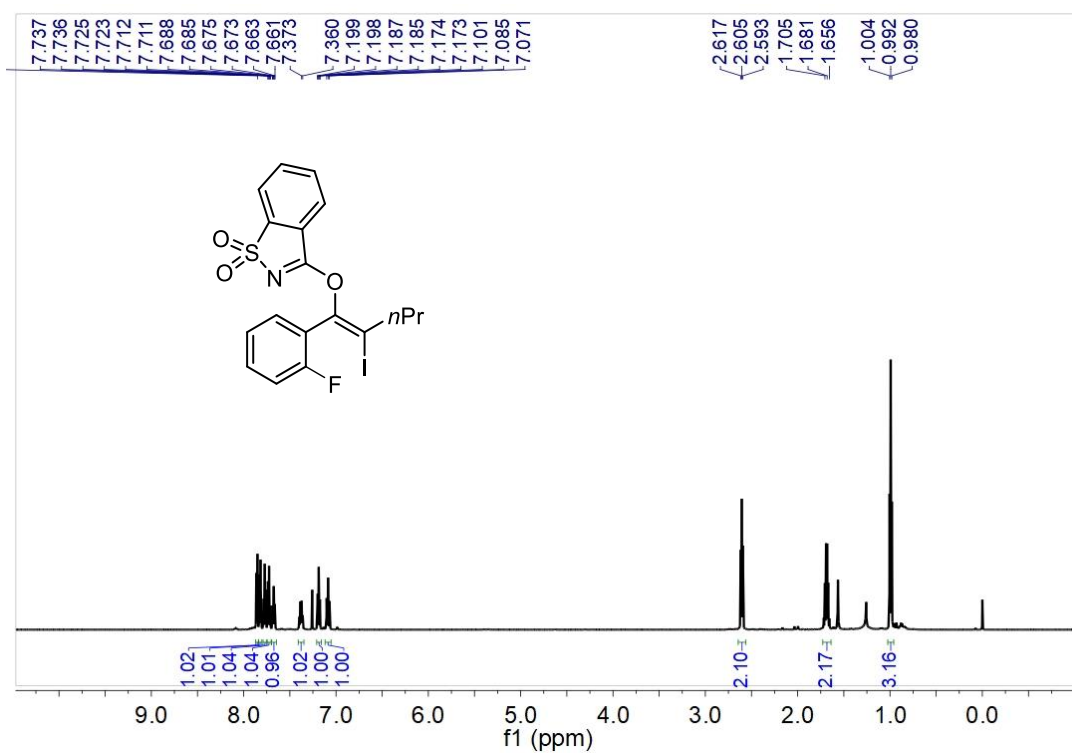

<sup>1</sup>H NMR (600 MHz, CDCl<sub>3</sub>) spectrum of 3i.

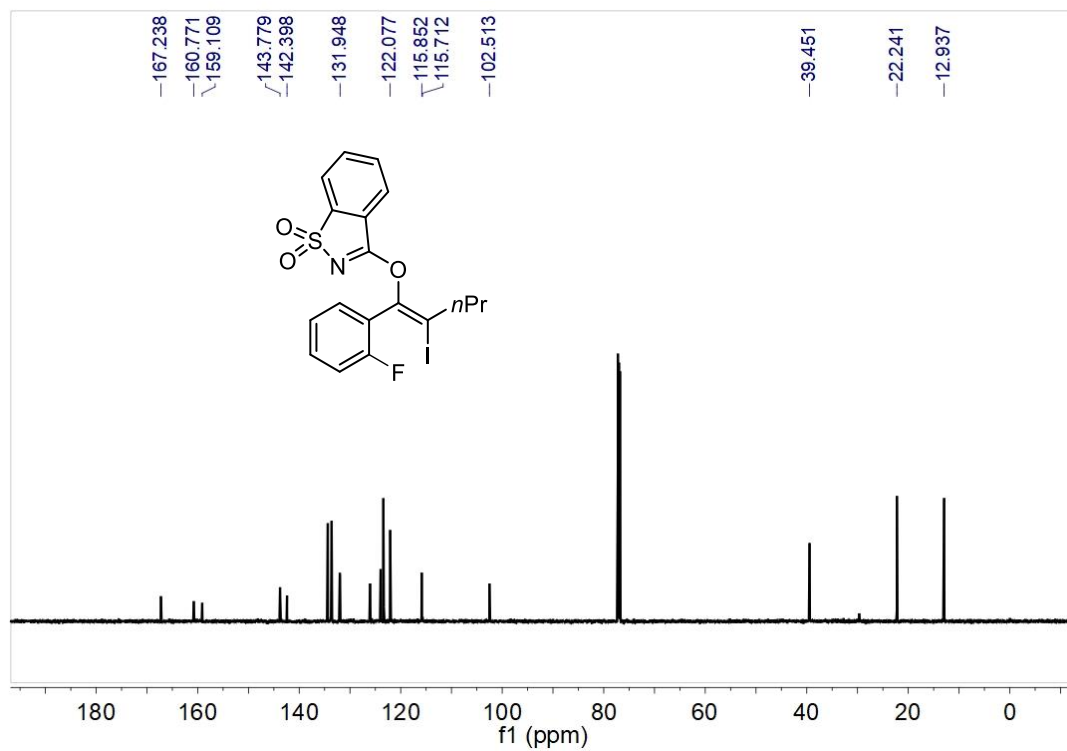

<sup>13</sup>C NMR (150 MHz, CDCl<sub>3</sub>) spectrum of 3i.

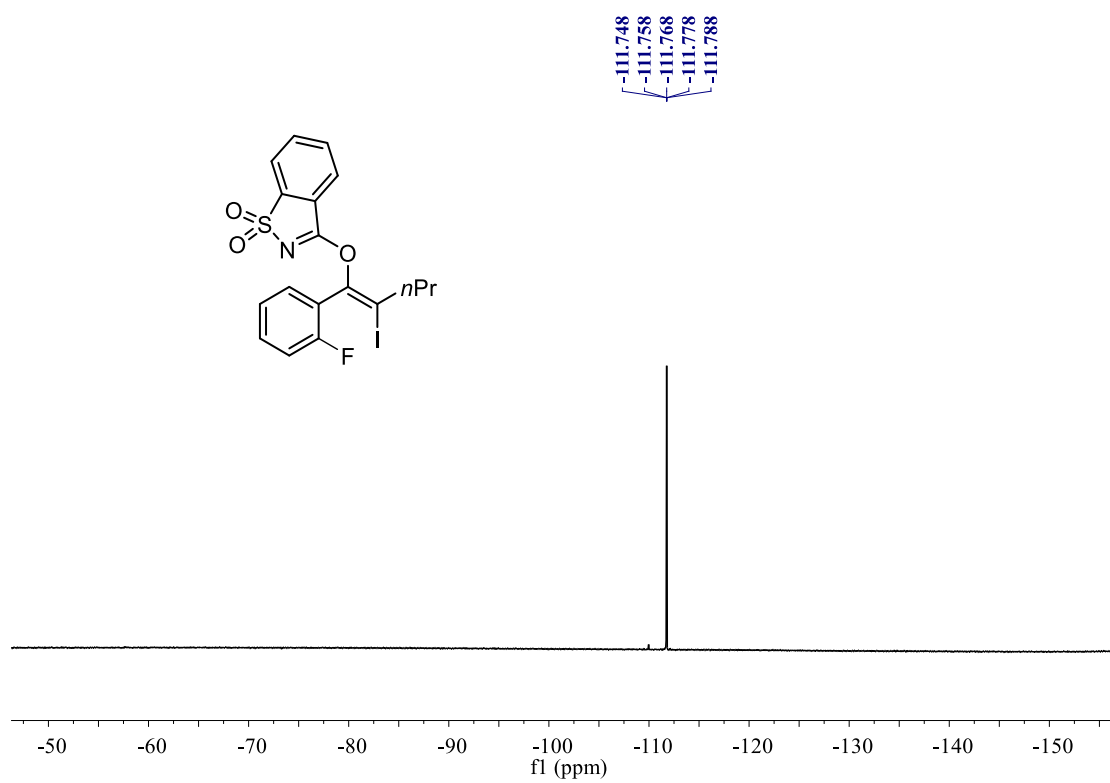

**$^{19}\text{F}$  NMR (565 MHz,  $\text{CDCl}_3$ ) spectrum of **3i**.**

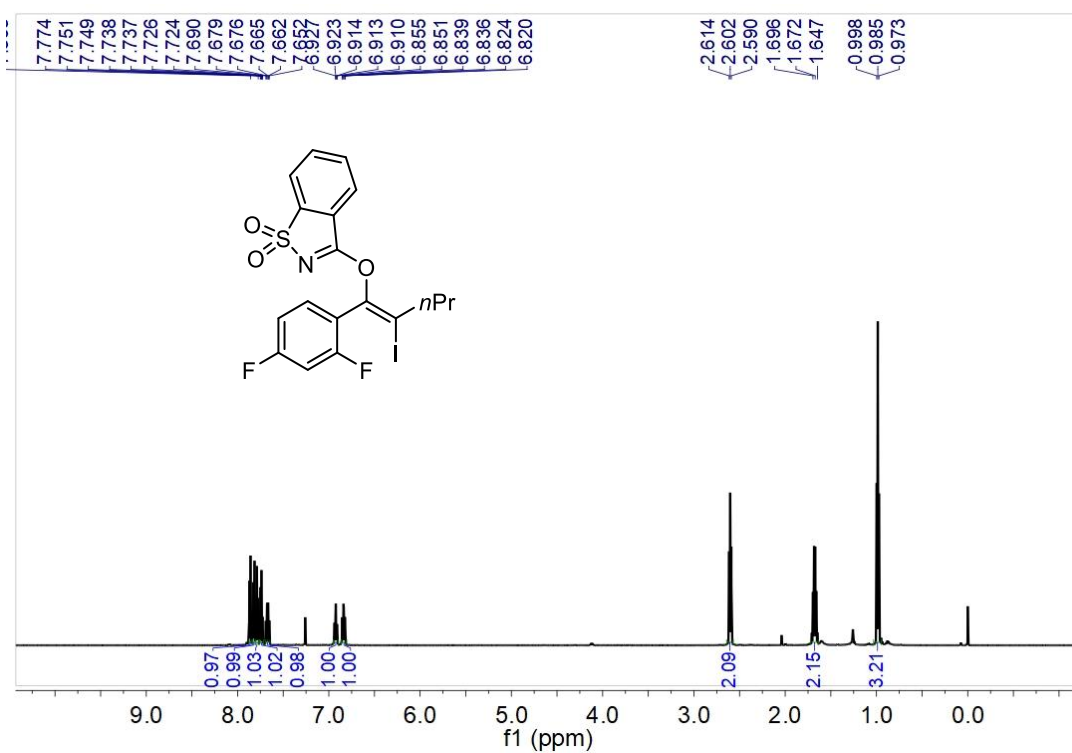

**<sup>1</sup>H NMR (600 MHz, CDCl<sub>3</sub>) spectrum of 3j.**

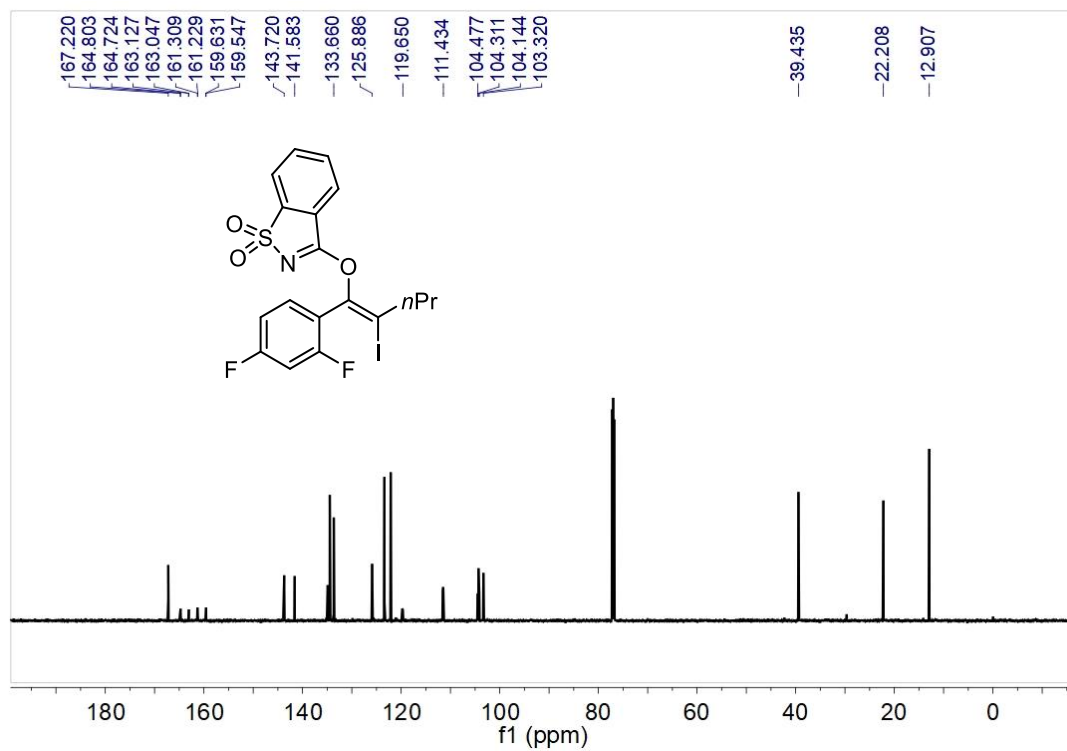

**<sup>13</sup>C NMR (150 MHz, CDCl<sub>3</sub>) spectrum of 3j.**

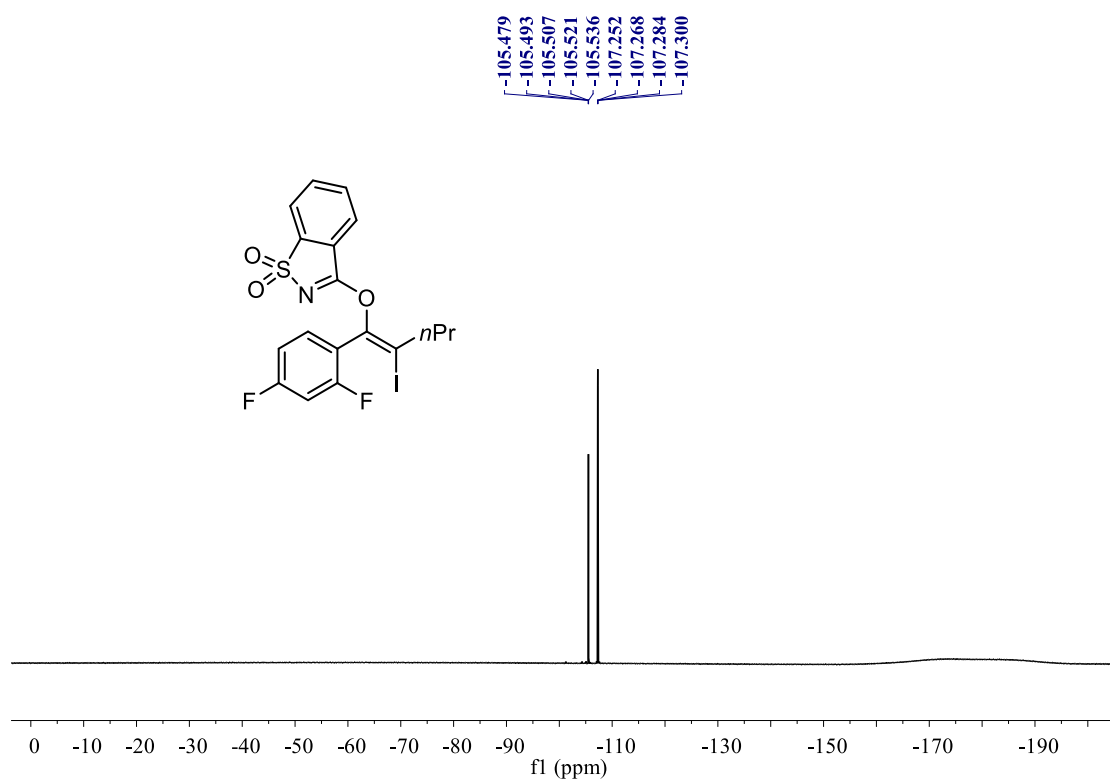

**<sup>19</sup>F NMR (565 MHz, CDCl<sub>3</sub>) spectrum of 3j.**

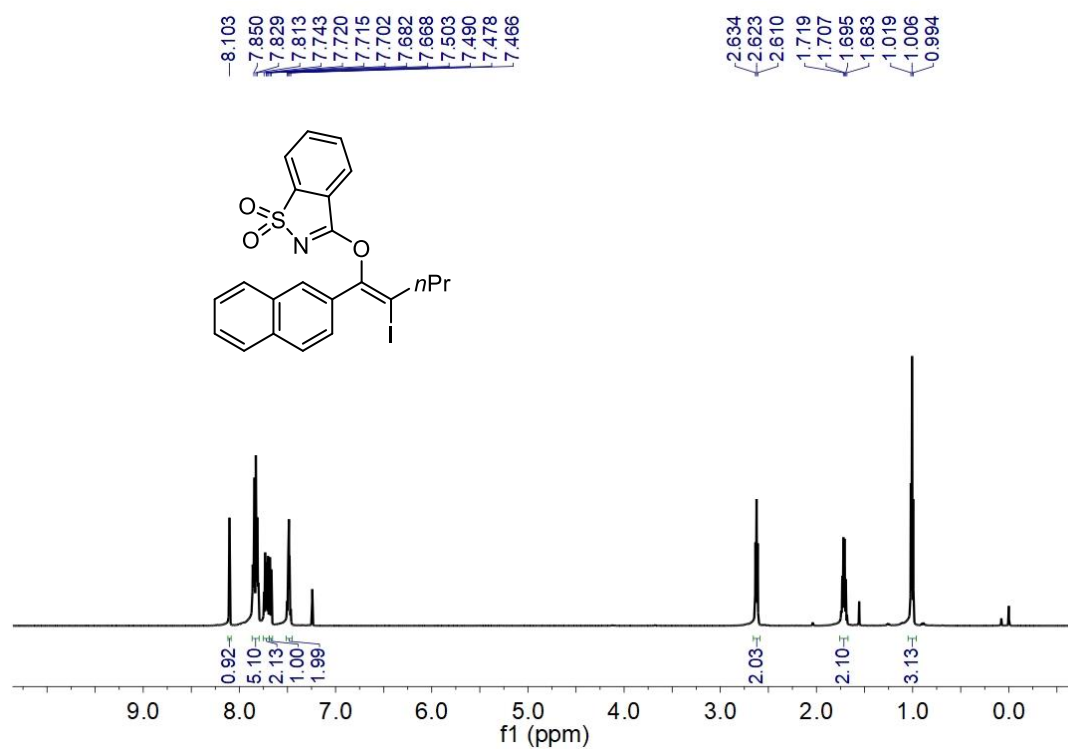

**<sup>1</sup>H NMR (600 MHz, CDCl<sub>3</sub>) spectrum of 3k.**

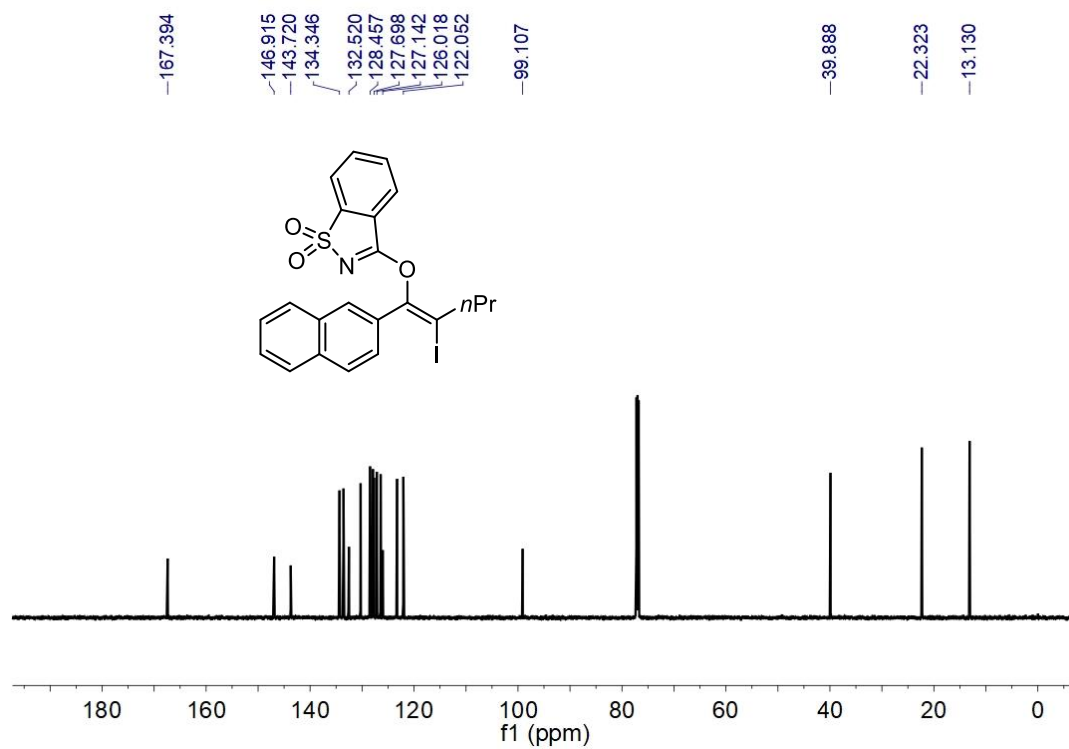

**<sup>13</sup>C NMR (150 MHz, CDCl<sub>3</sub>) spectrum of 3k.**



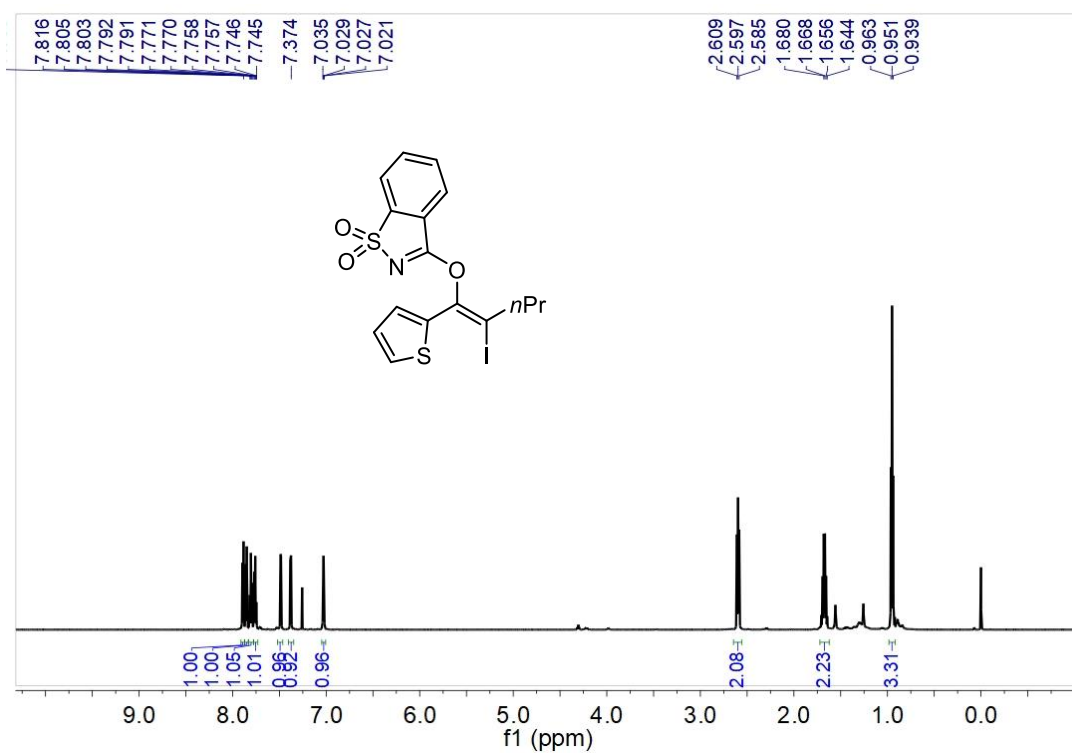

**<sup>1</sup>H NMR (600 MHz, CDCl<sub>3</sub>) spectrum of 3l.**

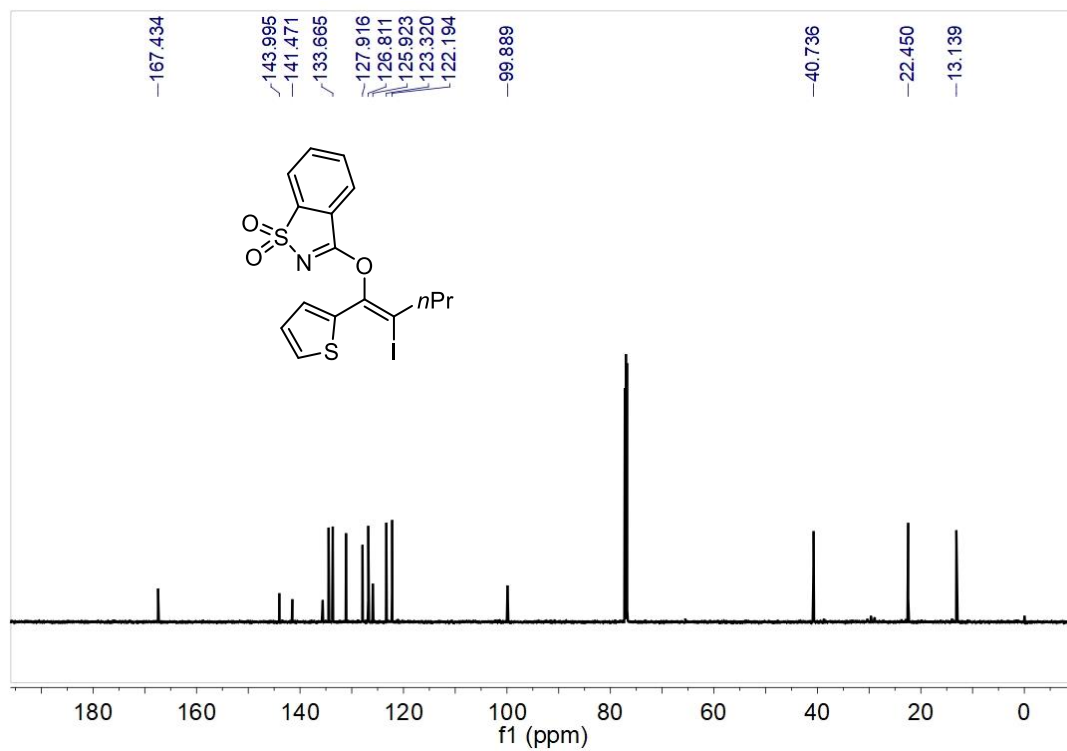

**<sup>13</sup>C NMR (150 MHz, CDCl<sub>3</sub>) spectrum of 3l.**

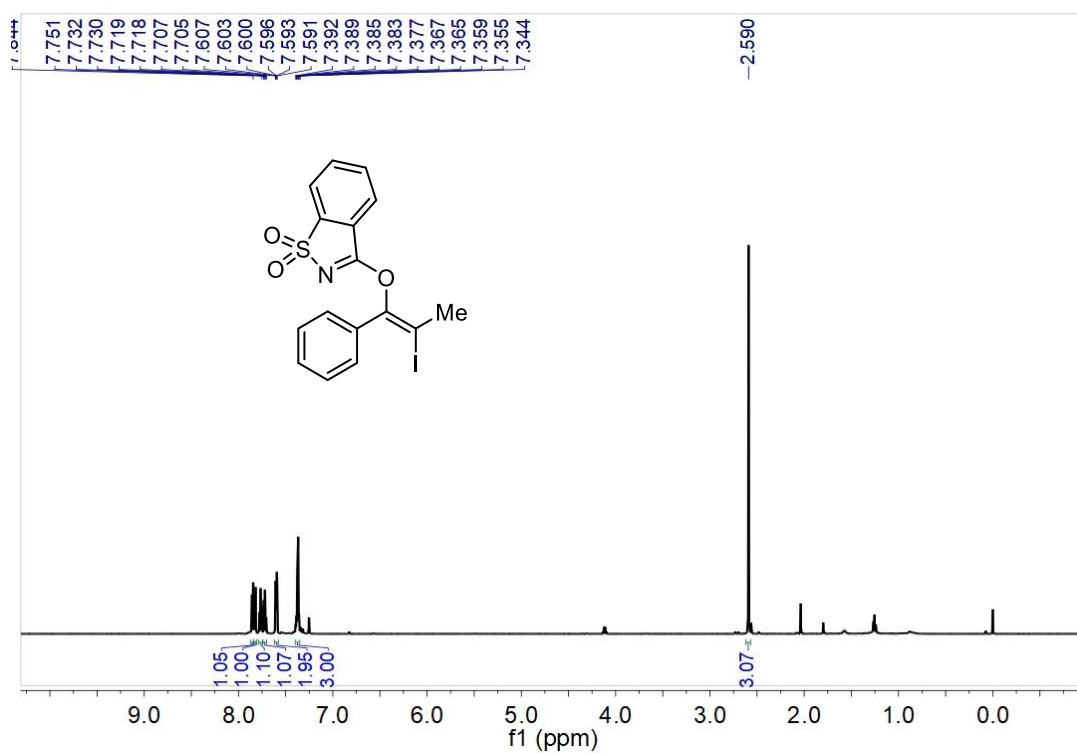

**<sup>1</sup>H NMR (600 MHz, CDCl<sub>3</sub>) spectrum of 3m.**

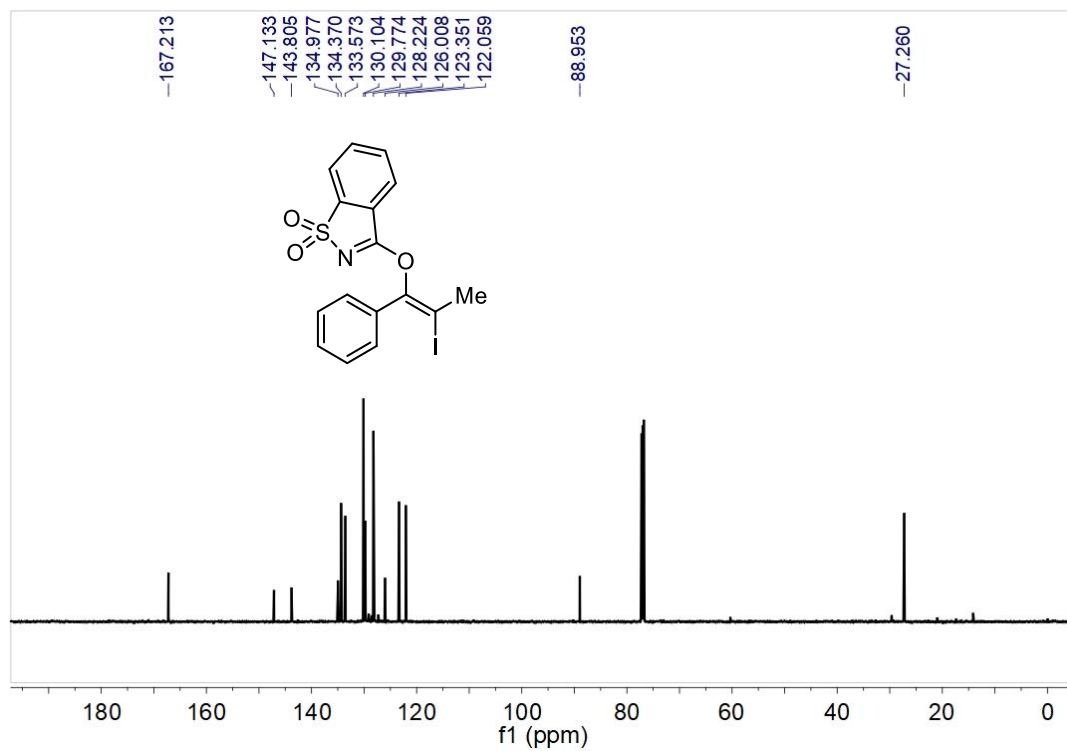

**<sup>13</sup>C NMR (150 MHz, CDCl<sub>3</sub>) spectrum of 3m.**

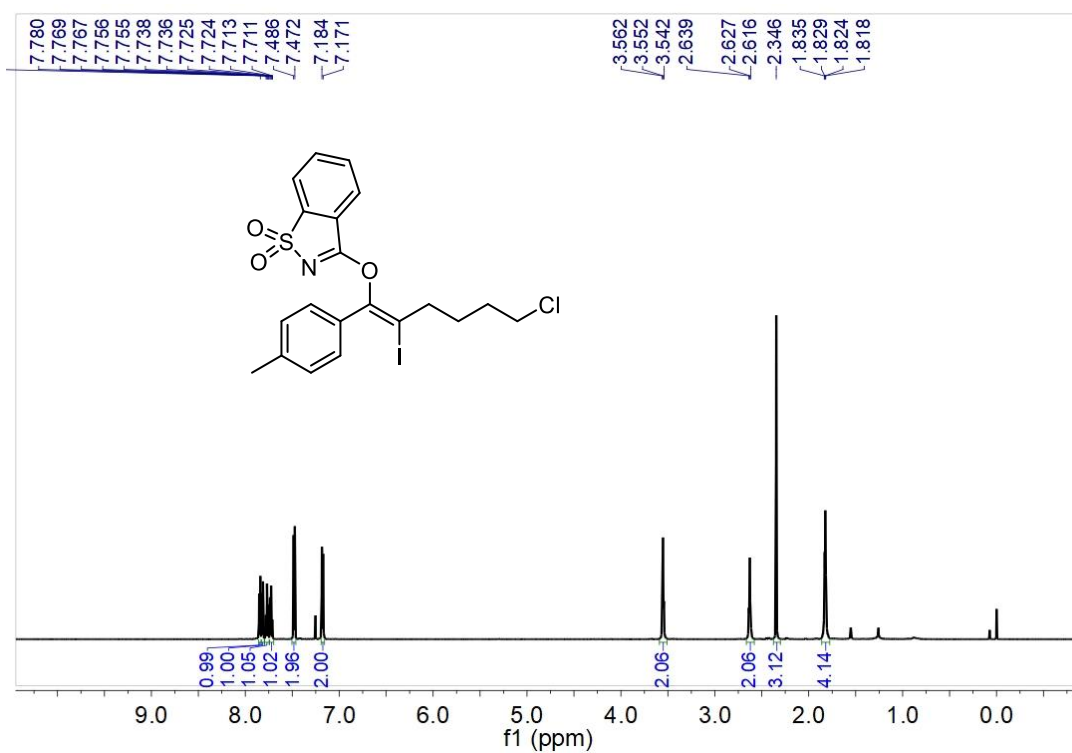

**<sup>1</sup>H NMR (600 MHz, CDCl<sub>3</sub>) spectrum of 3n.**

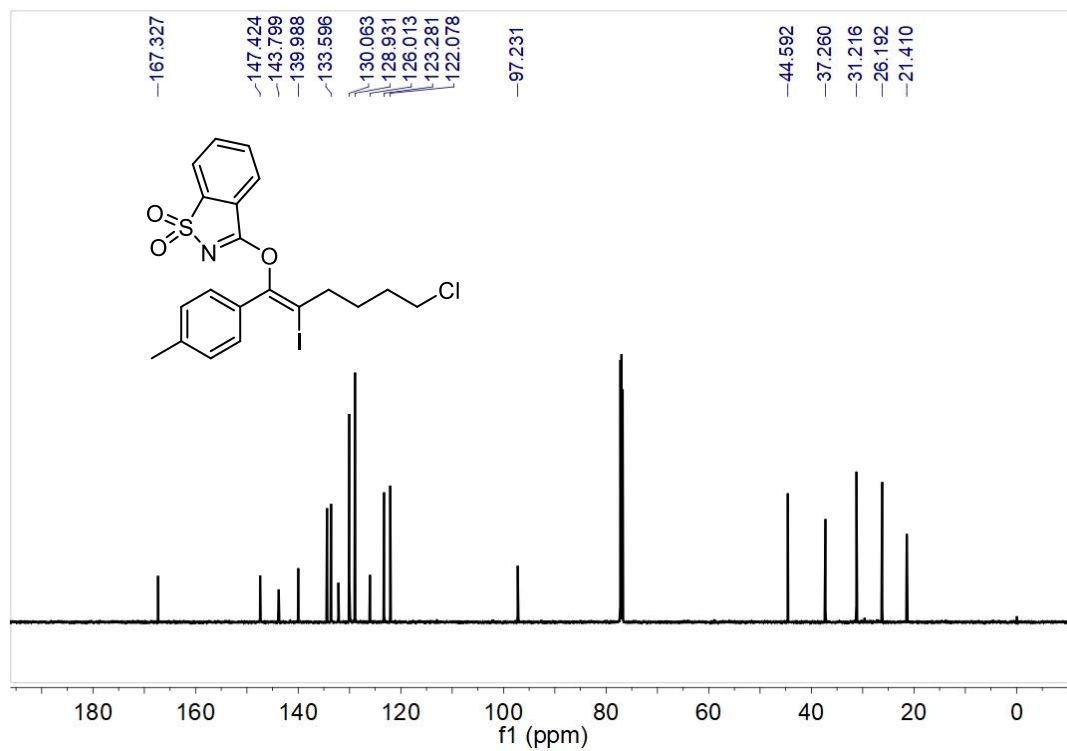

**<sup>13</sup>C NMR (150 MHz, CDCl<sub>3</sub>) spectrum of 3n.**

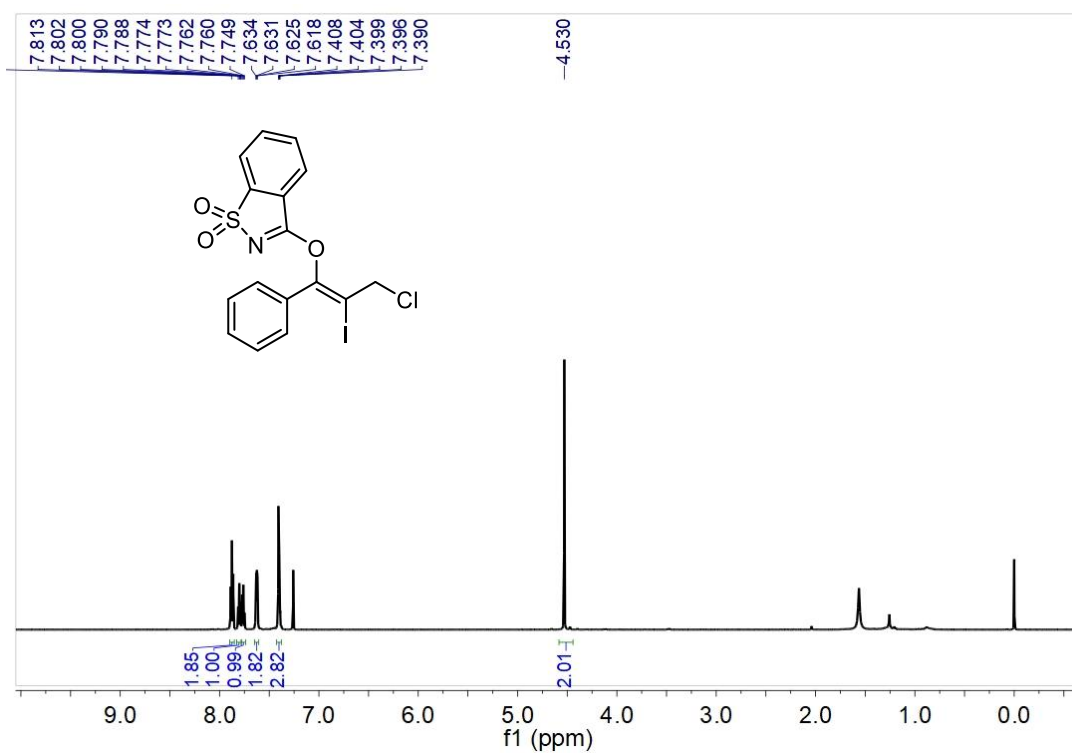

**<sup>1</sup>H NMR (600 MHz, CDCl<sub>3</sub>) spectrum of 3o.**

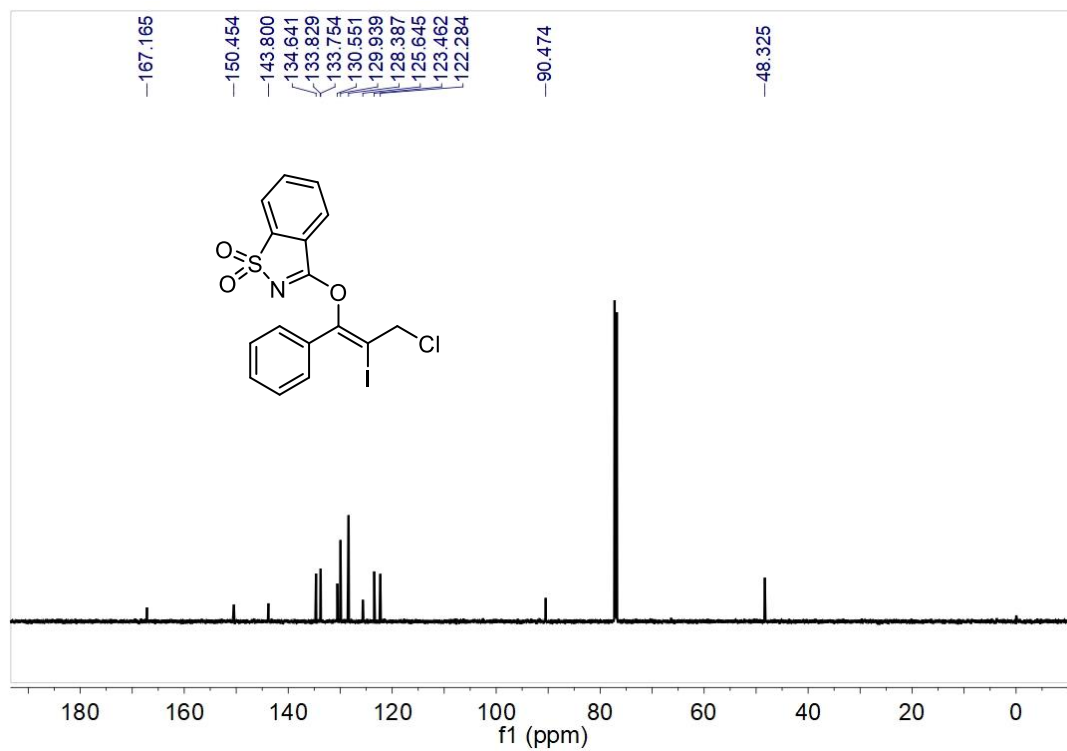

**<sup>13</sup>C NMR (150 MHz, CDCl<sub>3</sub>) spectrum of 3o.**

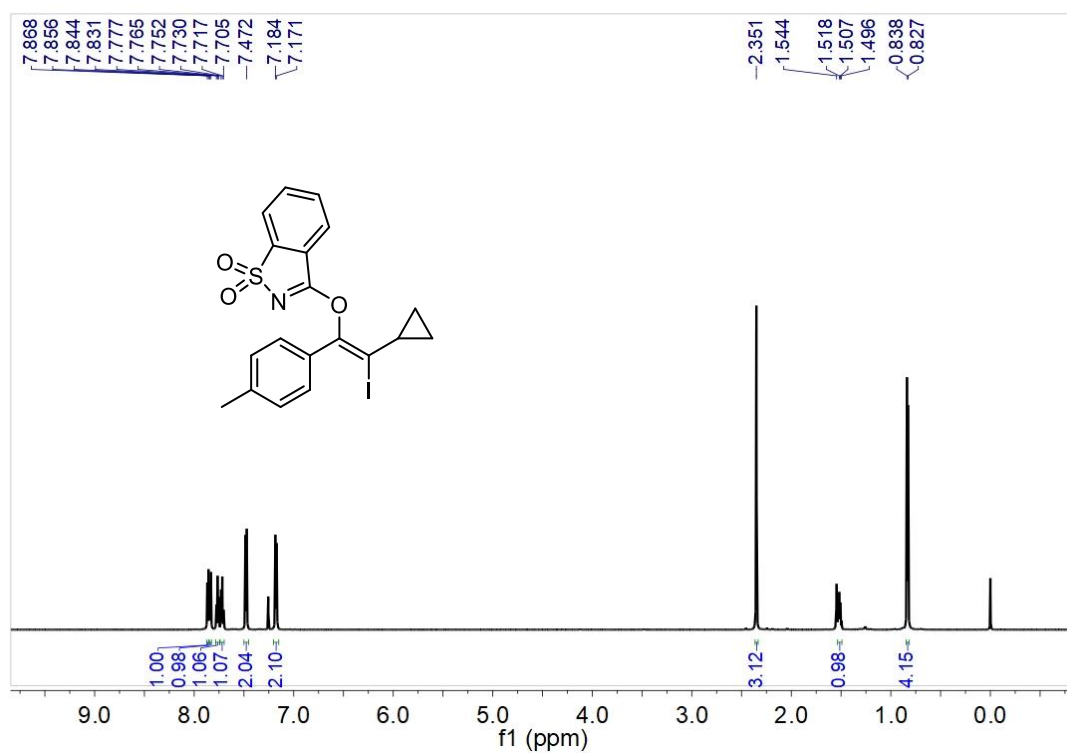

**<sup>1</sup>H NMR (600 MHz, CDCl<sub>3</sub>) spectrum of 3p.**

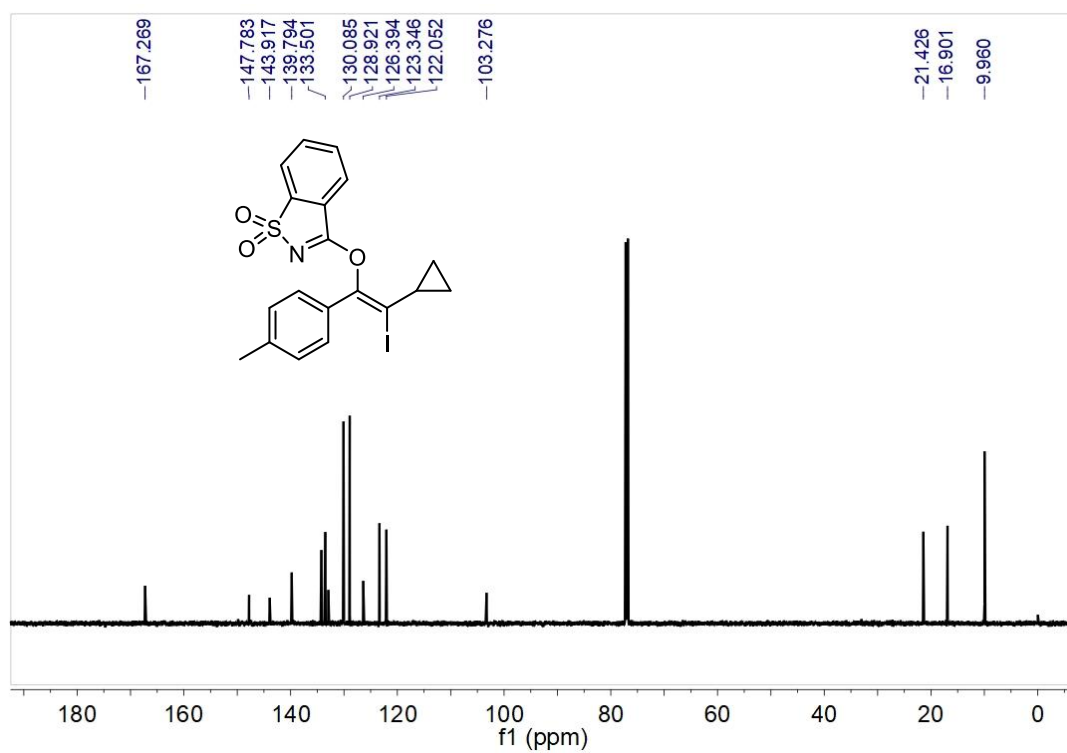

**<sup>13</sup>C NMR (150 MHz, CDCl<sub>3</sub>) spectrum of 3p.**

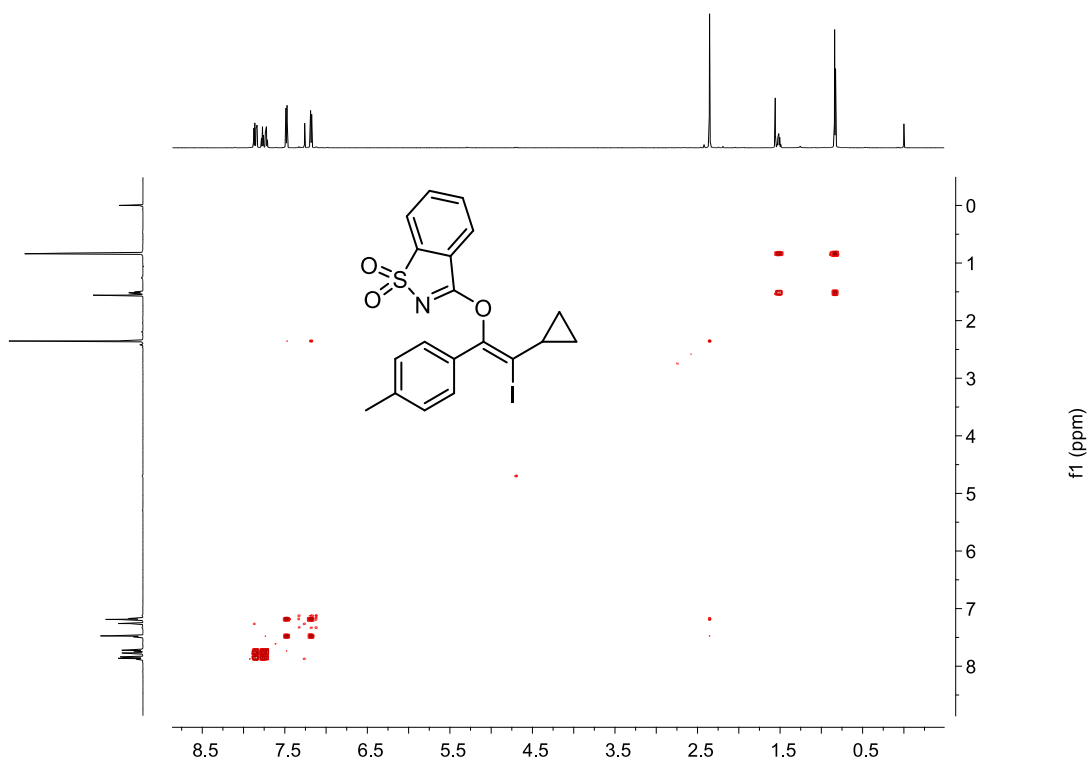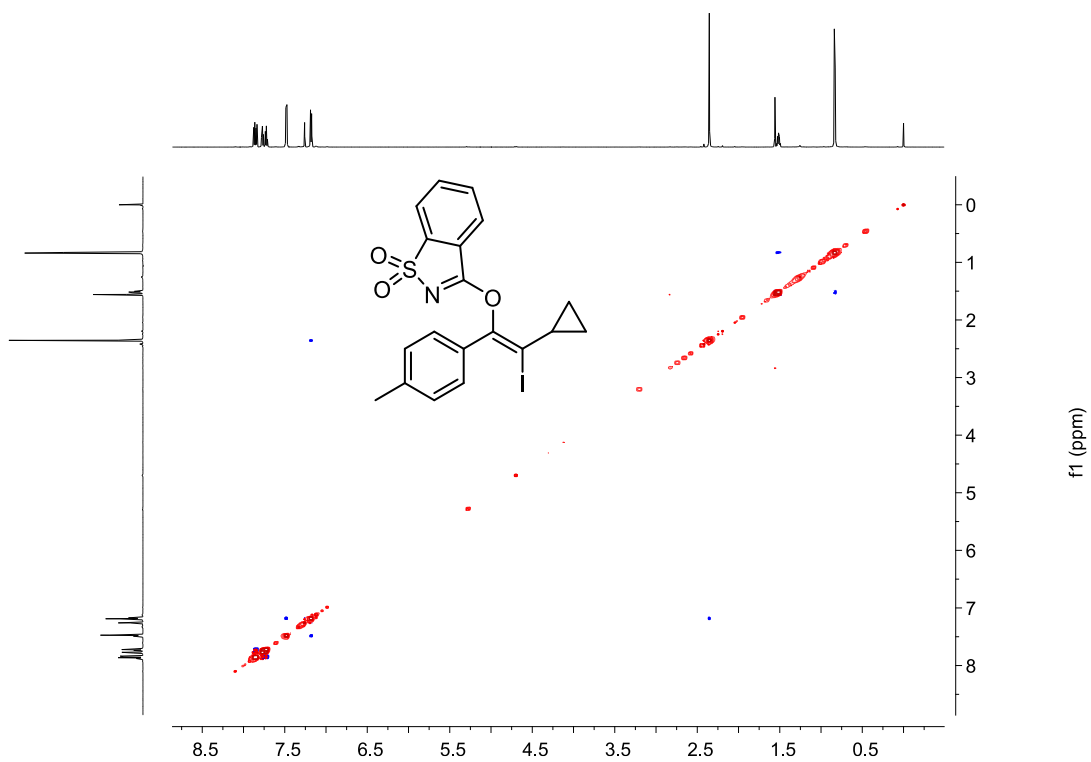

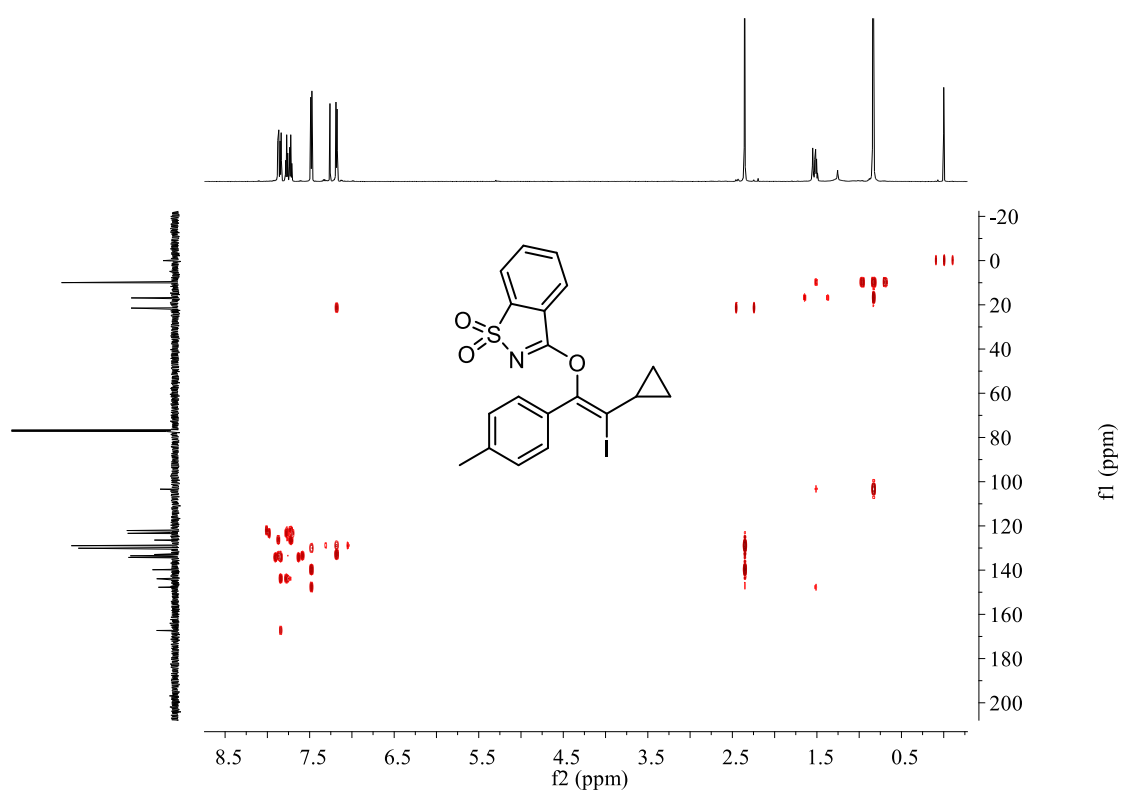

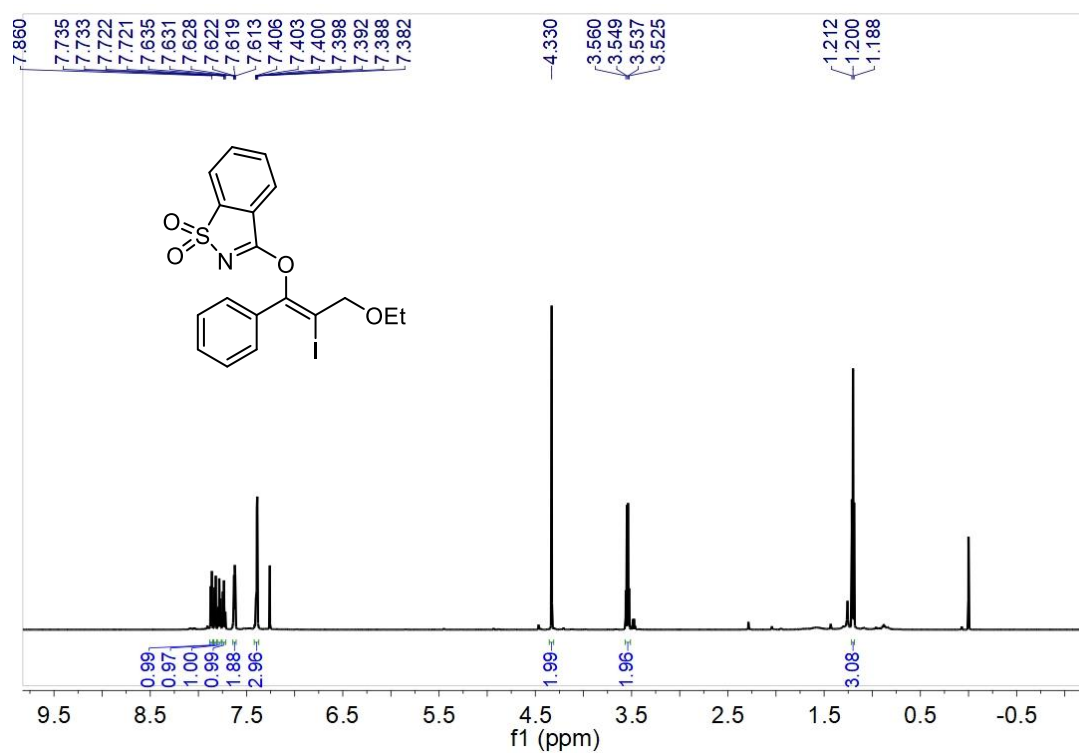

**<sup>1</sup>H NMR (600 MHz, CDCl<sub>3</sub>) spectrum of 3q.**

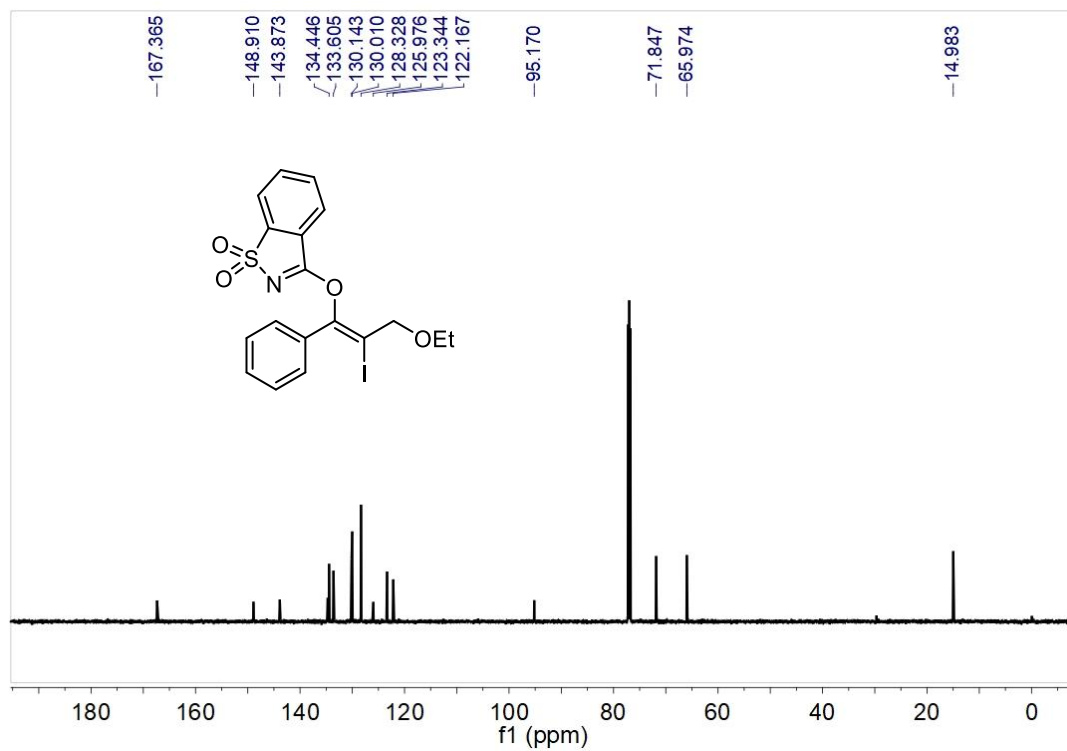

**<sup>13</sup>C NMR (150 MHz, CDCl<sub>3</sub>) spectrum of 3q.**



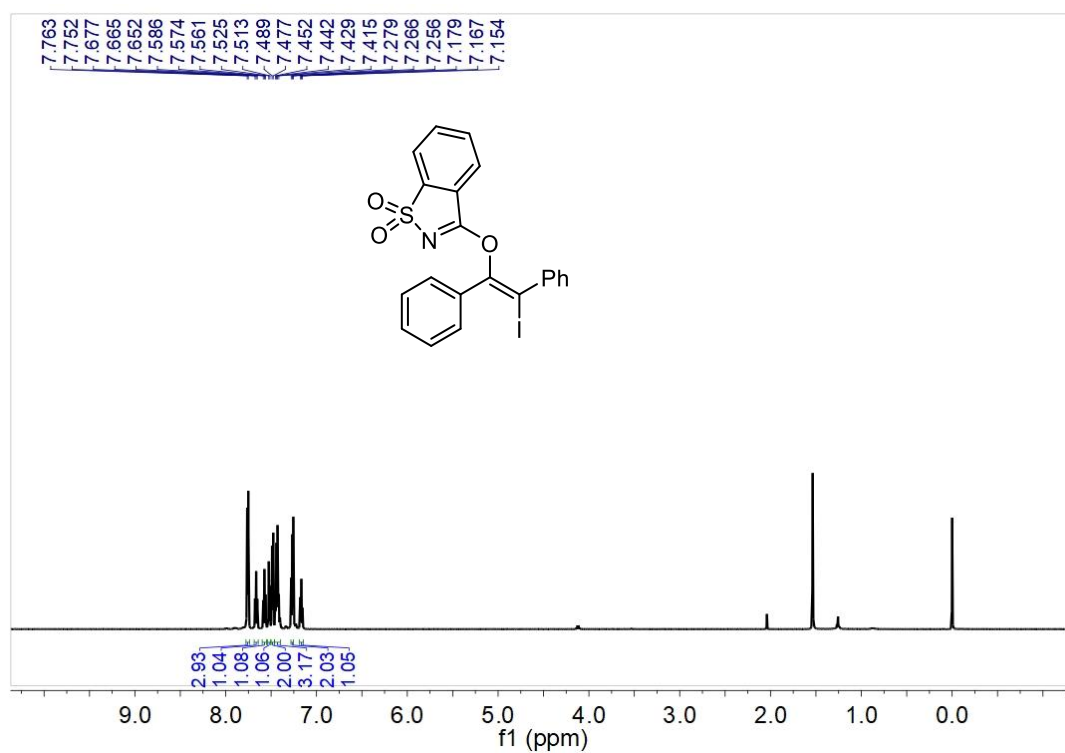

**<sup>1</sup>H NMR (600 MHz, CDCl<sub>3</sub>) spectrum of 3r.**

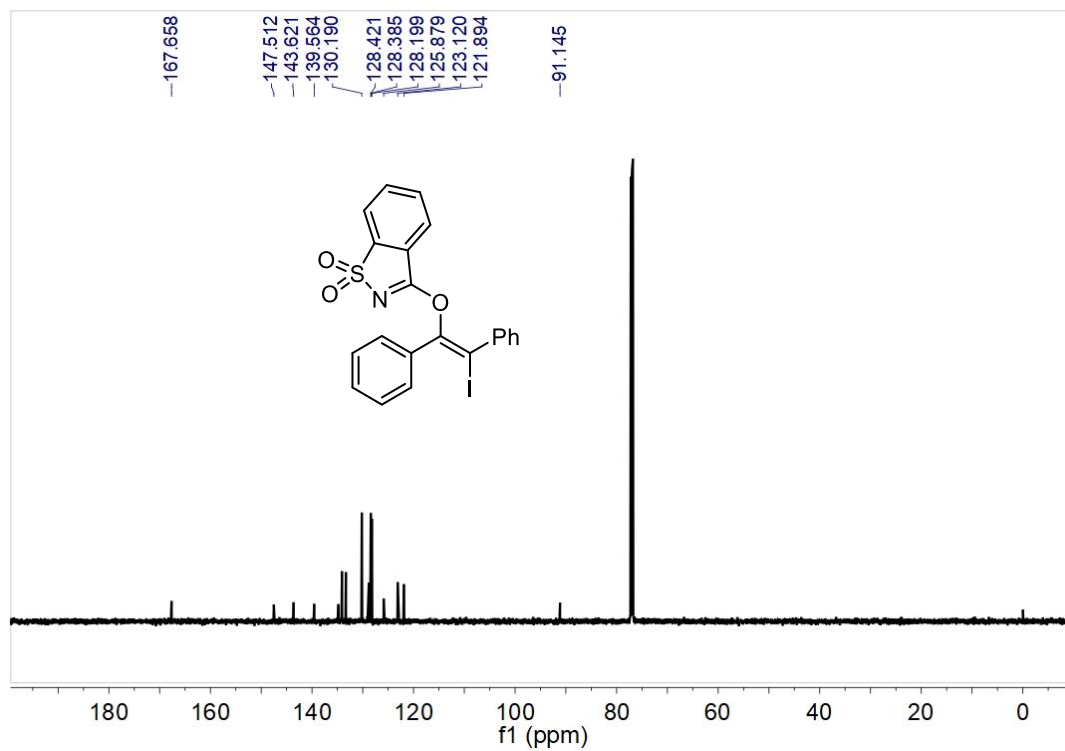

**<sup>13</sup>C NMR (150 MHz, CDCl<sub>3</sub>) spectrum of 3r.**

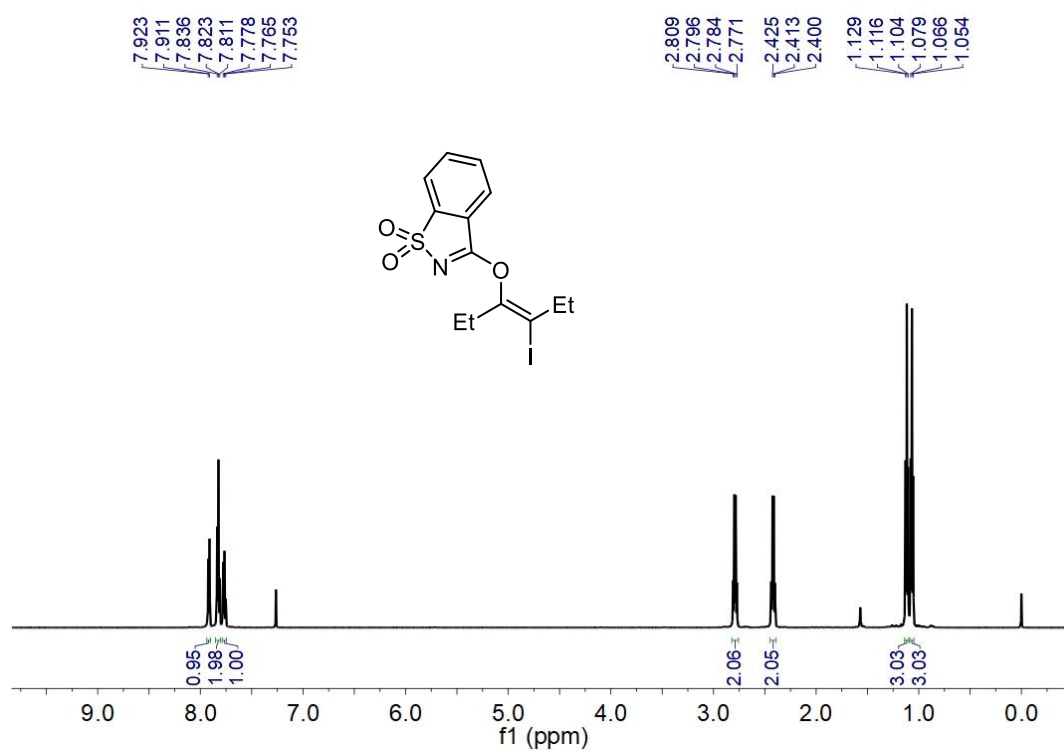

**<sup>1</sup>H NMR (600 MHz, CDCl<sub>3</sub>) spectrum of 3s.**

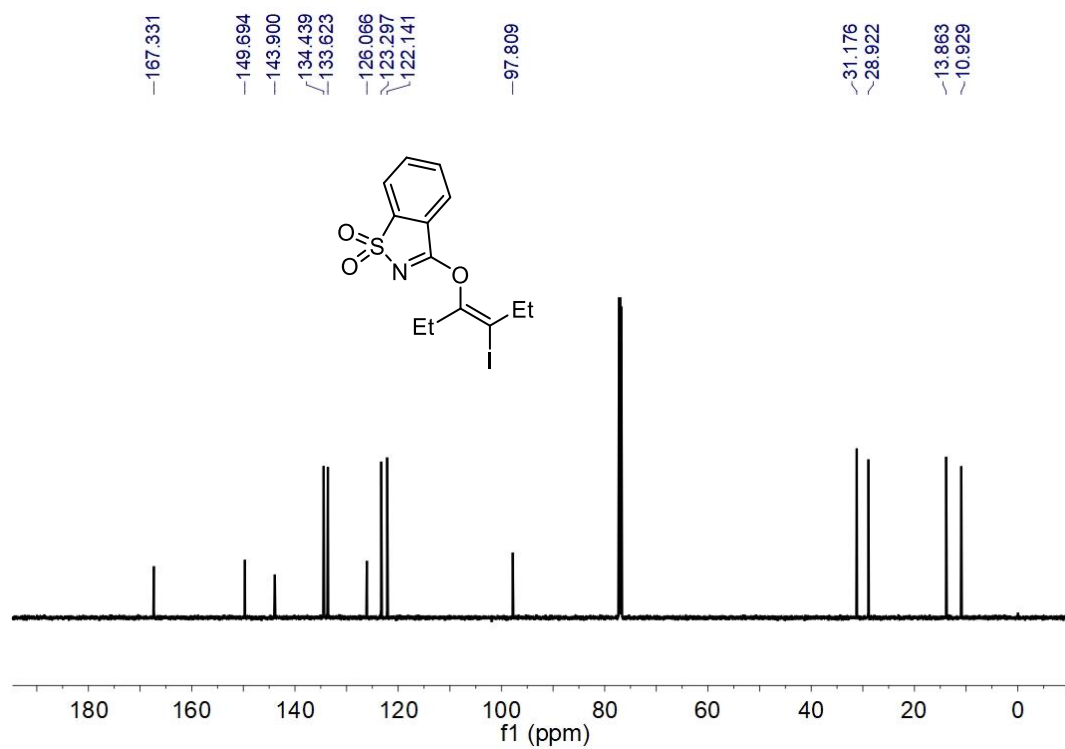

**<sup>13</sup>C NMR (150 MHz, CDCl<sub>3</sub>) spectrum of 3s.**

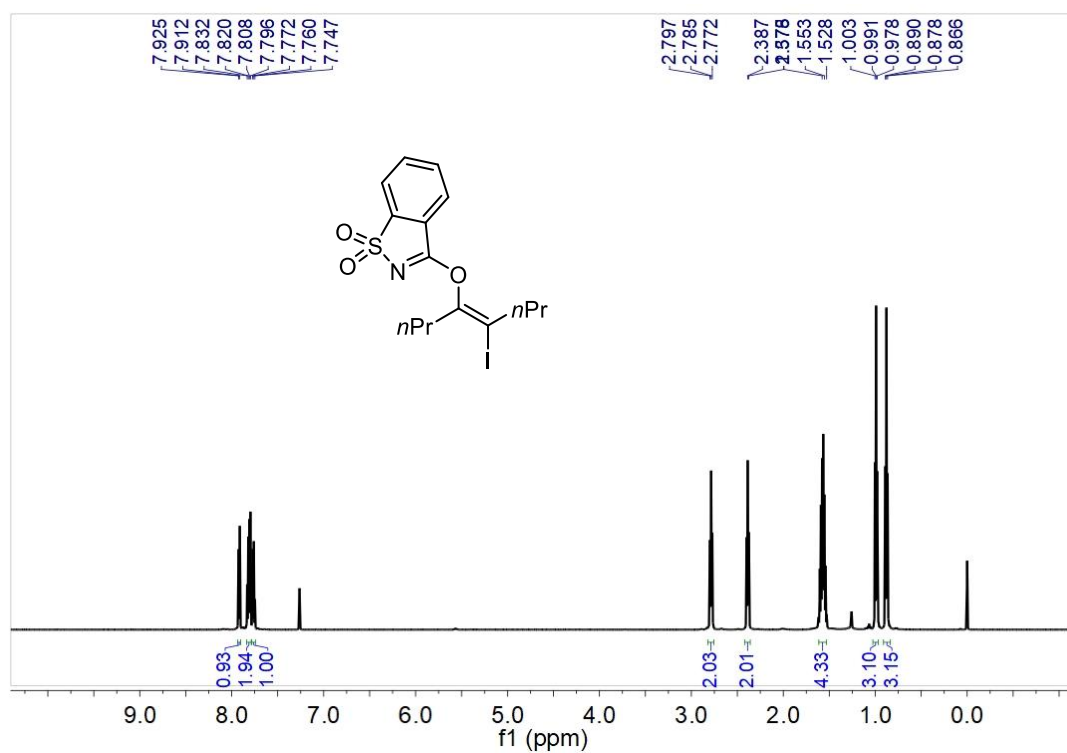

**<sup>1</sup>H NMR (600 MHz, CDCl<sub>3</sub>) spectrum of 3t.**

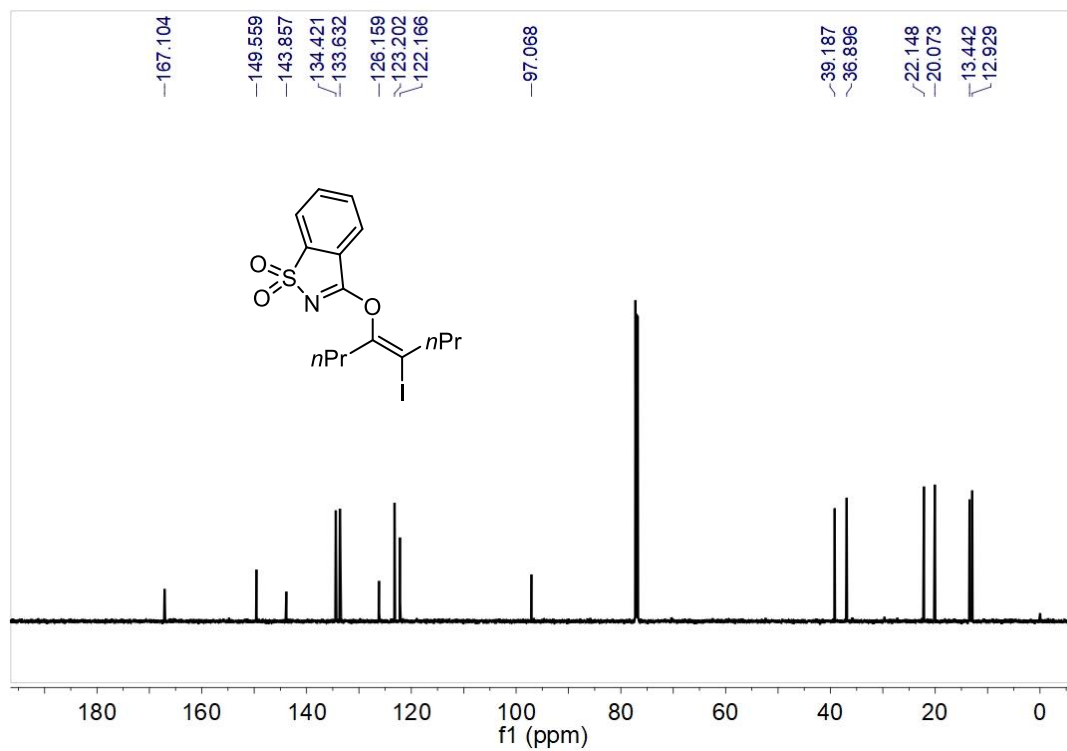

**<sup>13</sup>C NMR (150 MHz, CDCl<sub>3</sub>) spectrum of 3t.**

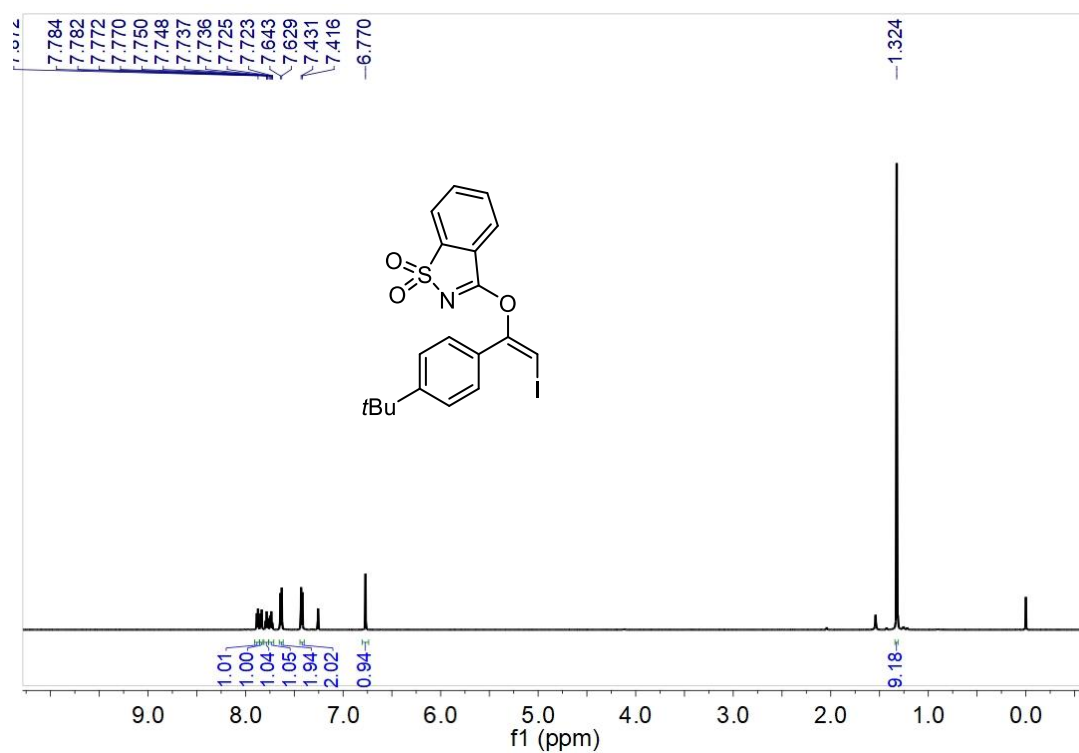

**<sup>1</sup>H NMR (600 MHz, CDCl<sub>3</sub>) spectrum of 3u.**

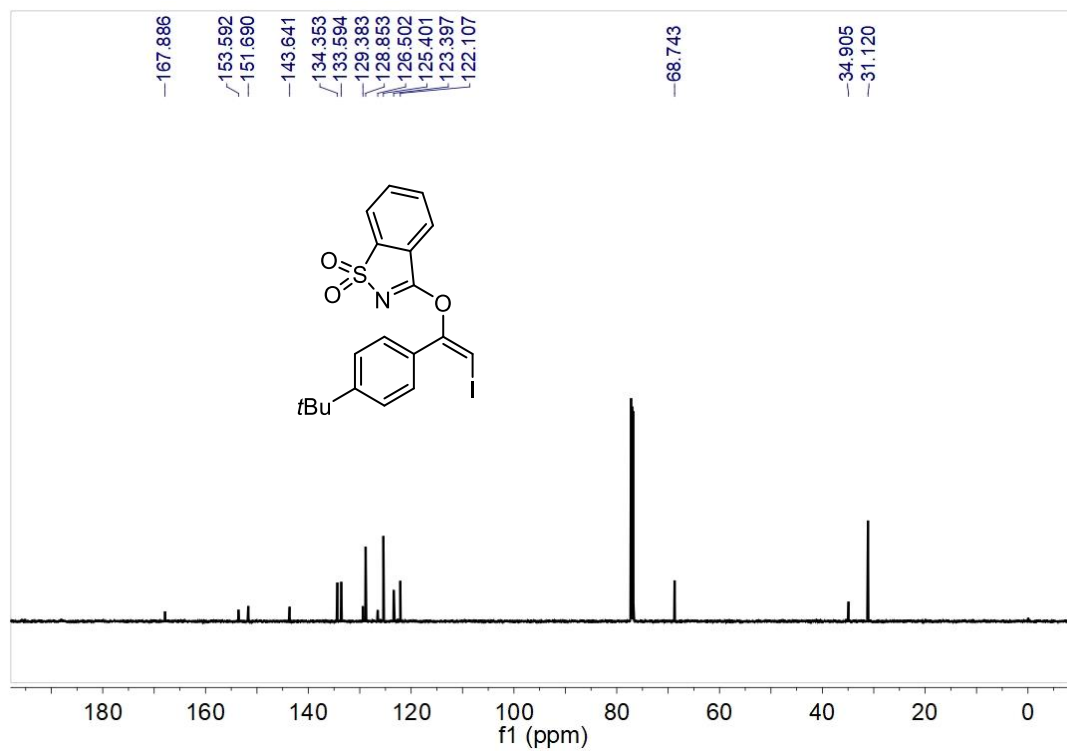

**<sup>13</sup>C NMR (150 MHz, CDCl<sub>3</sub>) spectrum of 3u.**

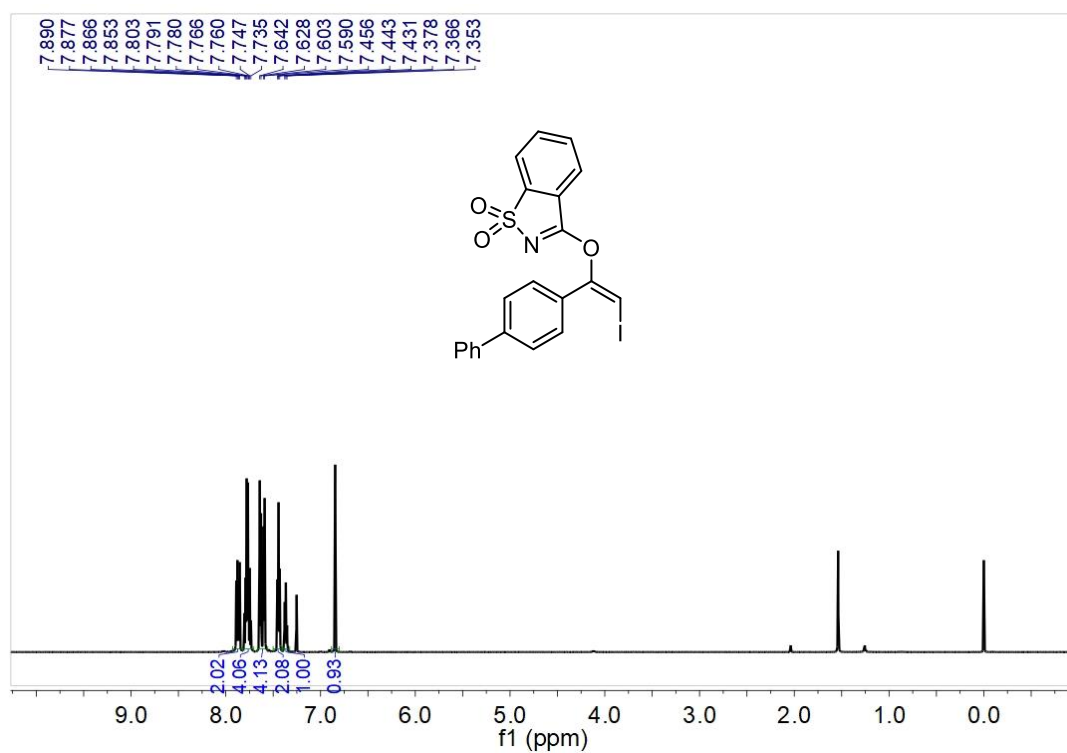

**<sup>1</sup>H NMR (600 MHz, CDCl<sub>3</sub>) spectrum of 3v.**

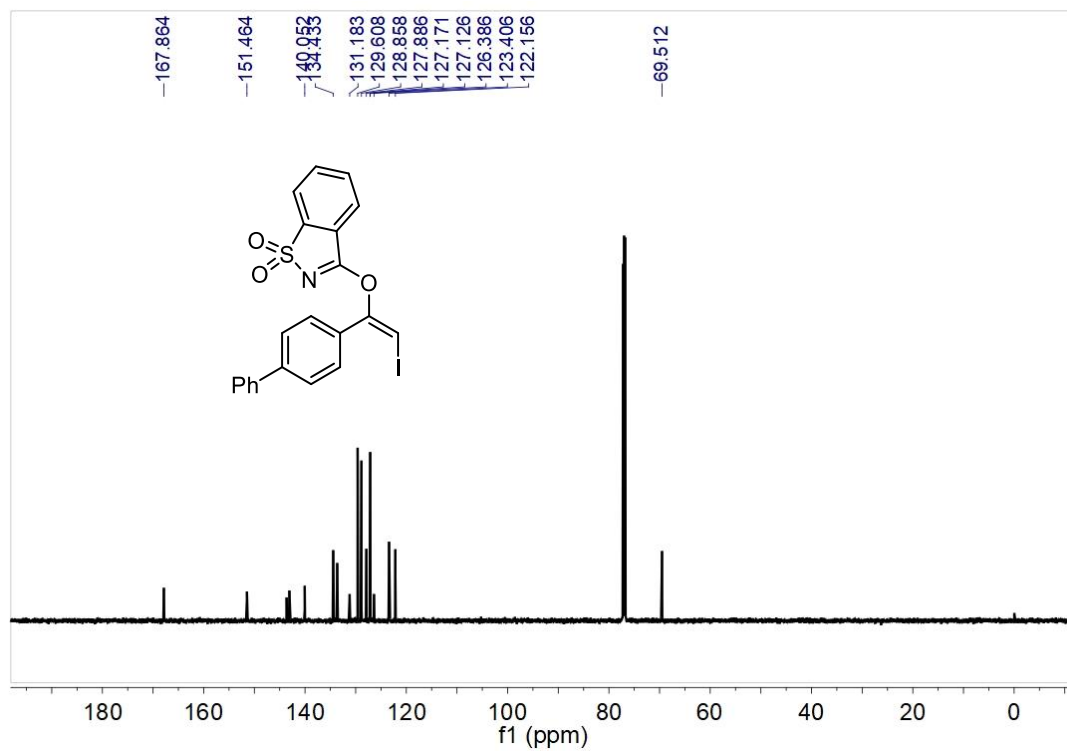

**<sup>13</sup>C NMR (150 MHz, CDCl<sub>3</sub>) spectrum of 3v.**

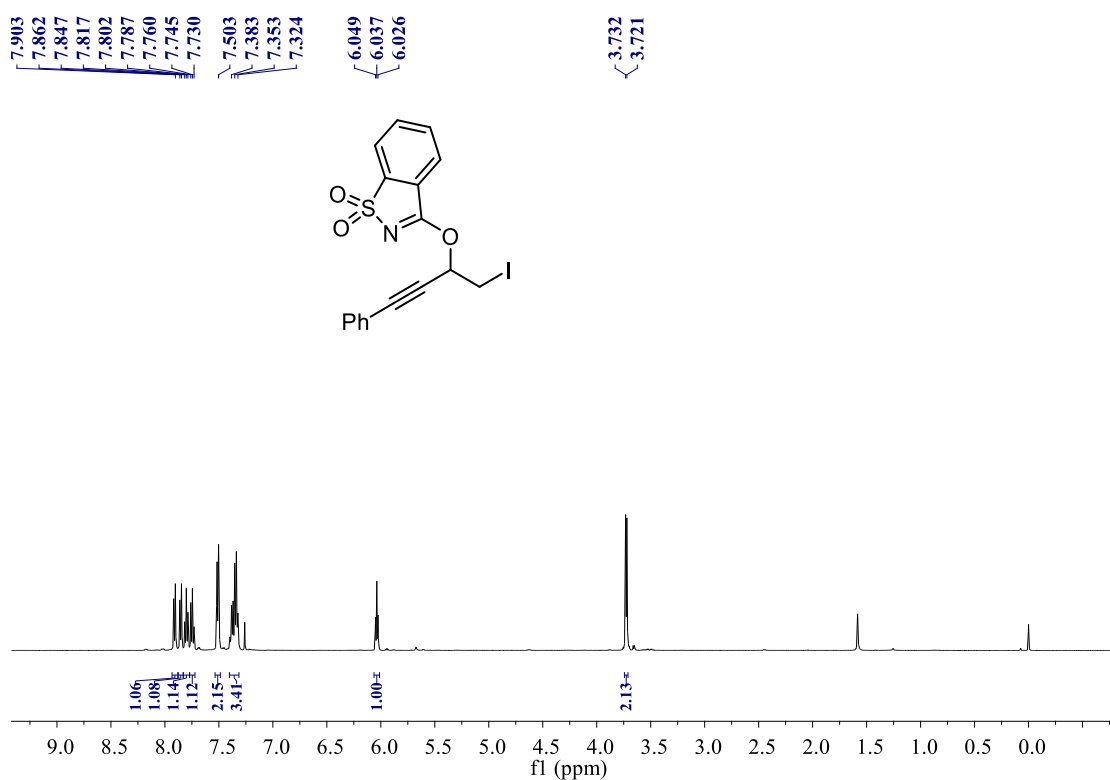

**<sup>1</sup>H NMR (500 MHz, CDCl<sub>3</sub>) spectrum of 4a.**

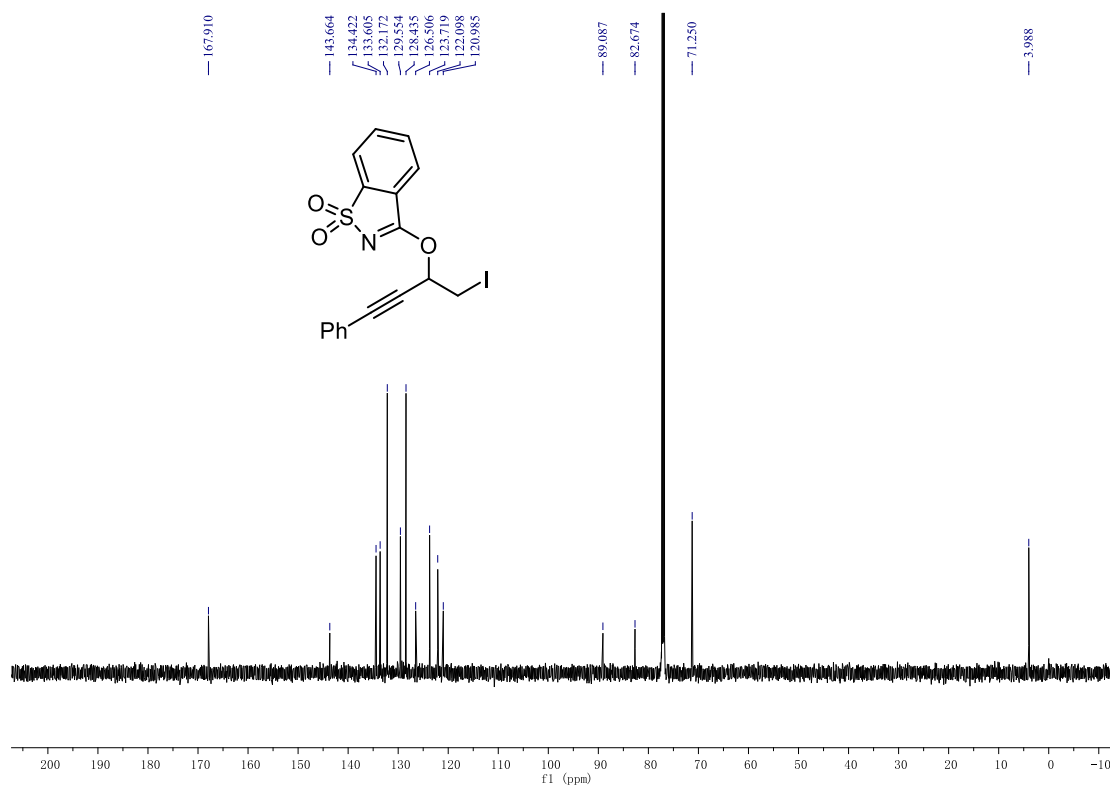

**<sup>13</sup>C NMR (150 MHz, CDCl<sub>3</sub>) spectrum of 4a.**

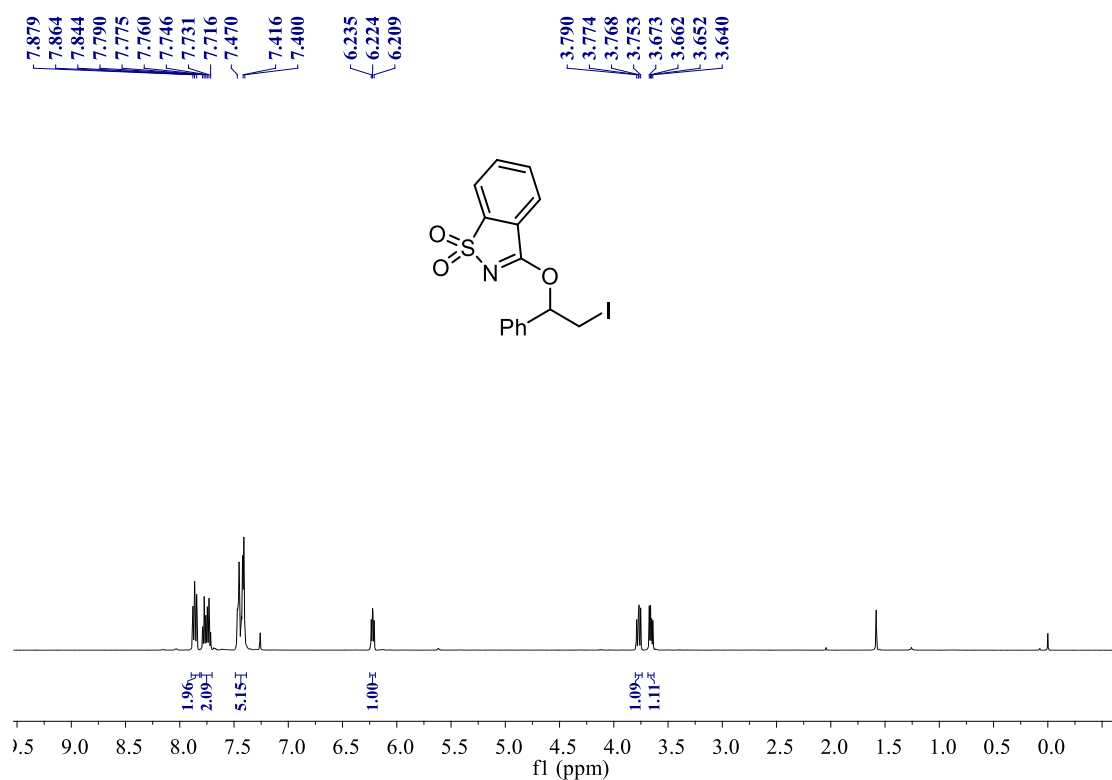

**<sup>1</sup>H NMR (500 MHz, CDCl<sub>3</sub>) spectrum of 4b.**

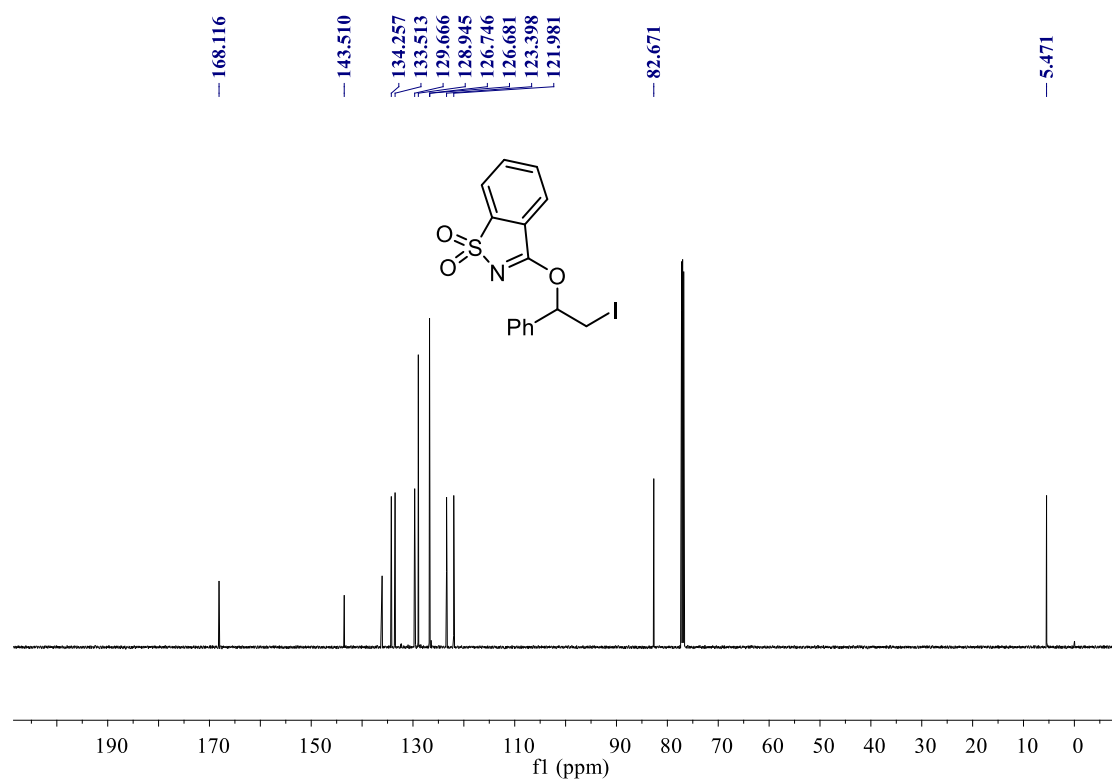

**<sup>13</sup>C NMR (500 MHz, CDCl<sub>3</sub>) spectrum of 4b.**

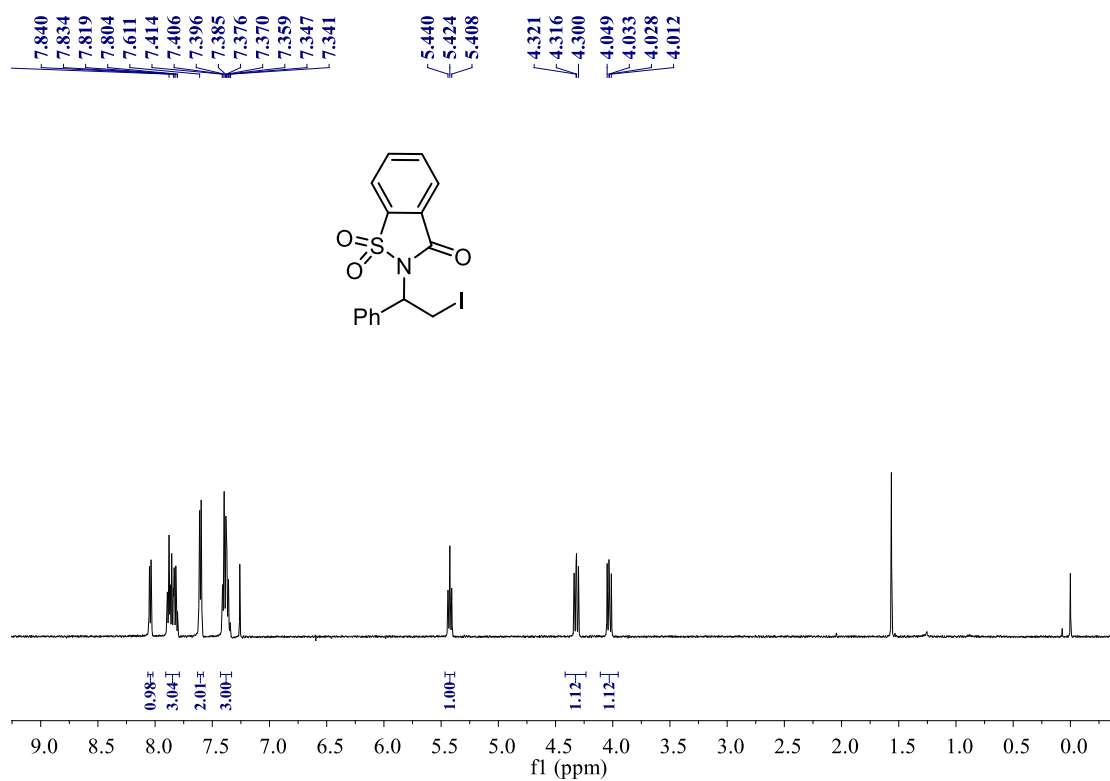

**<sup>1</sup>H NMR (500 MHz, CDCl<sub>3</sub>) spectrum of 4b'.**

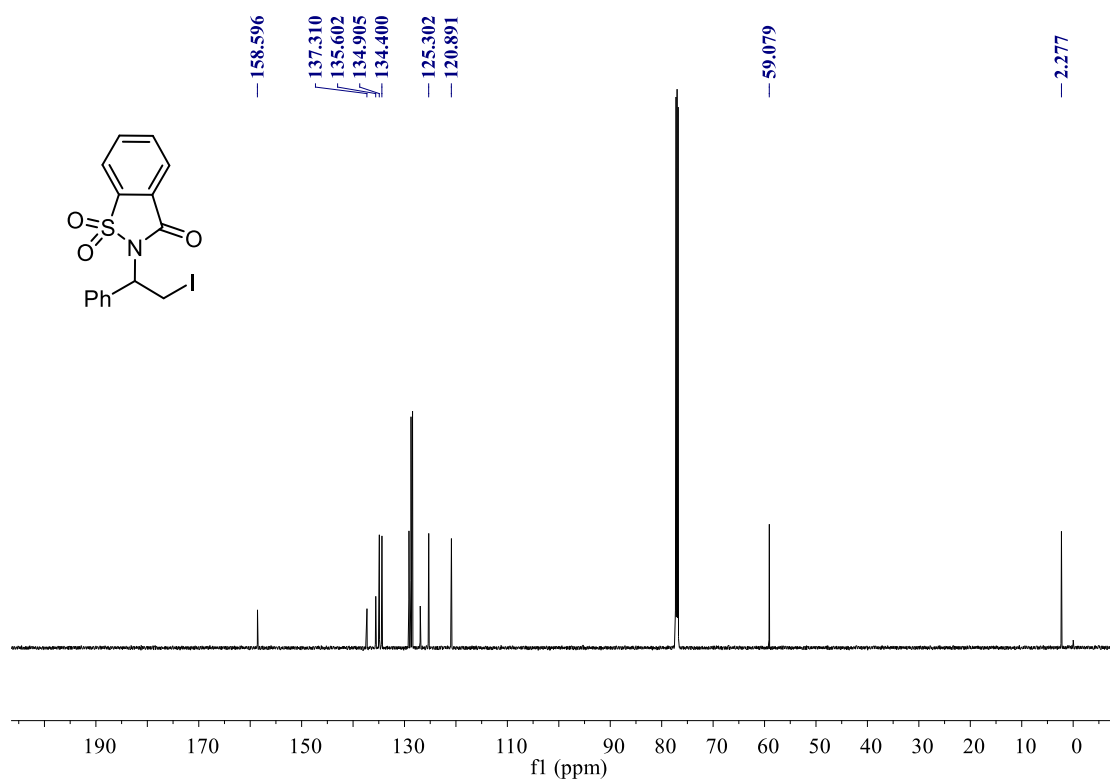

**<sup>13</sup>C NMR (150 MHz, CDCl<sub>3</sub>) spectrum of 4b'.**



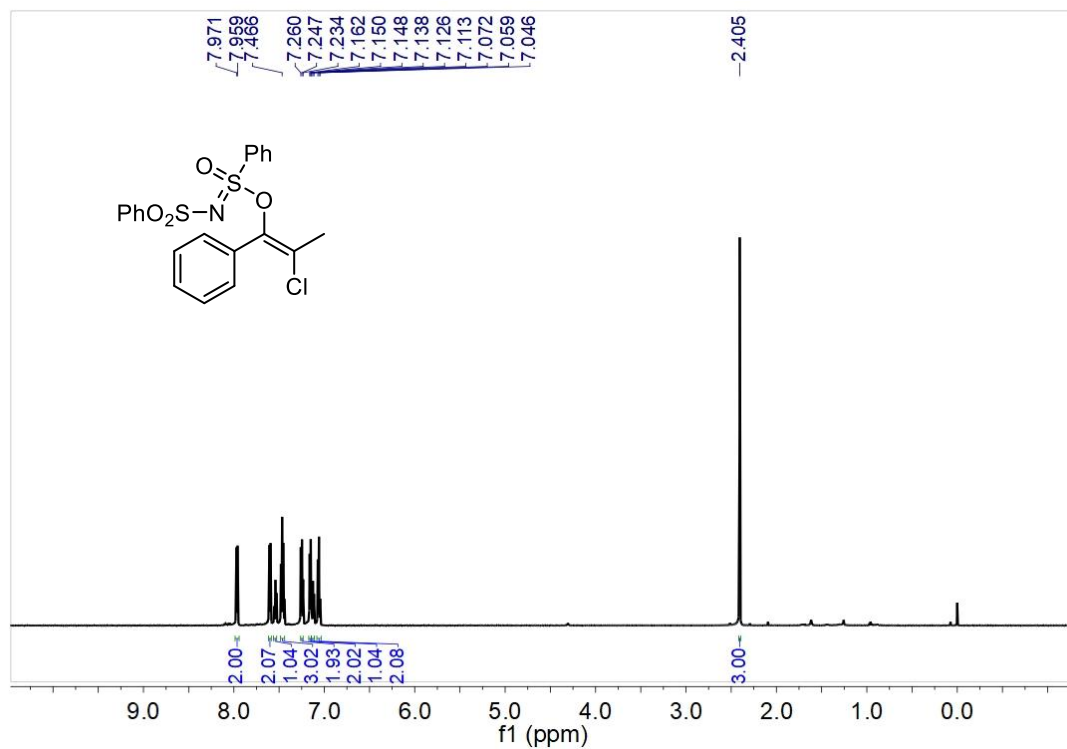

**<sup>1</sup>H NMR (600 MHz, CDCl<sub>3</sub>) spectrum of 5a.**

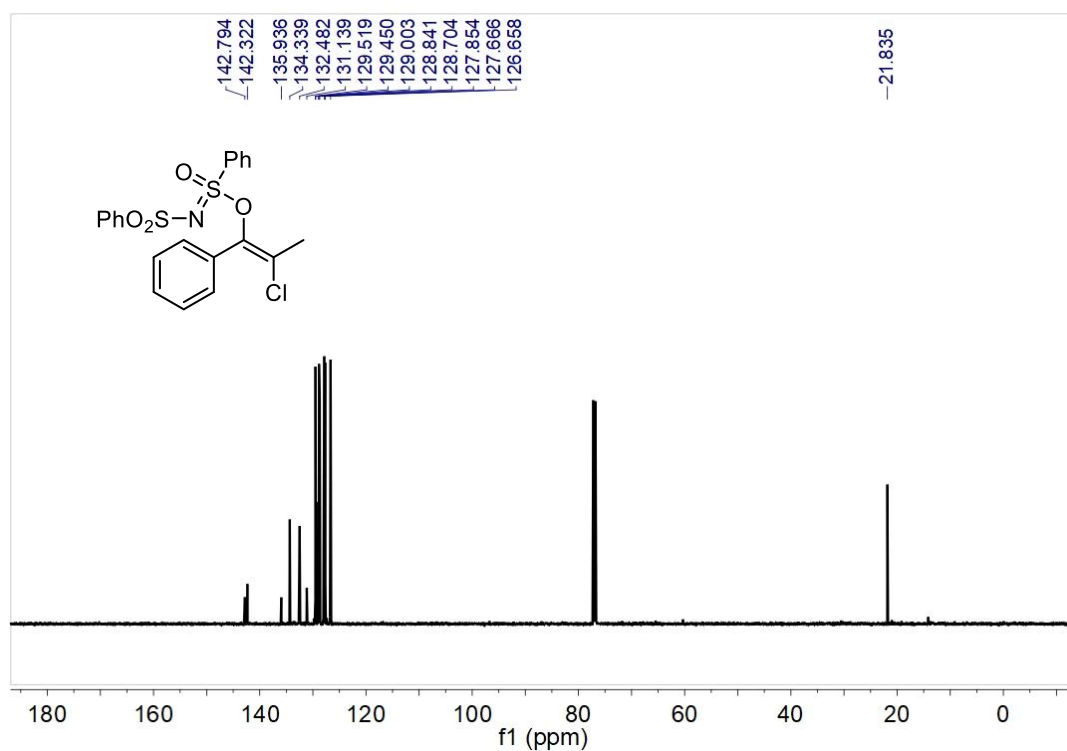

**<sup>13</sup>C NMR (150 MHz, CDCl<sub>3</sub>) spectrum of 5a.**

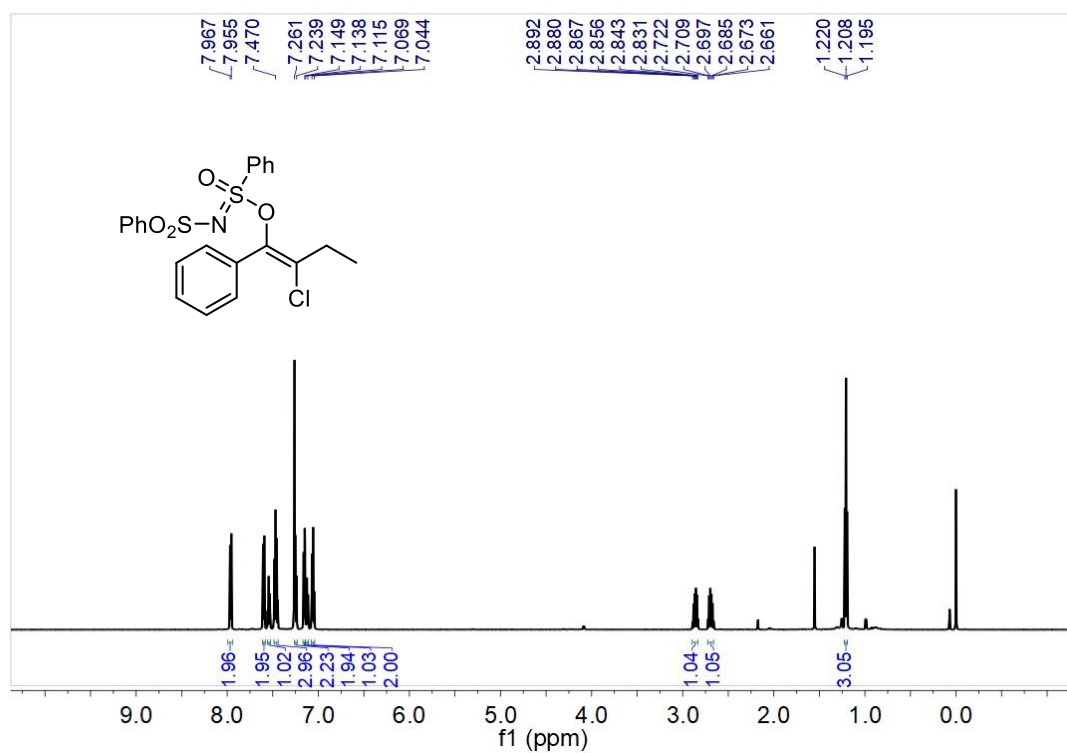

**<sup>1</sup>H NMR (600 MHz, CDCl<sub>3</sub>) spectrum of 5b.**

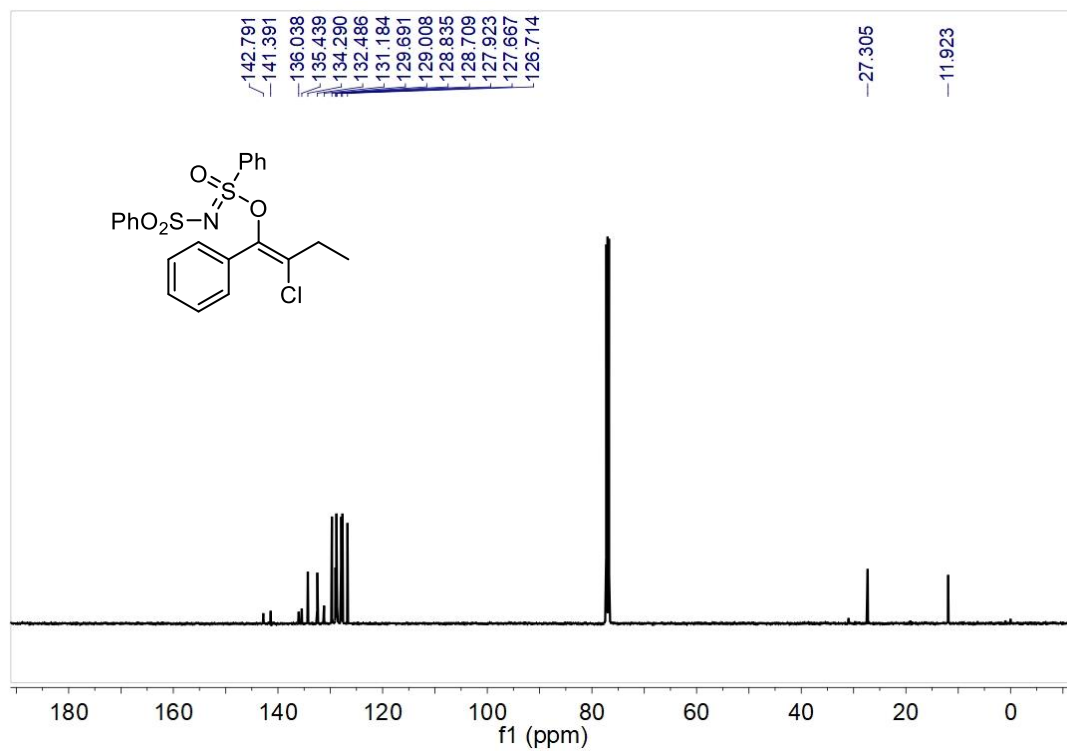

**<sup>13</sup>C NMR (125 MHz, CDCl<sub>3</sub>) spectrum of 5b.**

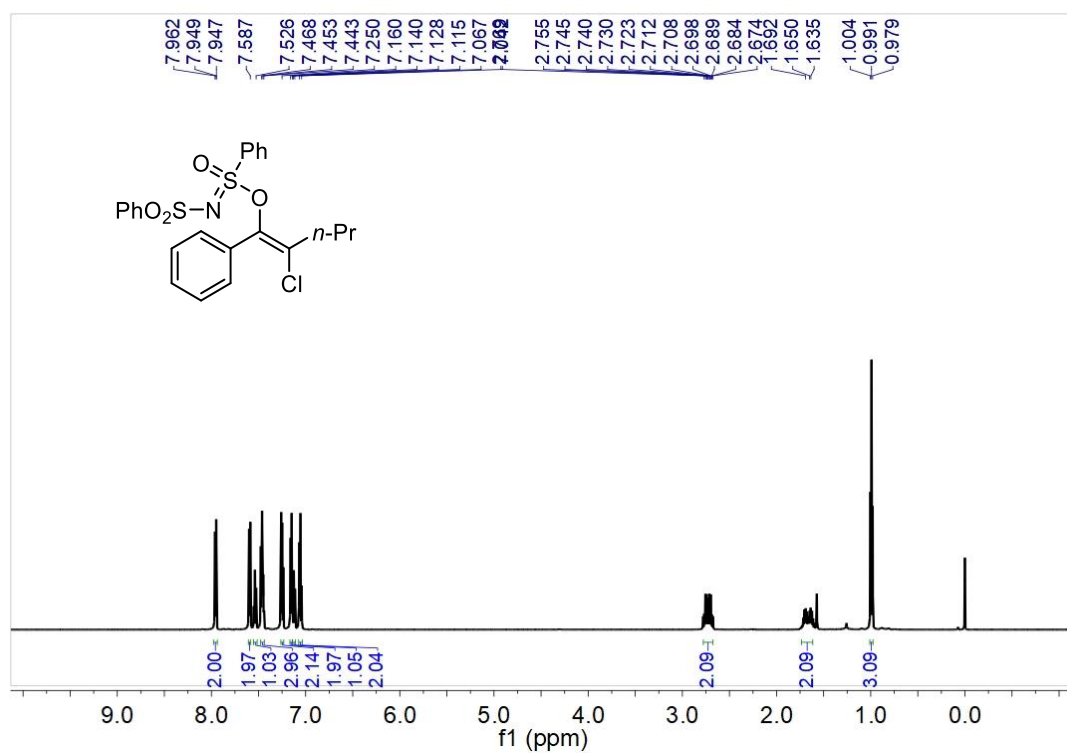

**<sup>1</sup>H NMR (600 MHz, CDCl<sub>3</sub>) spectrum of 5c.**

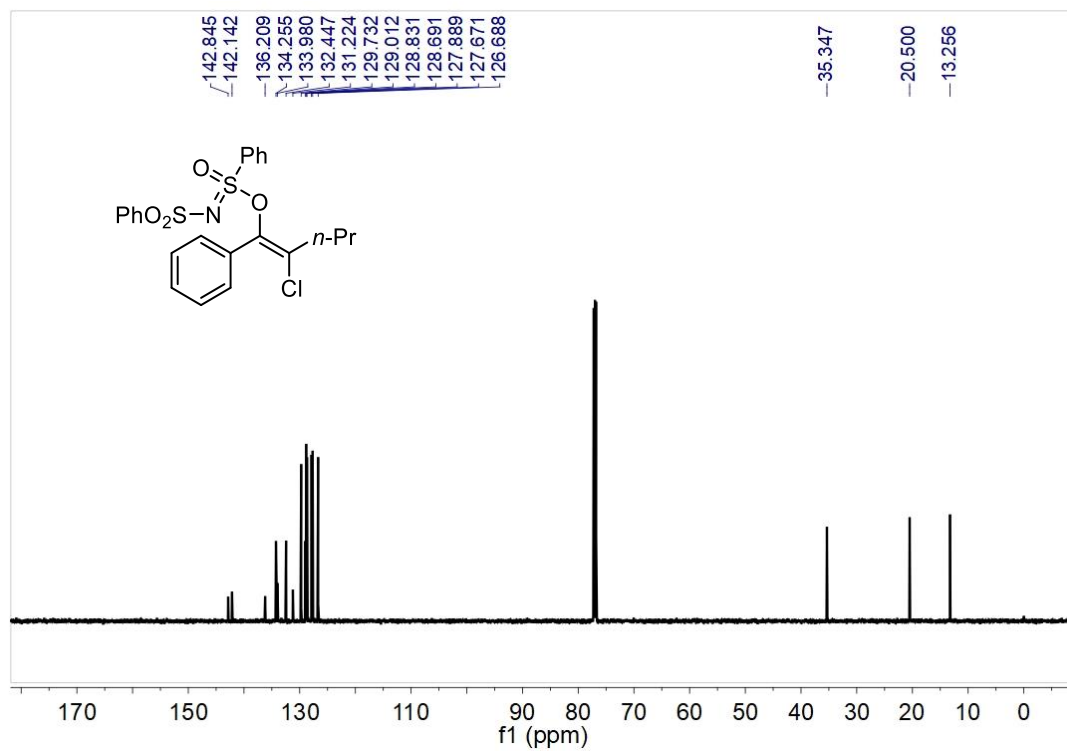

**<sup>13</sup>C NMR (150 MHz, CDCl<sub>3</sub>) spectrum of 5c.**

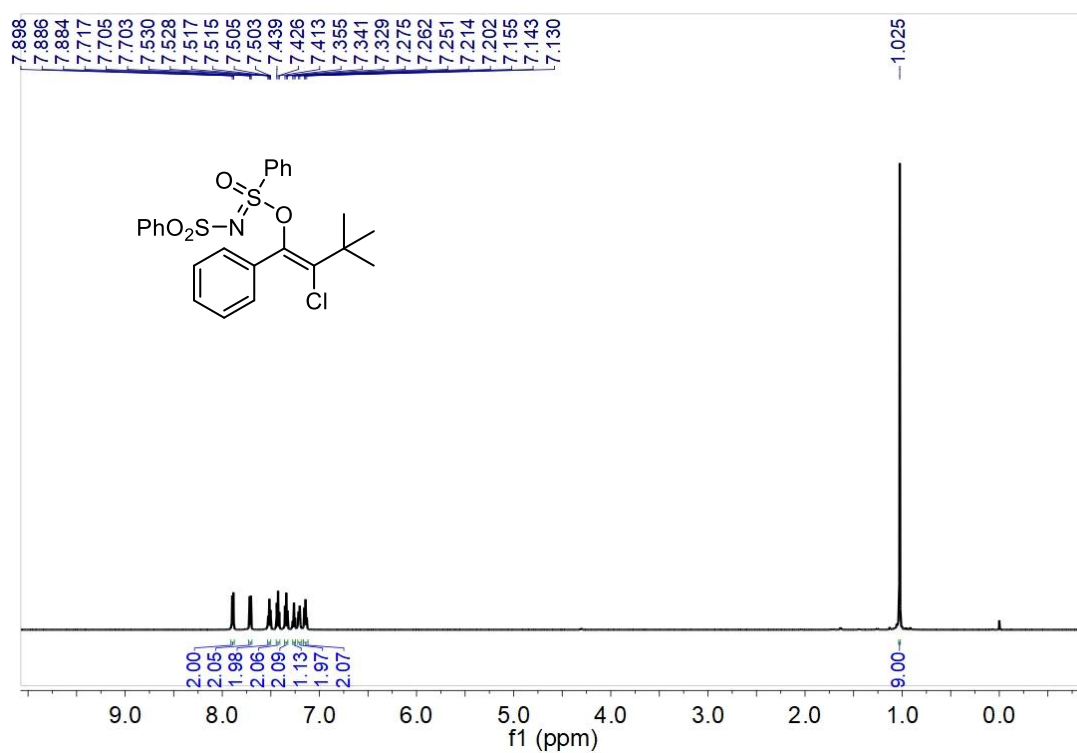

**<sup>1</sup>H NMR (600 MHz, CDCl<sub>3</sub>) spectrum of 5d.**

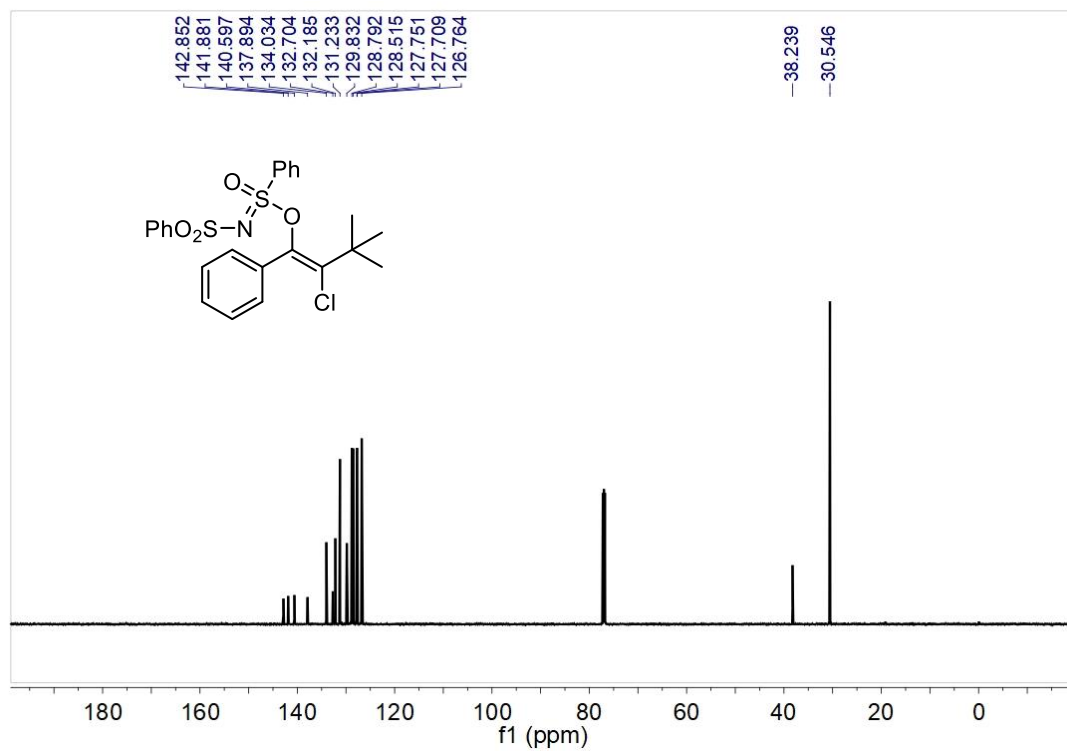

**<sup>13</sup>C NMR (150 MHz, CDCl<sub>3</sub>) spectrum of 5d.**

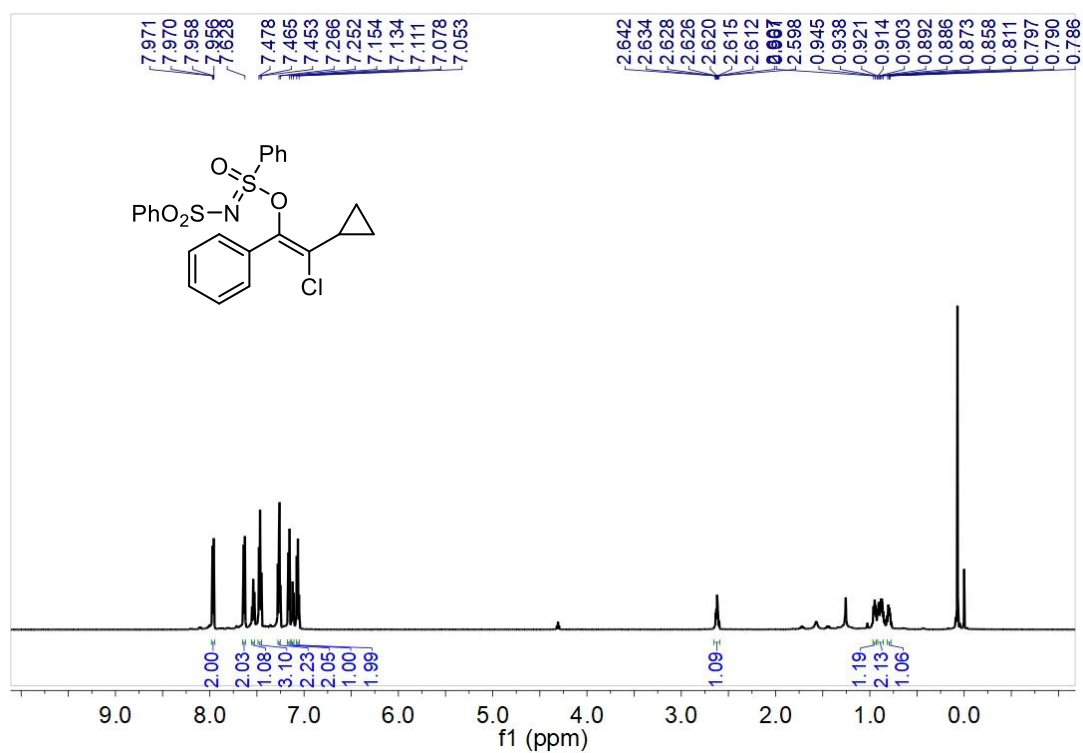

**<sup>1</sup>H NMR (600 MHz, CDCl<sub>3</sub>) spectrum of 5e.**

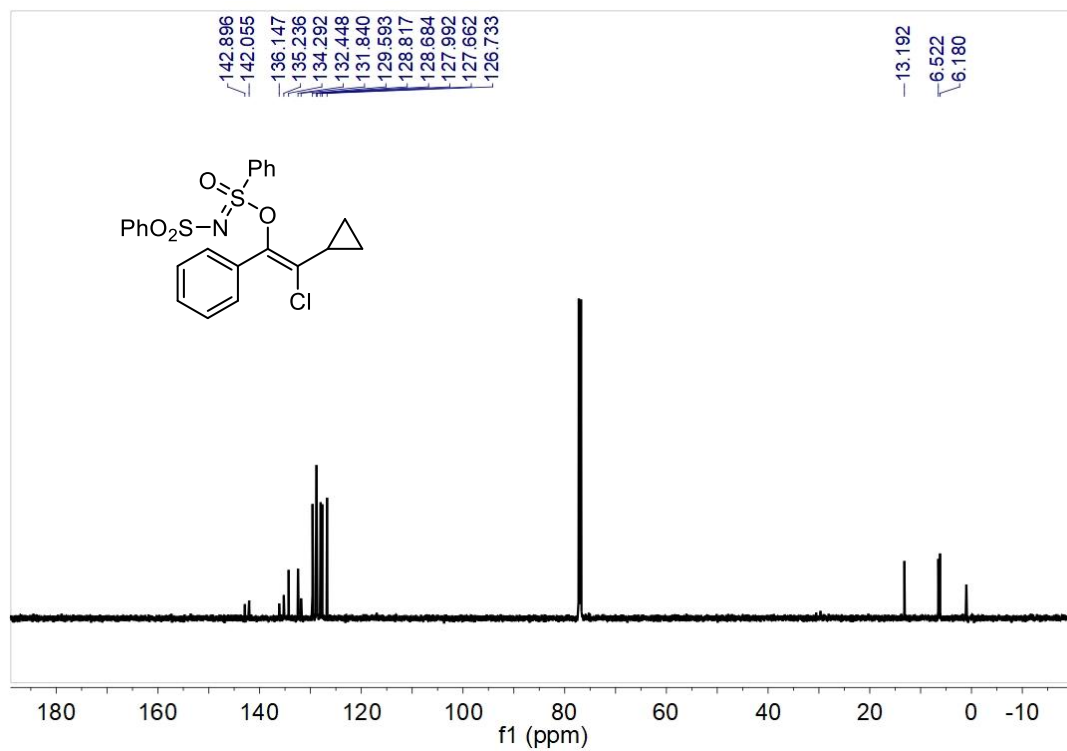

**<sup>13</sup>C NMR (150 MHz, CDCl<sub>3</sub>) spectrum of 5e.**

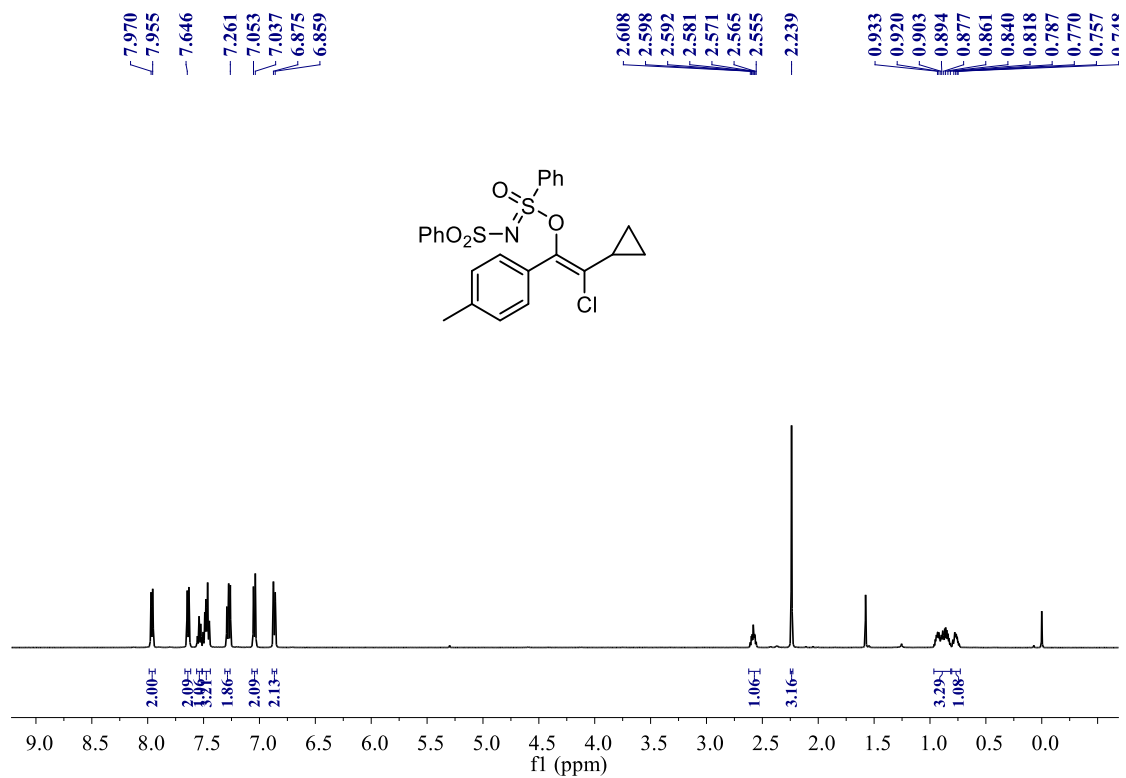

**<sup>1</sup>H NMR (500 MHz, CDCl<sub>3</sub>) spectrum of 5f.**

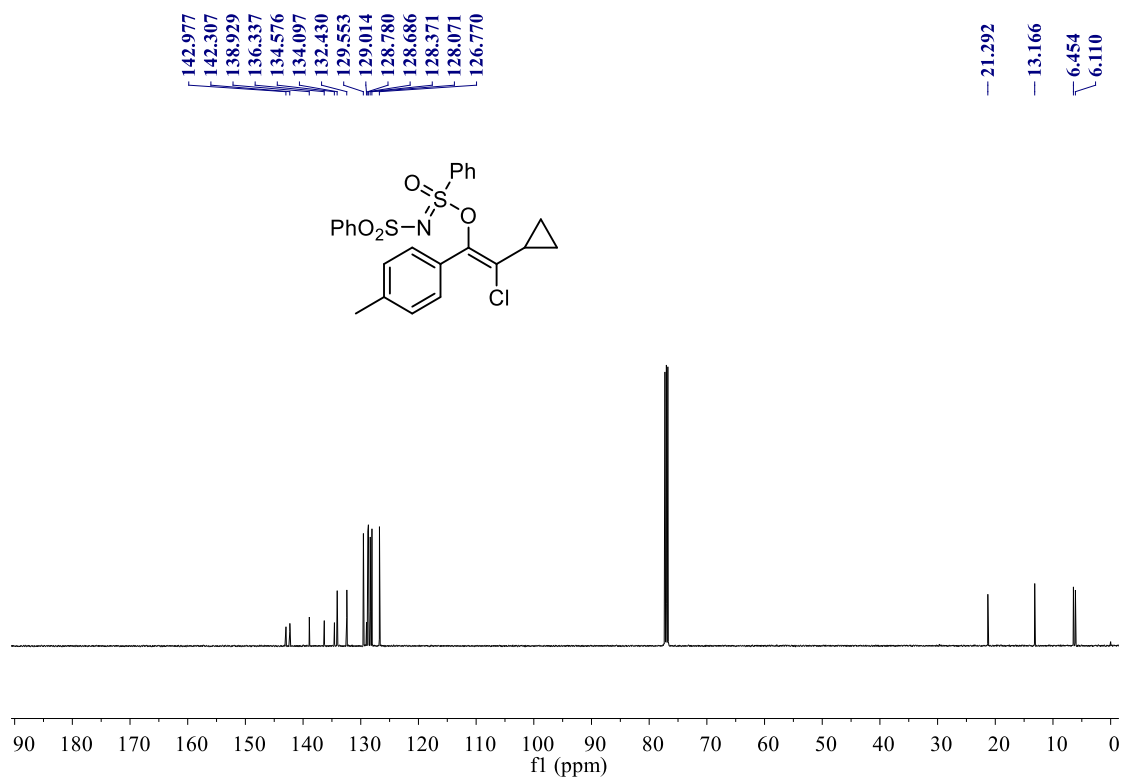

**<sup>13</sup>C NMR (150 MHz, CDCl<sub>3</sub>) spectrum of 5f.**

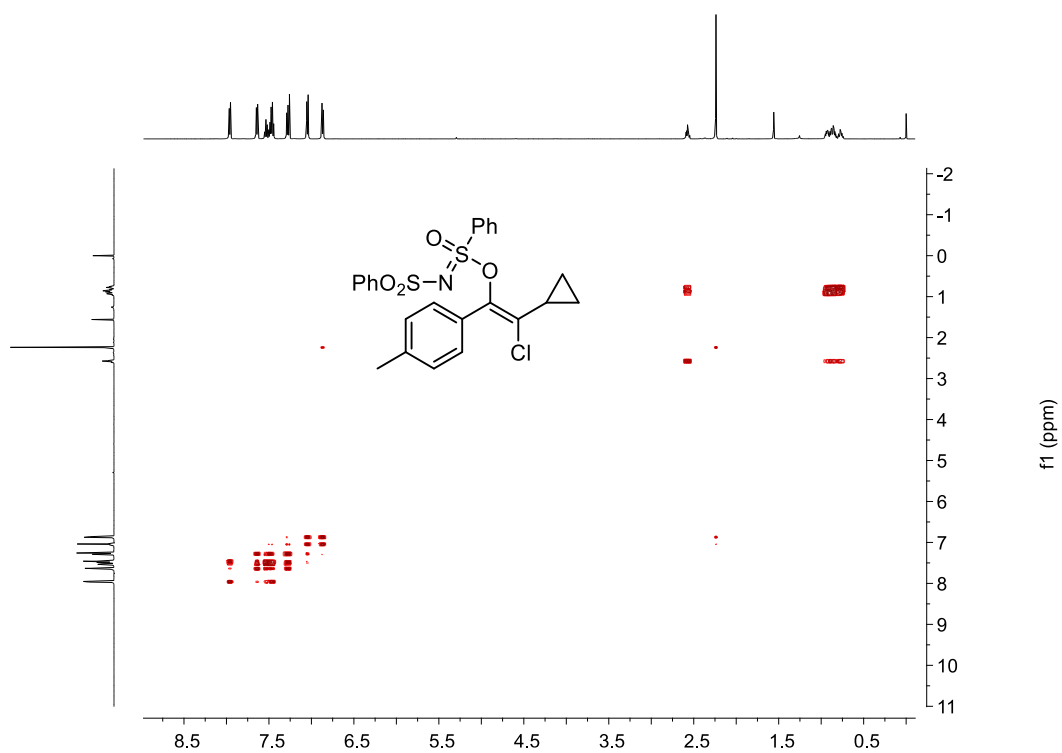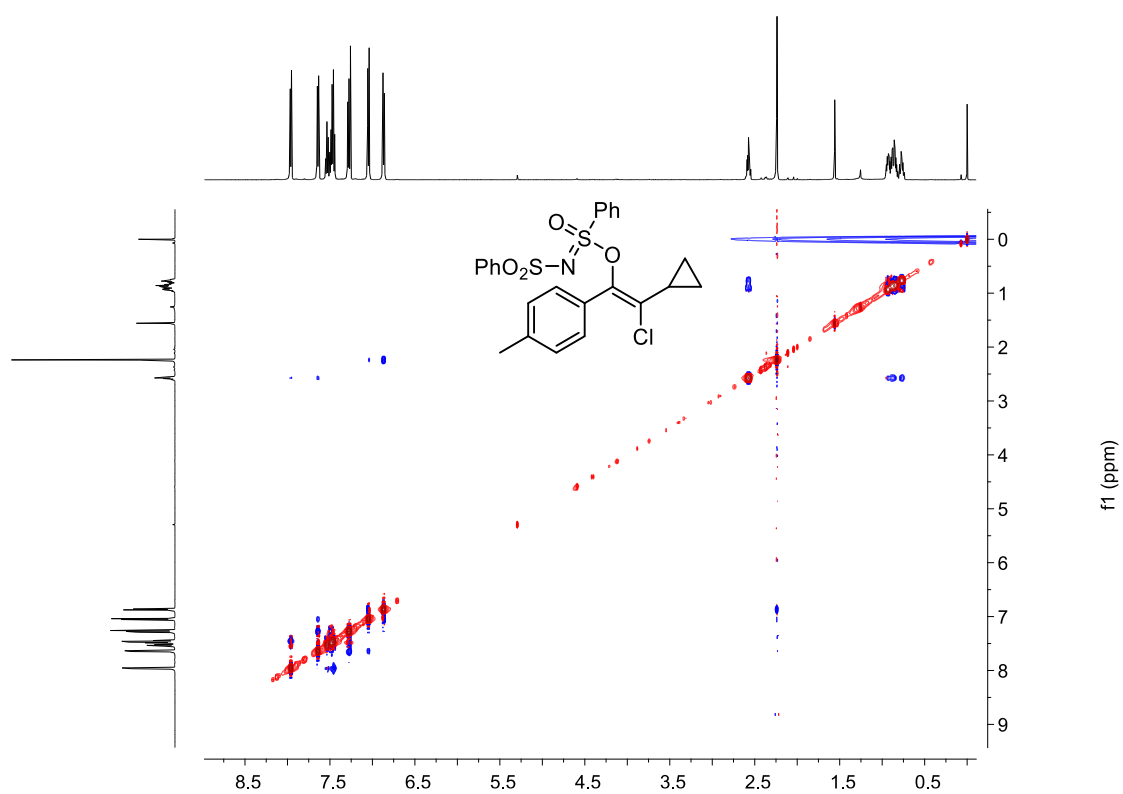

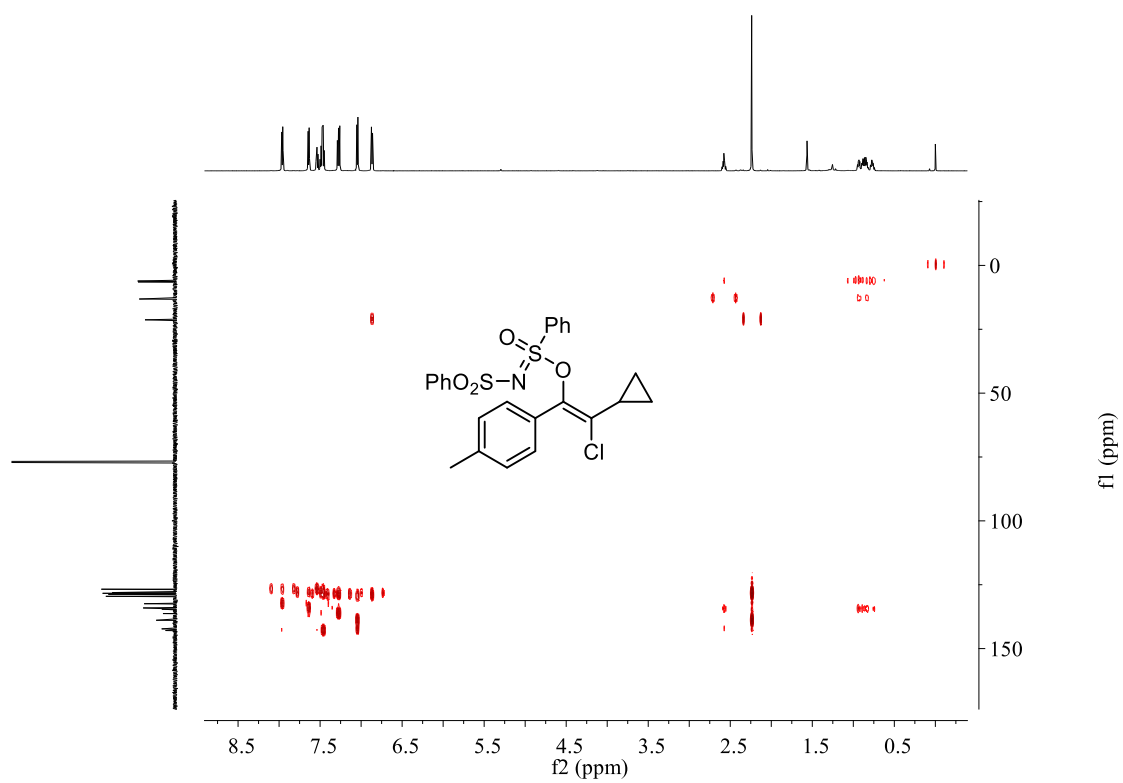

**$^1\text{H}$ - $^{13}\text{C}$  HMQC spectrum of 5f.**



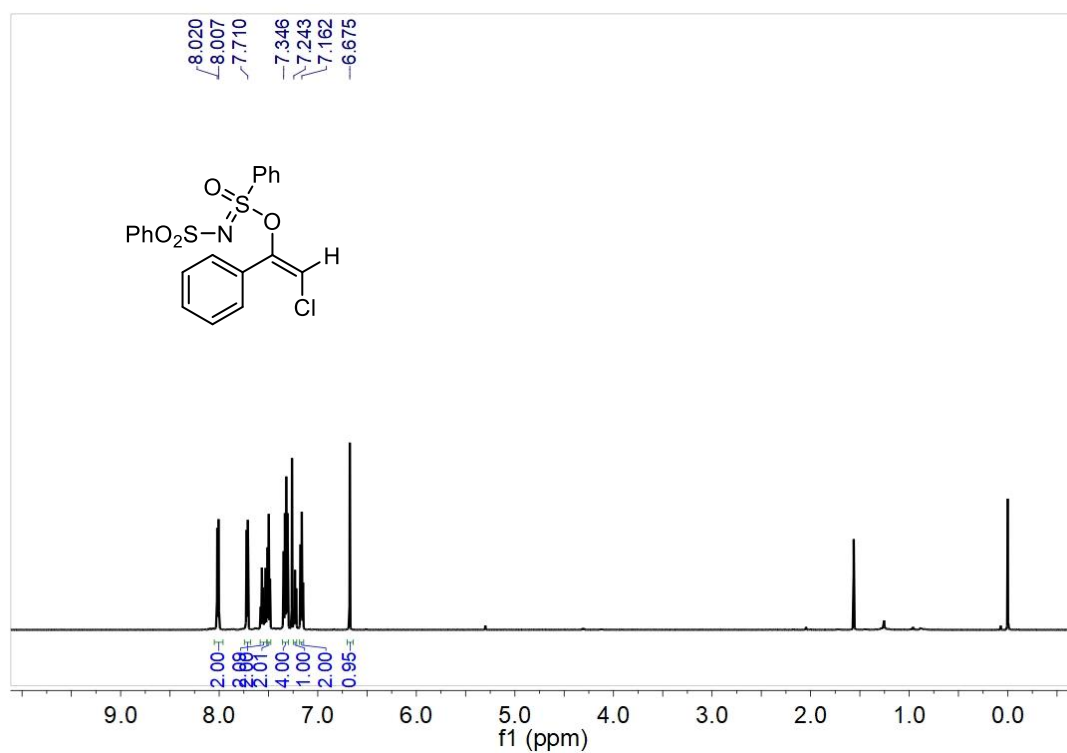

**<sup>1</sup>H NMR (600 MHz, CDCl<sub>3</sub>) spectrum of 5g.**

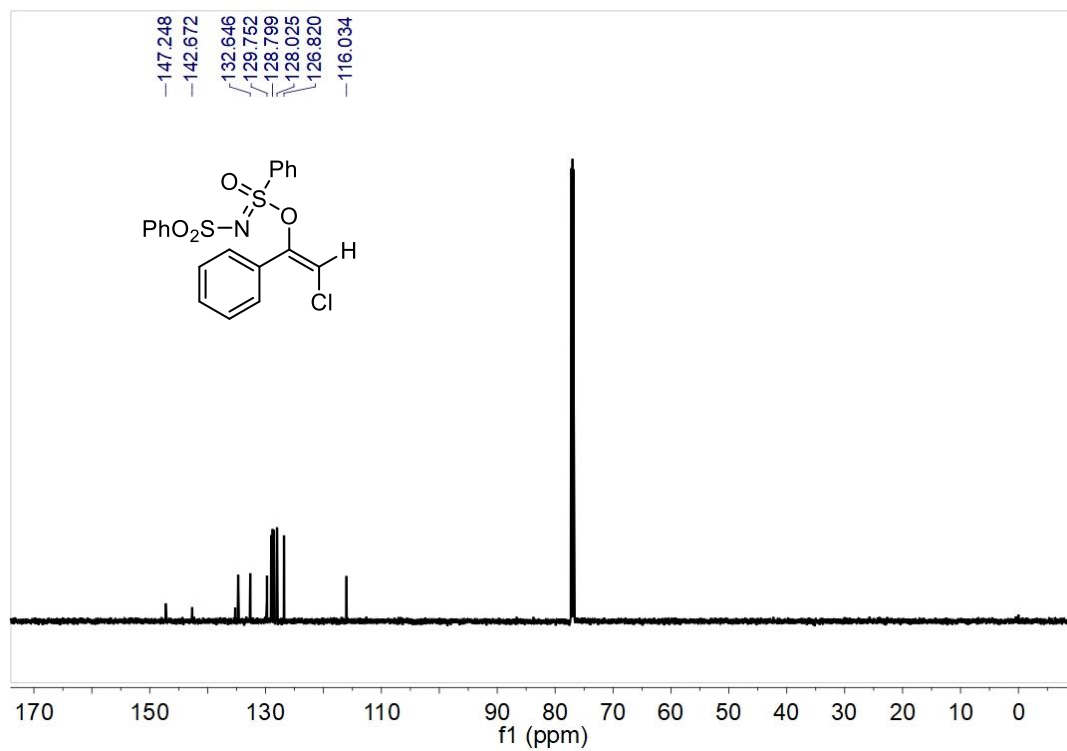

**<sup>13</sup>C NMR (150 MHz, CDCl<sub>3</sub>) spectrum of 5g.**

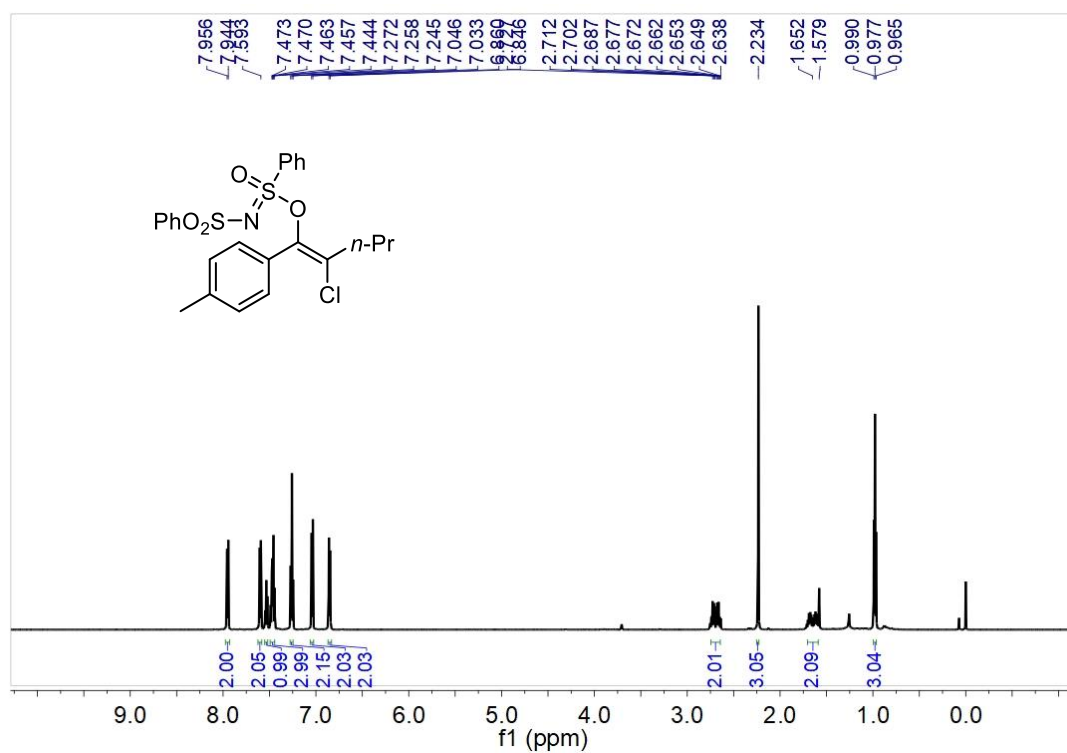

**<sup>1</sup>H NMR (600 MHz, CDCl<sub>3</sub>) spectrum of 5h.**

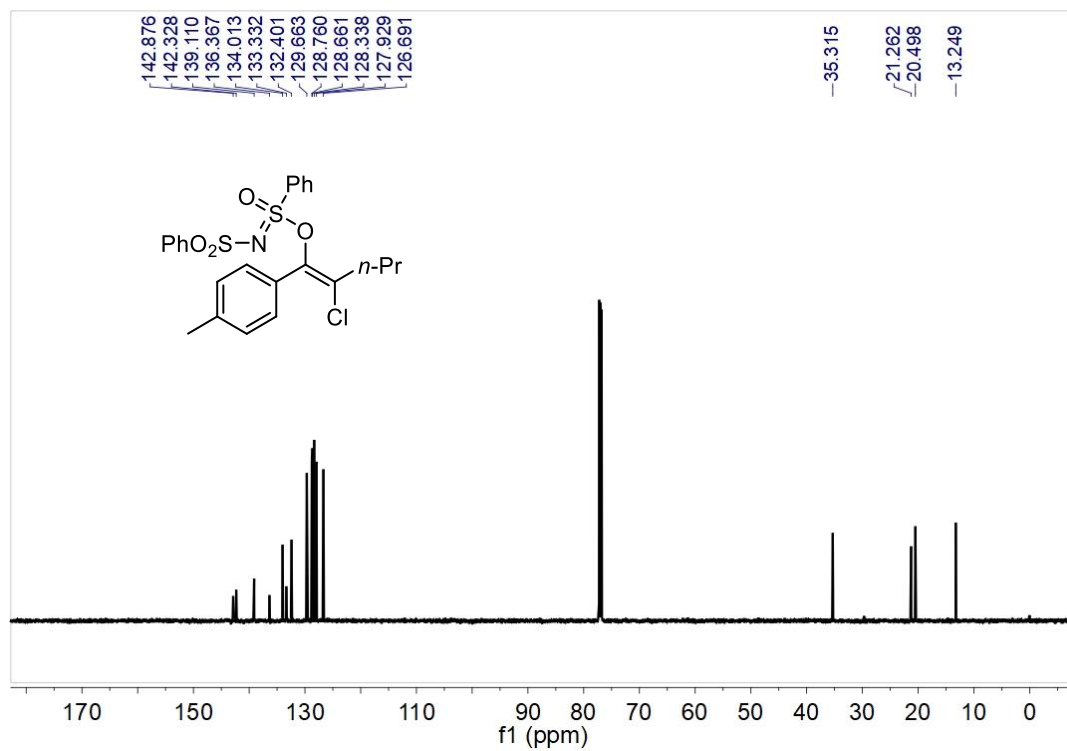

**<sup>13</sup>C NMR (150 MHz, CDCl<sub>3</sub>) spectrum of 5h.**

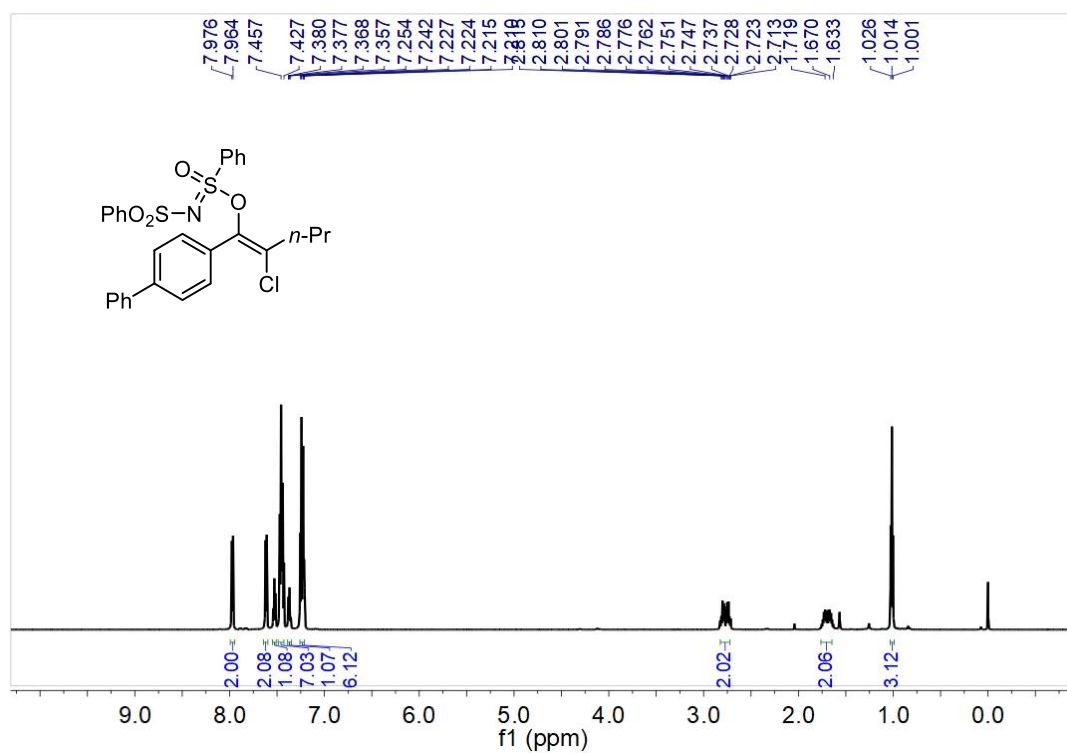

**<sup>1</sup>H NMR (600 MHz, CDCl<sub>3</sub>) spectrum of 5i.**

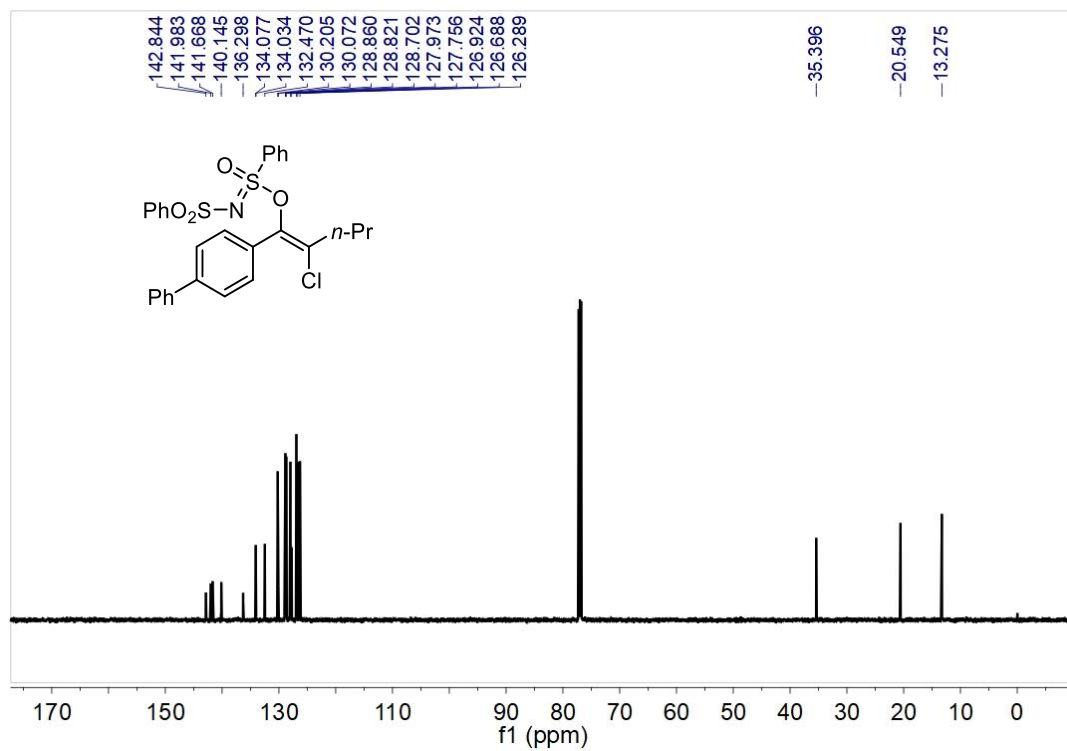

**$^{13}\text{C}$  NMR (150 MHz,  $\text{CDCl}_3$ ) spectrum of 5i.**

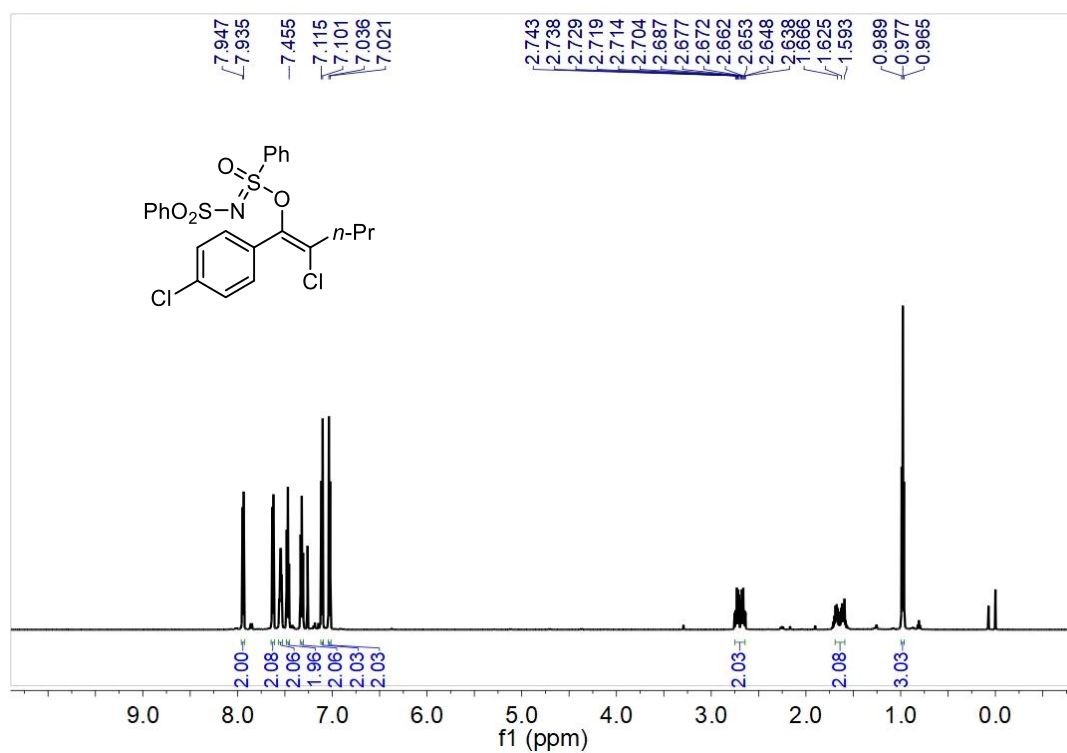

**<sup>1</sup>H NMR (600 MHz, CDCl<sub>3</sub>) spectrum of 5j.**

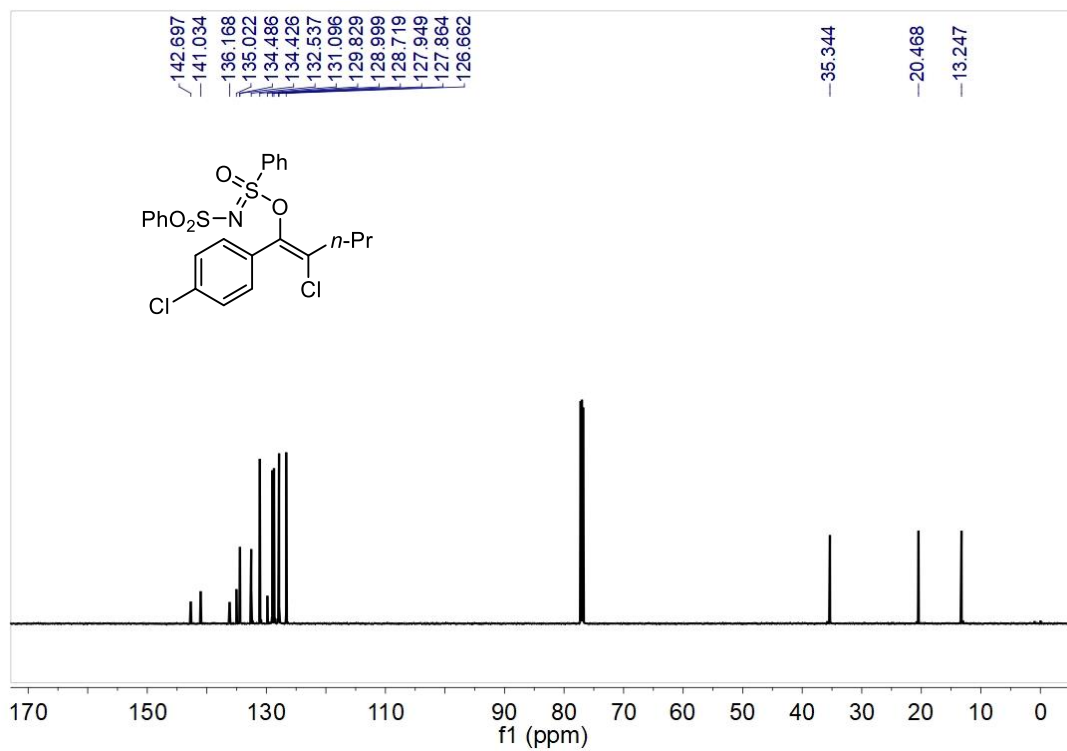

**<sup>13</sup>C NMR (150 MHz, CDCl<sub>3</sub>) spectrum of 5j.**

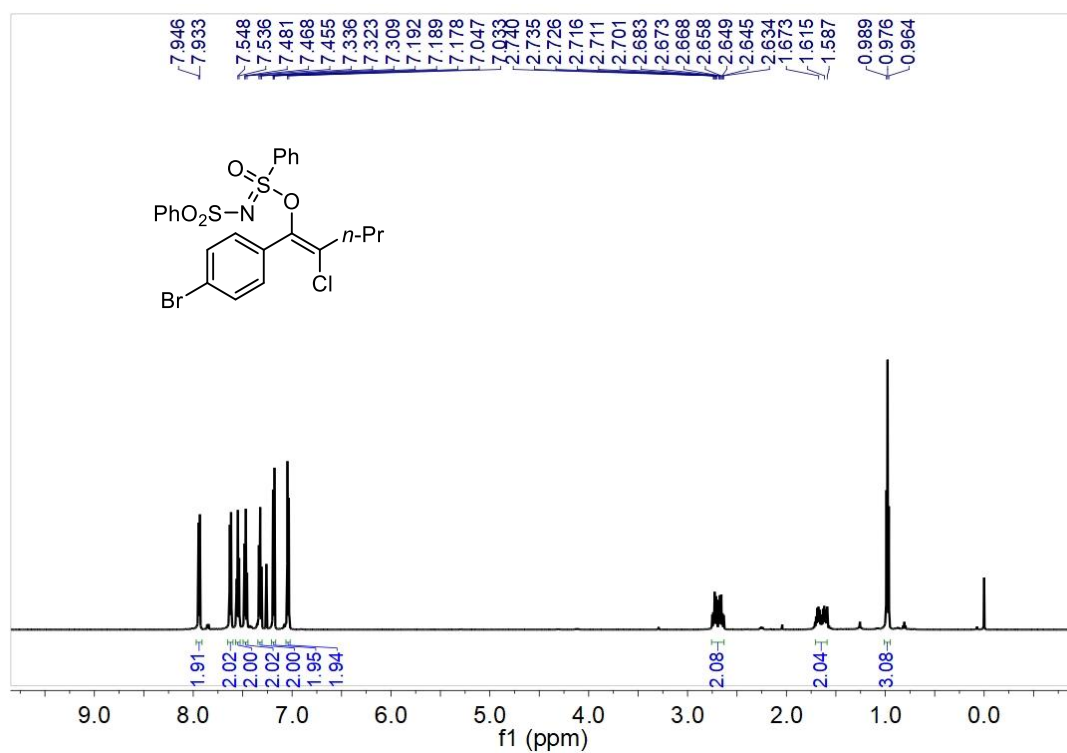

**<sup>1</sup>H NMR (600 MHz, CDCl<sub>3</sub>) spectrum of 5k.**

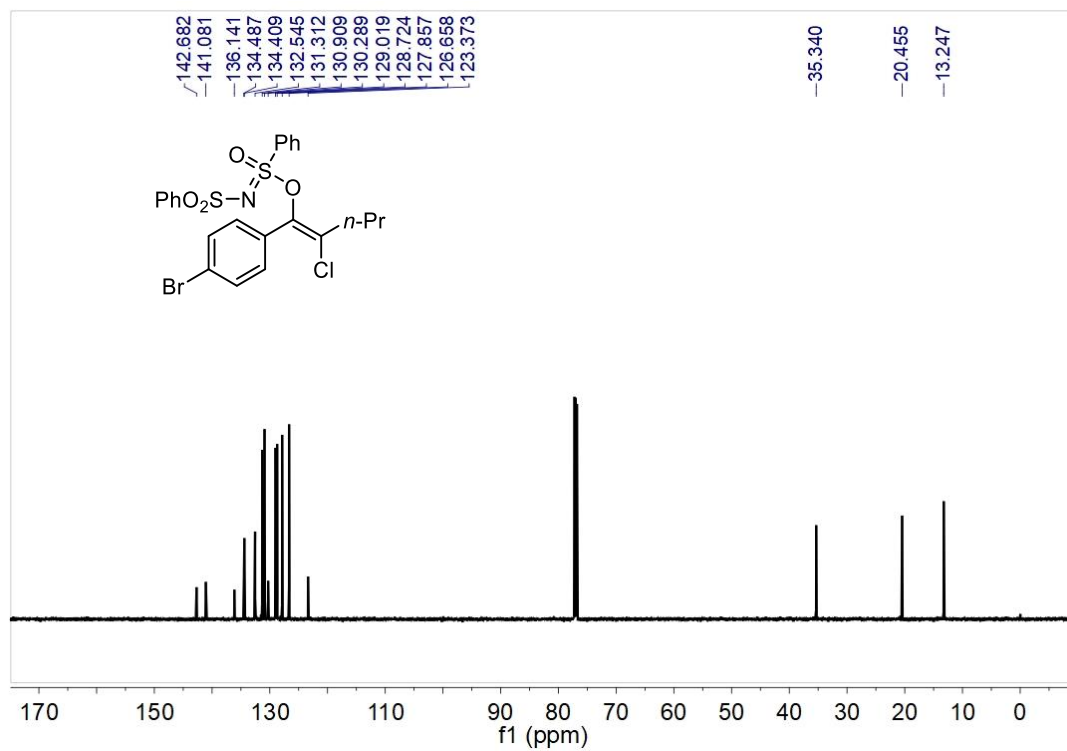

**<sup>13</sup>C NMR (150 MHz, CDCl<sub>3</sub>) spectrum of 5k.**

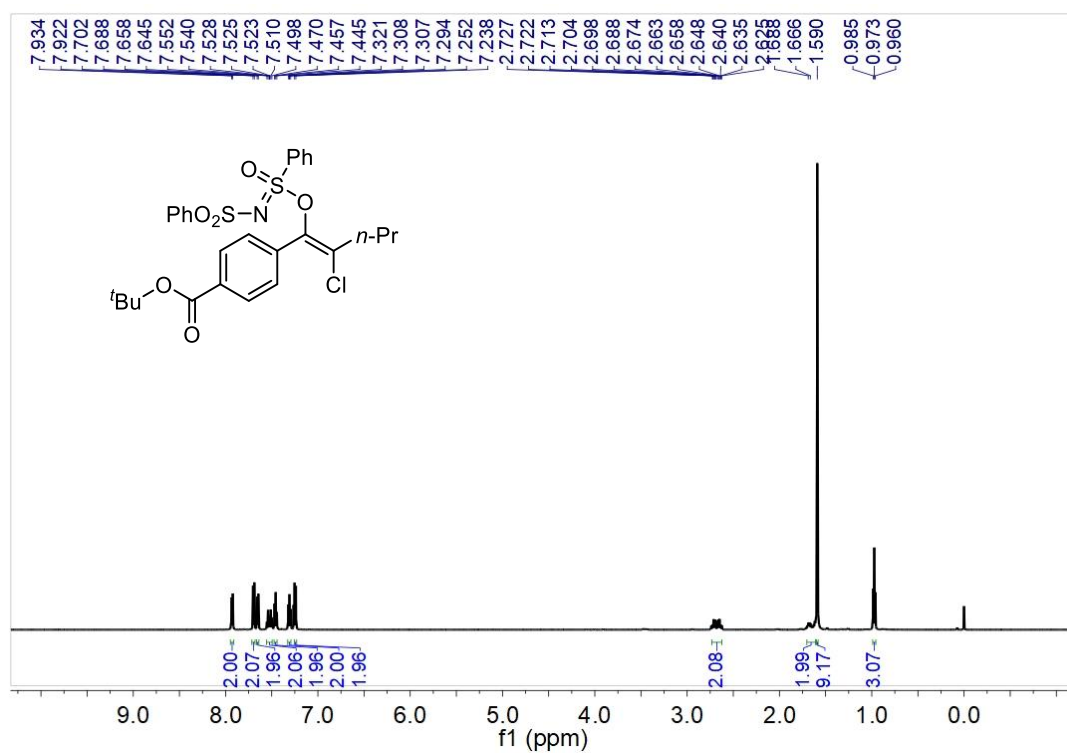

**<sup>1</sup>H NMR (600 MHz, CDCl<sub>3</sub>) spectrum of 5l.**

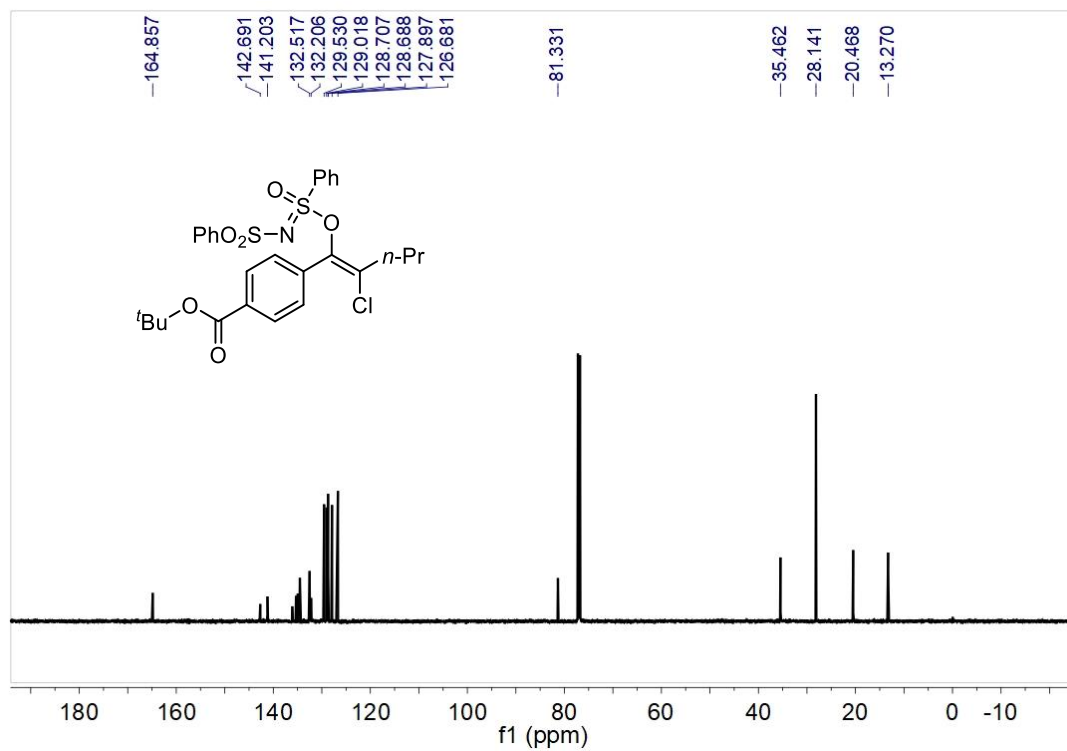

**<sup>13</sup>C NMR (150 MHz, CDCl<sub>3</sub>) spectrum of 5l.**

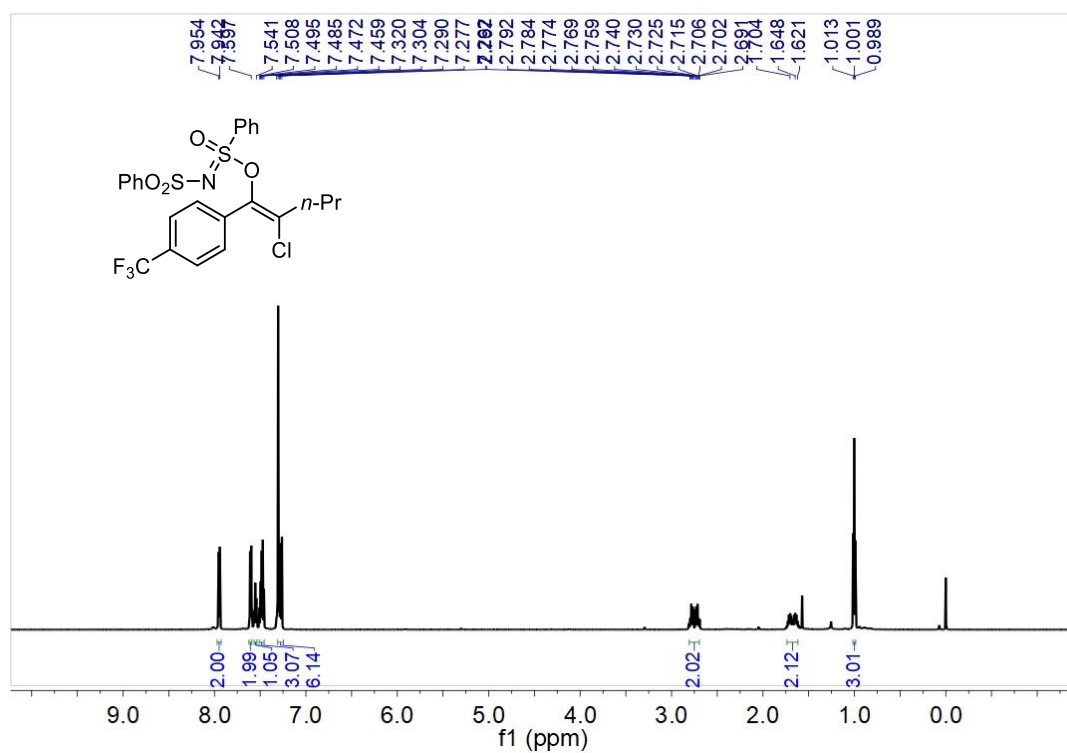

<sup>1</sup>H NMR (600 MHz, CDCl<sub>3</sub>) spectrum of 5m.

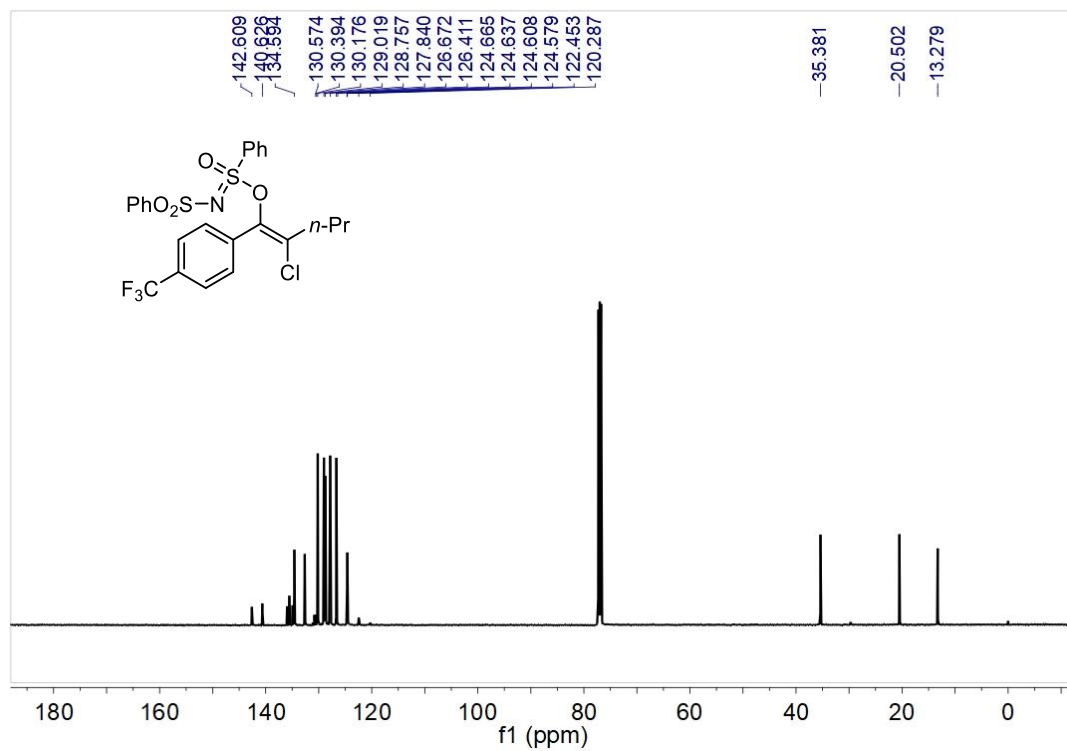

<sup>13</sup>C NMR (125 MHz, CDCl<sub>3</sub>) spectrum of 5m.

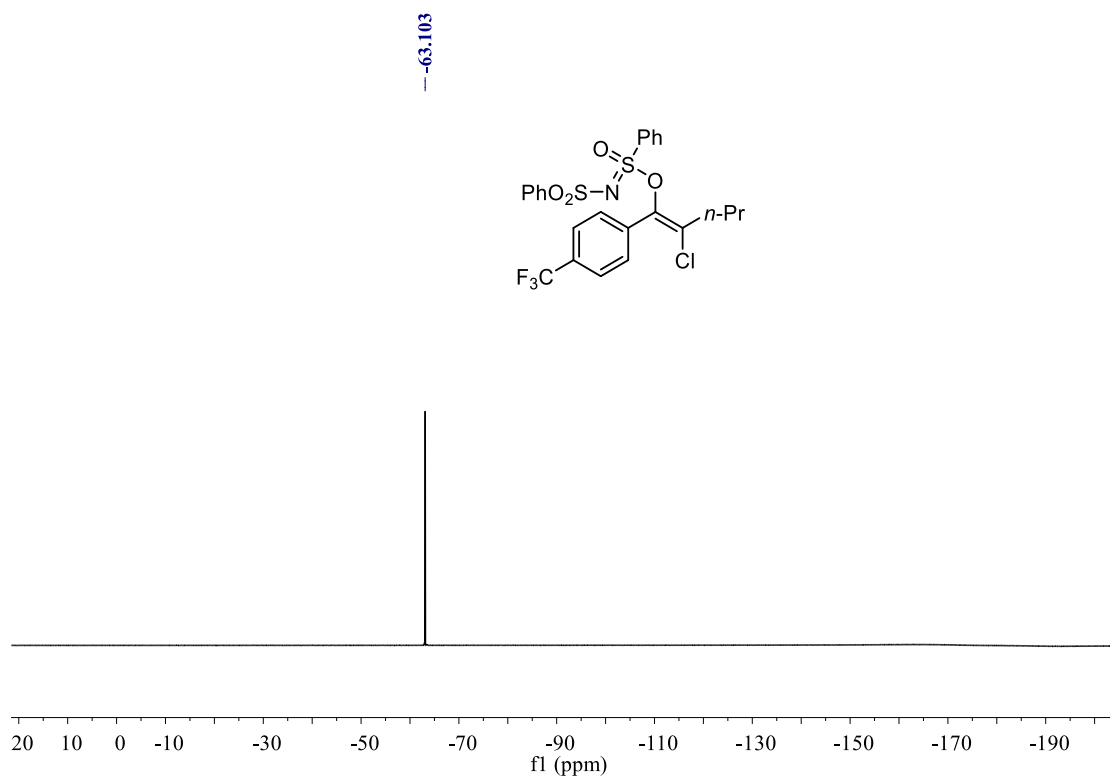

**$^{19}\text{F}$  NMR (565 MHz,  $\text{CDCl}_3$ ) spectrum of **5m**.**



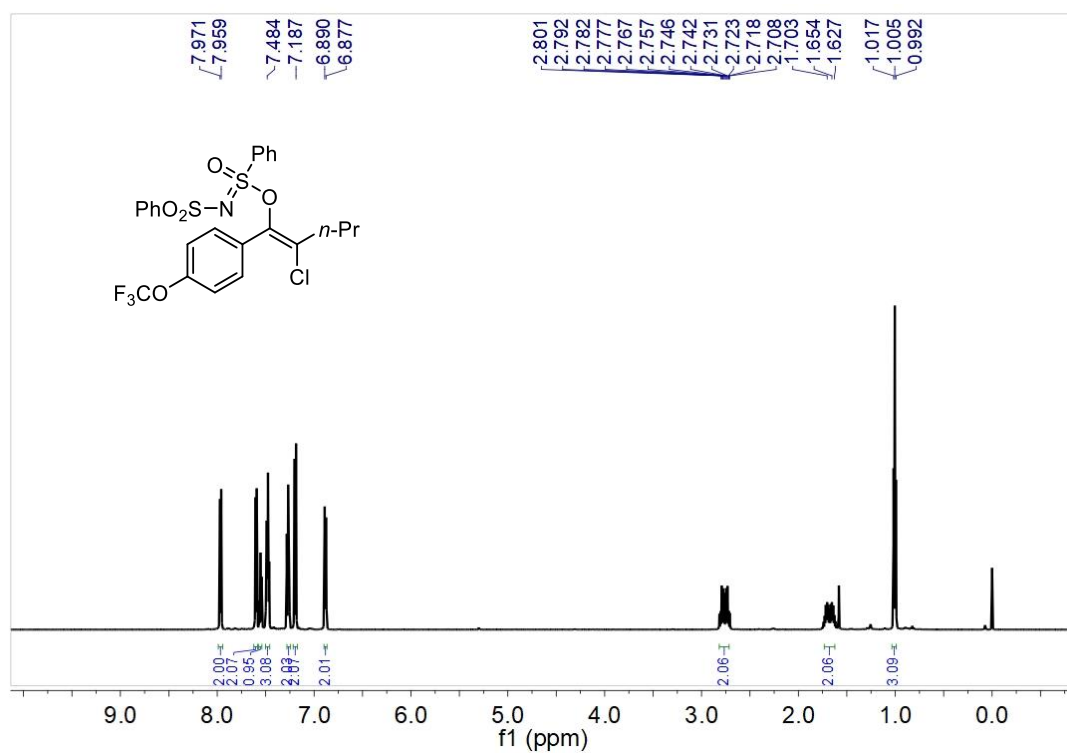

**<sup>1</sup>H NMR (600 MHz, CDCl<sub>3</sub>) spectrum of 5n.**

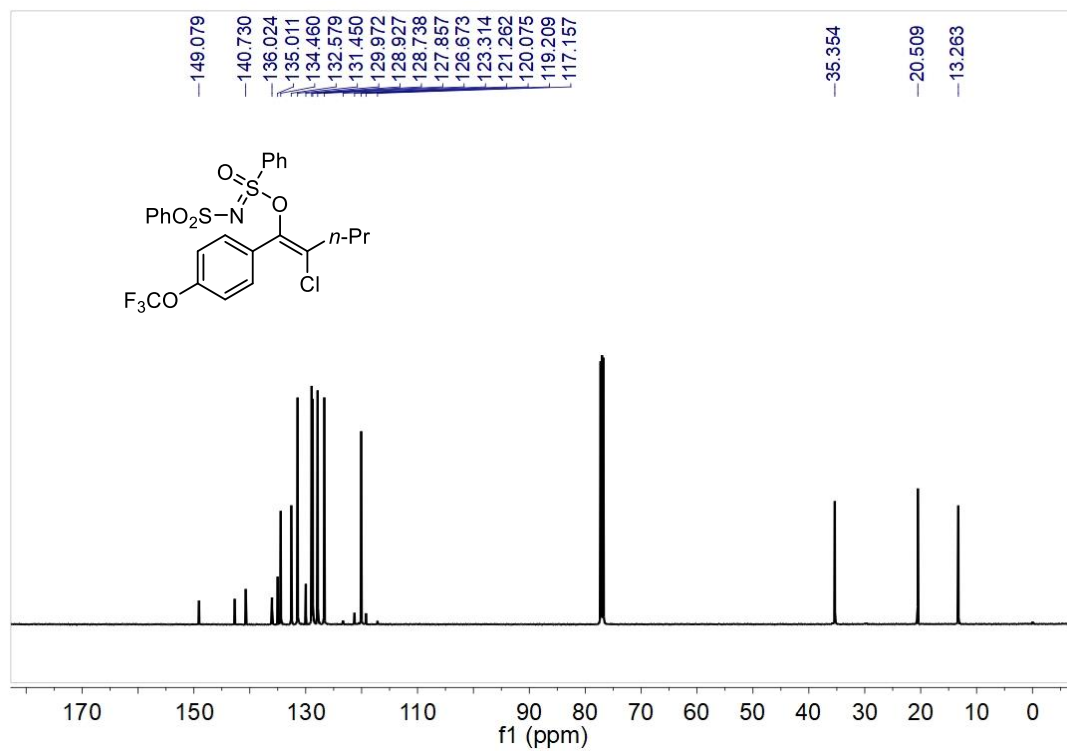

**<sup>13</sup>C NMR (125 MHz, CDCl<sub>3</sub>) spectrum of 5n.**

CC(=C(Cl)C1=CC=C(C=C1)C(=O)N(S(=O)(=O)c2ccccc2)C(=O)c3ccccc3)C(F)(F)F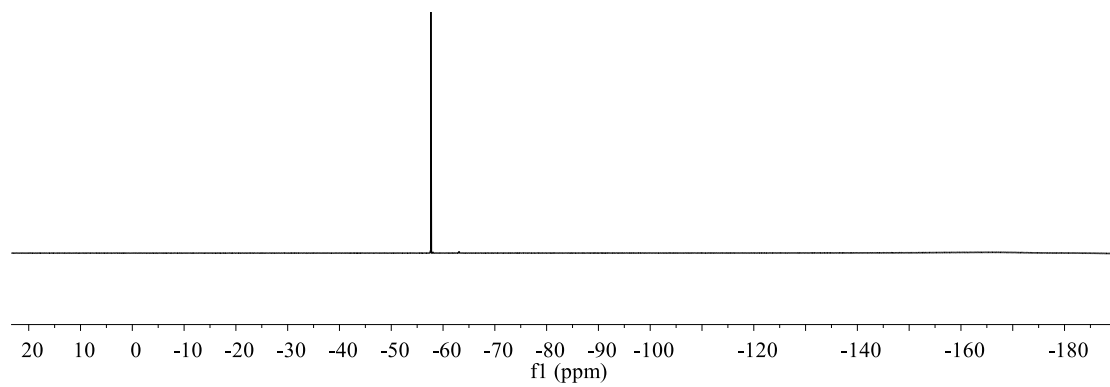

**<sup>19</sup>F NMR (565 MHz, CDCl<sub>3</sub>) spectrum of 5n.**

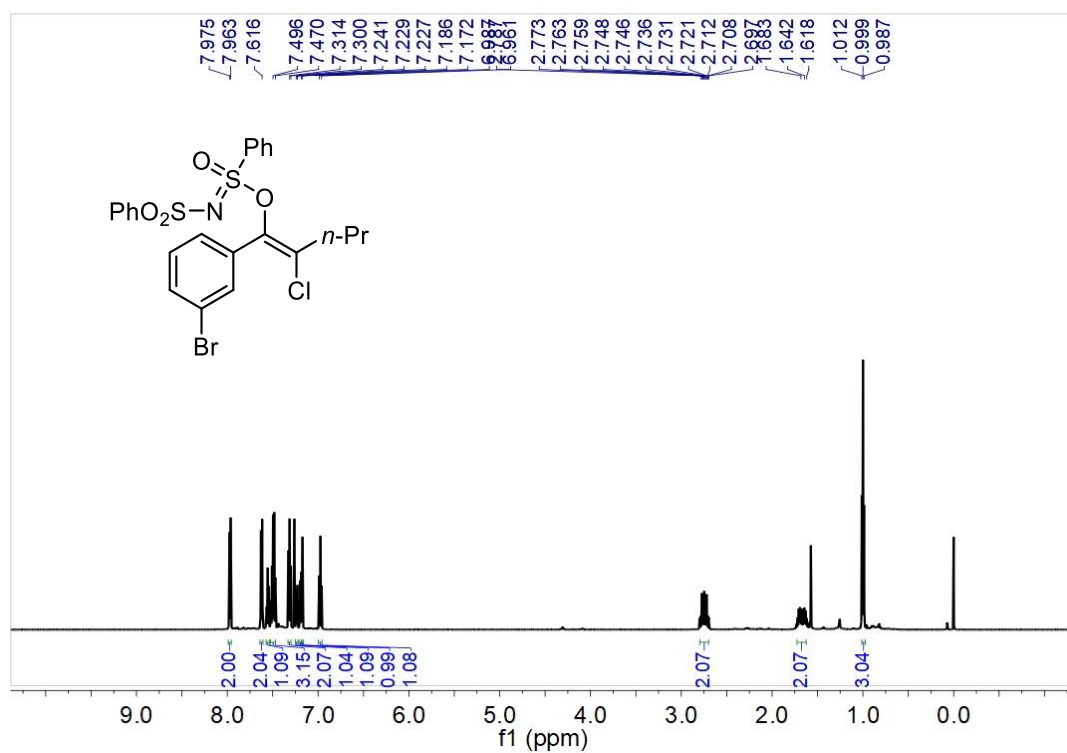

**<sup>1</sup>H NMR (600 MHz, CDCl<sub>3</sub>) spectrum of 5o.**

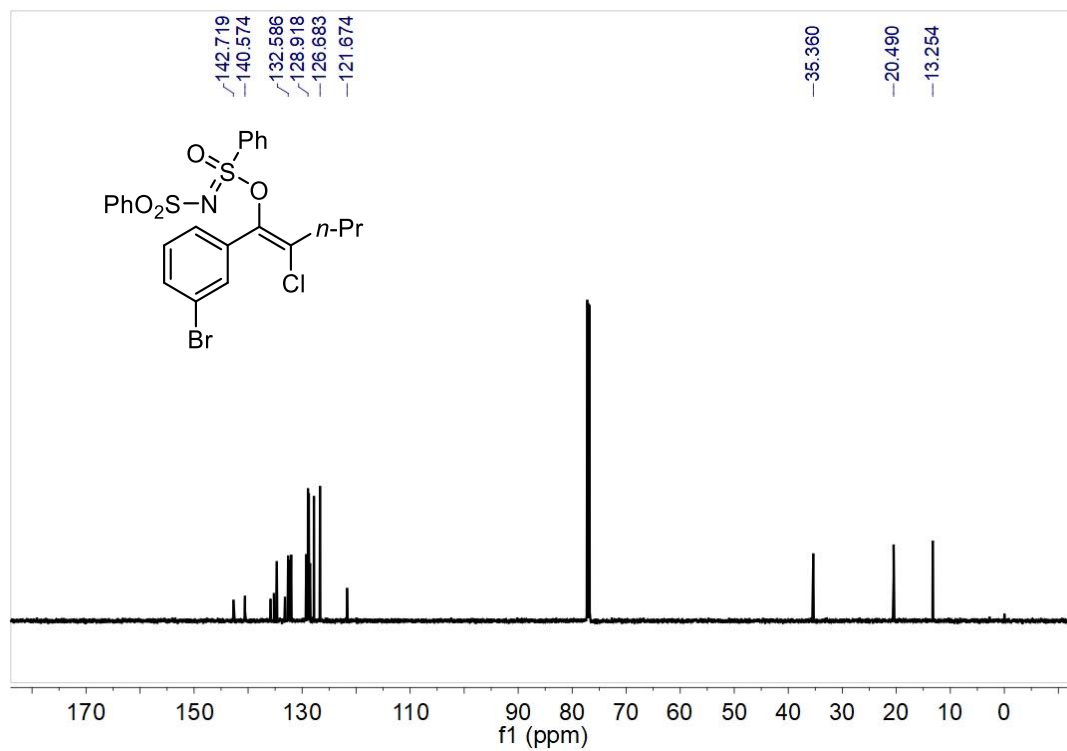

**<sup>13</sup>C NMR (150 MHz, CDCl<sub>3</sub>) spectrum of 5o.**

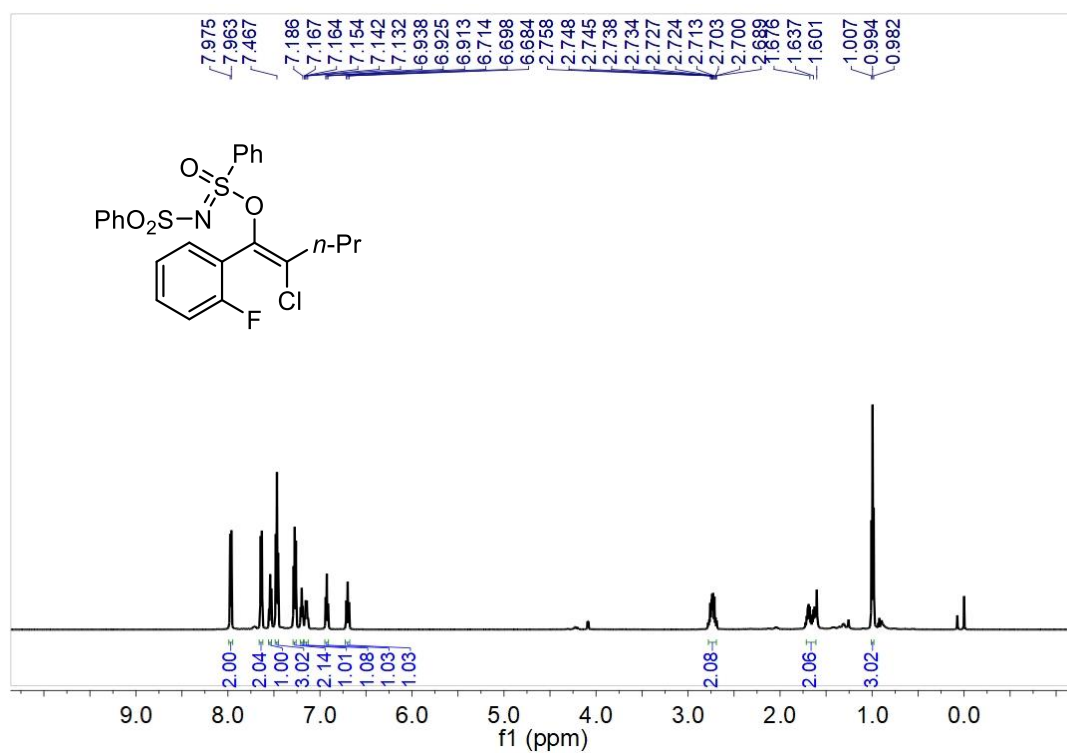

**<sup>1</sup>H NMR (600 MHz, CDCl<sub>3</sub>) spectrum of 5p.**

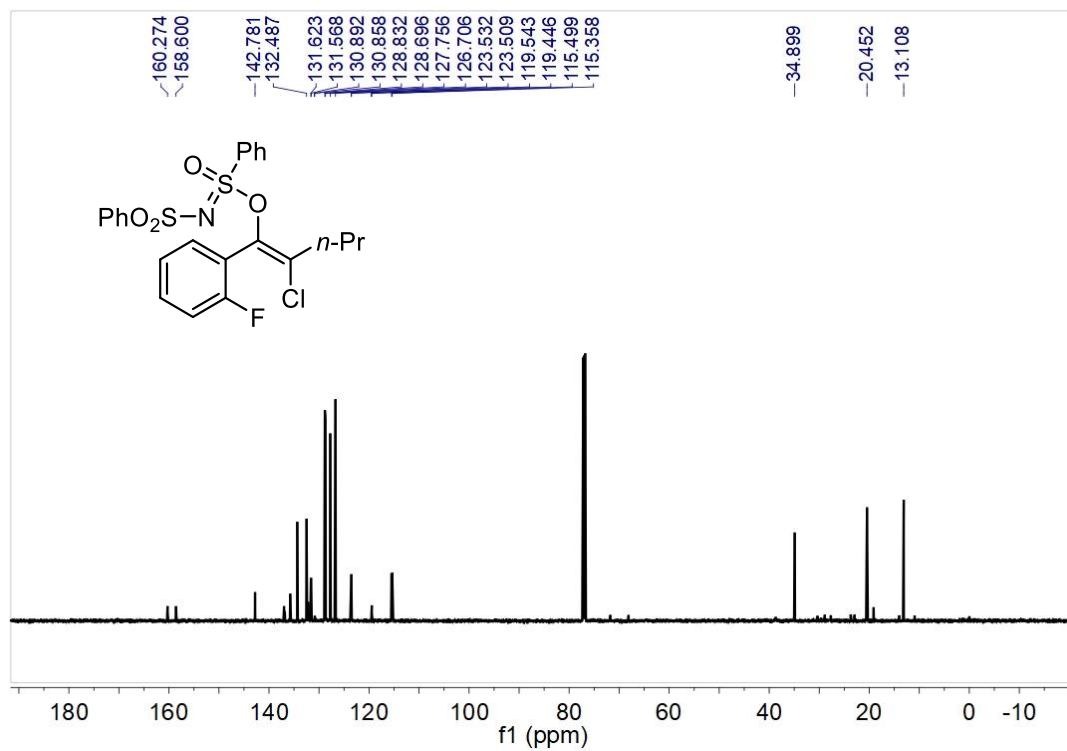

**<sup>13</sup>C NMR (150 MHz, CDCl<sub>3</sub>) spectrum of 5p.**

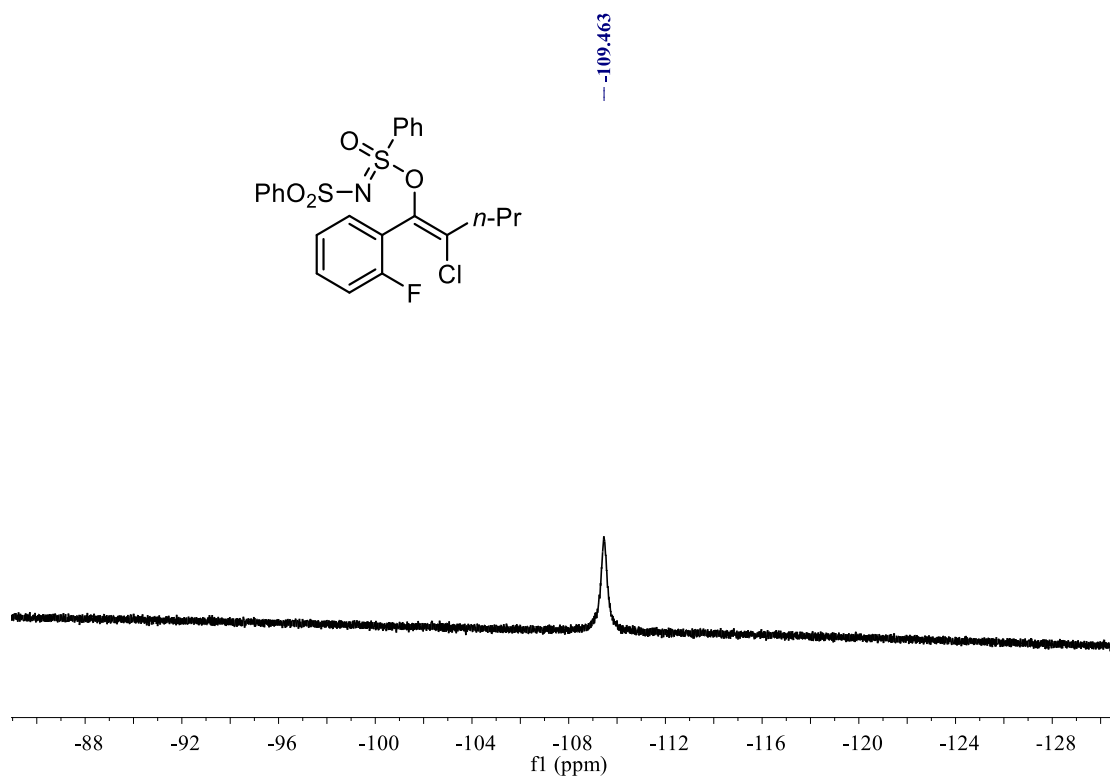

**<sup>19</sup>F NMR (565 MHz, CDCl<sub>3</sub>) spectrum of 5p.**
